# Supplementary material for: Human Milk Metabolomics Are Related to Maternal Adiposity, Infant Growth Rate and Allergies: The Chinese Human Milk Project
Source: MDPI journal article supplement (doi:10.3390/nu14102097), 2022-05-18
Supplement: s1 [file s1]

**Table S1.** Characteristics of human milk PC 1.

| Metabolites                                               | Class                            | PCA loadings | Bootstrap 95% CI of loadings |       | Contribution (%) | FDR      |
|-----------------------------------------------------------|----------------------------------|--------------|------------------------------|-------|------------------|----------|
| 4-Hydroxy-L-glutamic acid                                 | Organic acids and derivatives    | -0.87        | -0.91                        | -0.81 | 1.56             | 3.76E-61 |
| Biliverdin                                                | Tetrapyrroles and derivatives    | -0.83        | -0.87                        | -0.74 | 1.82             | 4.46E-50 |
| Glaucarubin                                               | Prenol lipids                    | -0.77        | -0.82                        | -0.69 | 1.46             | 5.18E-39 |
| Melleolide M                                              | Prenol lipids                    | -0.75        | -0.81                        | -0.65 | 1.49             | 2.07E-36 |
| N2-gamma-Glutamylglutamine                                | Carboxylic acids and derivatives | -0.75        | -0.80                        | -0.67 | 1.08             | 1.02E-35 |
| 5-Hydroxyisourate                                         | Imidazopyrimidines               | -0.73        | -0.81                        | -0.60 | 3.81             | 7.16E-34 |
| D-Glutamine                                               | Carboxylic acids and derivatives | -0.73        | -0.81                        | -0.58 | 0.76             | 3.39E-33 |
| Dihydromaleimide                                          | Pyrrolines                       | -0.71        | -0.80                        | -0.55 | 0.46             | 3.33E-31 |
| MG(0:0/22:4(7Z,10Z,13Z,16Z)/0:0)                          | Glycerolipids                    | -0.69        | -0.78                        | -0.56 | 0.85             | 7.52E-29 |
| Sonchuionoside C                                          | Prenol lipids                    | -0.69        | -0.80                        | -0.57 | 1.02             | 3.81E-28 |
| N-Methylnicotinamide                                      | Pyridines and derivatives        | -0.67        | -0.75                        | -0.56 | 0.45             | 8.65E-27 |
| Pyroglutamic acid                                         | Carboxylic acids and derivatives | -0.67        | -0.78                        | -0.51 | 2.21             | 2.14E-26 |
| PC(18:3(6Z,9Z,12Z)/15:0)                                  | Glycerophospholipids             | -0.64        | -0.79                        | -0.44 | 0.47             | 8.69E-24 |
| Adenosine                                                 | Purine nucleosides               | -0.63        | -0.74                        | -0.50 | 0.63             | 8.81E-23 |
| Citrulline                                                | Carboxylic acids and derivatives | -0.63        | -0.73                        | -0.46 | 0.32             | 1.73E-22 |
| Pyrrolidonecarboxylic acid                                | Carboxylic acids and derivatives | -0.62        | -0.75                        | -0.45 | 0.26             | 6.72E-22 |
| 1-(Malonylamino)cyclopropanecarboxylic acid               | Carboxylic acids and derivatives | -0.58        | -0.73                        | -0.35 | 0.46             | 8.86E-19 |
| 5'-Methylthioadenosine                                    | 5'-deoxyribonucleosides          | -0.57        | -0.68                        | -0.49 | 0.39             | 9.50E-18 |
| PE(16:0/20:4(5Z,8Z,11Z,14Z))                              | Glycerophospholipids             | -0.56        | -0.70                        | -0.37 | 0.43             | 3.66E-17 |
| Adenine                                                   | Imidazopyrimidines               | -0.56        | -0.66                        | -0.40 | 0.42             | 3.88E-17 |
| 5beta-Cholestane-3alpha,7alpha,24,26-tetrol               | Steroids and steroid derivatives | -0.56        | -0.68                        | -0.38 | 0.43             | 6.42E-17 |
| 5-Hydroxy-7-methoxy-2-tritriacontyl-4H-1-benzopyran-4-one | Benzopyrans                      | -0.56        | -0.73                        | -0.37 | 0.53             | 7.30E-17 |
| PE(22:5(4Z,7Z,10Z,13Z,16Z)/16:0)                          | Glycerophospholipids             | -0.55        | -0.72                        | -0.34 | 0.36             | 2.40E-16 |

|                                                       |                                              |       |       |       |      |          |
|-------------------------------------------------------|----------------------------------------------|-------|-------|-------|------|----------|
| Lacto-N-biose I                                       | Organooxygen compounds                       | -0.55 | -0.65 | -0.40 | 0.24 | 2.91E-16 |
| Dihydrouracil                                         | Diazines                                     | -0.52 | -0.65 | -0.32 | 0.15 | 1.30E-14 |
| 3-Methylguanine                                       | Imidazopyrimidines                           | -0.51 | -0.66 | -0.28 | 0.28 | 4.43E-14 |
| D-Maltose                                             | Organooxygen compounds                       | -0.51 | -0.64 | -0.31 | 0.18 | 6.67E-14 |
| Prolyl-Arginine                                       | Carboxylic acids and derivatives             | 0.50  | 0.37  | 0.61  | 0.79 | 3.02E-13 |
| beta-Lactose                                          | Carbohydrates and carbohydrate<br>conjugates | 0.50  | 0.35  | 0.62  | 0.59 | 1.94E-13 |
| Cytidine                                              | Pyrimidine nucleosides                       | 0.51  | 0.32  | 0.65  | 0.30 | 6.67E-14 |
| Cholesterol                                           | Steroids and steroid derivatives             | 0.54  | 0.40  | 0.66  | 0.58 | 1.35E-15 |
| Niacinamide                                           | Pyridines and derivatives                    | 0.56  | 0.40  | 0.68  | 0.38 | 2.51E-17 |
| PC(22:2(13Z,16Z)/P-18:0)                              | Glycerophospholipids                         | 0.57  | 0.41  | 0.67  | 0.41 | 5.18E-18 |
| Ethyl trans-p-methoxycinnamate                        | Cinnamic acids and derivatives               | 0.63  | 0.50  | 0.71  | 2.06 | 2.53E-22 |
| Phenol glucuronide                                    | Organooxygen compounds                       | 0.63  | 0.48  | 0.72  | 0.50 | 1.88E-22 |
| 1-Methyl-1,3-cyclohexadiene                           | Olefins                                      | 0.63  | 0.49  | 0.73  | 0.32 | 1.07E-22 |
| LysoPE(16:0/0:0)                                      | Glycerophospholipids                         | 0.63  | 0.50  | 0.73  | 0.57 | 8.89E-23 |
| o-Xylene                                              | Benzene and substituted<br>derivatives       | 0.65  | 0.51  | 0.74  | 0.40 | 2.70E-24 |
| LysoPC(P-16:0)                                        | Glycerophospholipids                         | 0.67  | 0.52  | 0.78  | 0.61 | 2.14E-26 |
| Dihydro-3-(1-octenyl)-2,5-furandione                  | Oxolanes                                     | 0.68  | 0.54  | 0.78  | 0.66 | 6.19E-28 |
| LysoPC(16:0)                                          | Glycerophospholipids                         | 0.69  | 0.57  | 0.77  | 0.73 | 4.02E-28 |
| 5,12-dihydroxy-6,8,10,14,17-<br>eicosapentaenoic acid | Fatty Acyls                                  | 0.69  | 0.56  | 0.77  | 2.04 | 7.63E-29 |
| 3-Methyl-5-pentyl-2-furanundecanoic<br>acid           | Fatty Acyls                                  | 0.69  | 0.58  | 0.78  | 0.52 | 7.10E-29 |
| DG(22:5(7Z,10Z,13Z,16Z,19Z)/16:1(9Z)/<br>0:0)         | Glycerolipids                                | 0.69  | 0.56  | 0.79  | 0.79 | 6.18E-29 |
| MG(0:0/18:4(6Z,9Z,12Z,15Z)/0:0)                       | Glycerolipids                                | 0.71  | 0.59  | 0.79  | 1.05 | 1.32E-30 |
| DG(22:4(7Z,10Z,13Z,16Z)/18:3(6Z,9Z,12<br>Z)/0:0)      | Glycerolipids                                | 0.71  | 0.60  | 0.81  | 1.08 | 1.06E-30 |
| Lactapiperanol D                                      | Prenol lipids                                | 0.72  | 0.60  | 0.79  | 1.09 | 1.16E-31 |
| Styrene                                               | Benzene and substituted<br>derivatives       | 0.74  | 0.61  | 0.83  | 0.50 | 3.09E-34 |

|                                                           |                                     |      |      |      |      |          |
|-----------------------------------------------------------|-------------------------------------|------|------|------|------|----------|
| Capsiate                                                  | Phenols                             | 0.76 | 0.62 | 0.83 | 2.32 | 4.59E-37 |
| 2,6-Di-tert-butyl-4-ethylphenol                           | Benzene and substituted derivatives | 0.76 | 0.67 | 0.82 | 1.05 | 3.59E-37 |
| 4-Hydroxy-3-(16-methylheptadecyl)-2H-pyran-2-one          | Pyrans                              | 0.76 | 0.66 | 0.83 | 0.89 | 1.92E-37 |
| o-Ethyltoluene                                            | Benzene and substituted derivatives | 0.77 | 0.66 | 0.83 | 0.71 | 9.87E-39 |
| 6,10,14-Trimethyl-5,9,13-pentadecatrien-2-one             | Prenol lipids                       | 0.79 | 0.69 | 0.85 | 0.94 | 3.11E-42 |
| Indole                                                    | Indoles and derivatives             | 0.79 | 0.68 | 0.86 | 0.59 | 2.54E-43 |
| (9S,10E,12Z,15Z)-9-Hydroxy-10,12,15-octadecatrienoic acid | Lineolic acids and derivatives      | 0.80 | 0.68 | 0.86 | 1.38 | 3.29E-44 |
| Perillyl acetate                                          | Prenol lipids                       | 0.82 | 0.67 | 0.89 | 1.33 | 8.99E-48 |
| Nandrolone                                                | Steroids and steroid derivatives    | 0.82 | 0.72 | 0.88 | 2.92 | 4.97E-49 |
| 12,13-EpOME                                               | Fatty Acyls                         | 0.83 | 0.73 | 0.88 | 1.07 | 4.46E-50 |
| Dihydro-6-isopropyl-2,4-dimethyl-4H-1,3,5-dithiazine      | Azacyclic compounds                 | 0.83 | 0.74 | 0.88 | 1.54 | 1.04E-50 |
| Alpha-dimorphecolic acid                                  | Fatty Acyls                         | 0.83 | 0.72 | 0.89 | 1.79 | 1.71E-51 |
| Delta-12-Prostaglandin J2                                 | Fatty Acyls                         | 0.84 | 0.73 | 0.91 | 4.09 | 1.25E-53 |
| 13S-hydroxyoctadecadienoic acid                           | Fatty Acyls                         | 0.85 | 0.77 | 0.89 | 1.27 | 2.01E-55 |
| Quinceoxepine                                             | Ethers                              | 0.86 | 0.74 | 0.91 | 1.22 | 3.08E-57 |
| 4,8 Dimethylnonanoyl carnitine                            | Fatty Acyls                         | 0.87 | 0.77 | 0.92 | 2.00 | 5.65E-60 |
| Corchorifatty acid D                                      | Fatty Acyls                         | 0.87 | 0.77 | 0.91 | 2.02 | 5.65E-60 |
| Arachidonic acid                                          | Fatty Acyls                         | 0.87 | 0.77 | 0.92 | 1.90 | 3.41E-61 |
| (2'E,4'Z,7'Z,8E)-Colnelenic acid                          | Fatty Acyls                         | 0.88 | 0.78 | 0.93 | 2.54 | 3.12E-64 |

Metabolites with absolute PCA loading over 0.5 were presented. Bootstrap 95% CIs of loadings was generated by drawing 1,000 bootstrap samples.



**Table S2.** Characteristics of human milk PC 2

| Metabolites                                 | Class                              | PCA loadings | Bootstrap CI of loadings |       | Contribution (%) | FDR      |
|---------------------------------------------|------------------------------------|--------------|--------------------------|-------|------------------|----------|
|                                             |                                    |              | Lower                    | Upper |                  |          |
| Beta-D-Glucopyranuronic acid                | Organooxygen compounds             | -0.69        | -0.80                    | -0.36 | 0.76             | 2.89E-28 |
| Dihydroneopterin phosphate                  | Pteridines and derivatives         | -0.59        | -0.72                    | -0.26 | 0.49             | 3.76E-19 |
| 1-(Malonylamino)cyclopropanecarboxylic acid | Carboxylic acids and derivatives   | -0.57        | -0.73                    | -0.30 | 0.72             | 9.40E-18 |
| 3-Methylguanine                             | Imidazopyrimidines                 | -0.54        | -0.70                    | -0.27 | 0.52             | 7.39E-16 |
| Uridine                                     | Pyrimidine nucleosides             | -0.53        | -0.67                    | -0.21 | 0.41             | 2.64E-15 |
| Uracil                                      | Diazines                           | -0.53        | -0.67                    | -0.22 | 0.41             | 2.98E-15 |
| SM(d18:1/20:0)                              | Sphingolipids                      | 0.50         | 0.29                     | 0.64  | 0.48             | 1.91E-13 |
| PC(24:0/14:1(9Z))                           | Glycerophospholipids               | 0.50         | 0.19                     | 0.66  | 0.67             | 1.51E-13 |
| Palmitoylethanolamide                       | Carboximidic acids and derivatives | 0.51         | 0.31                     | 0.63  | 0.41             | 1.18E-13 |
| LysoPE(0:0/18:0)                            | Glycerophospholipids               | 0.51         | 0.30                     | 0.67  | 0.60             | 6.01E-14 |
| PE(P-18:1(11Z)/22:4(7Z,10Z,13Z,16Z))        | Glycerophospholipids               | 0.52         | 0.33                     | 0.67  | 0.54             | 2.49E-14 |
| PC(20:3(8Z,11Z,14Z)/14:0)                   | Glycerophospholipids               | 0.52         | 0.24                     | 0.65  | 0.62             | 1.06E-14 |
| PE(P-18:1(9Z)/18:1(9Z))                     | Glycerophospholipids               | 0.53         | 0.38                     | 0.72  | 0.48             | 6.71E-15 |
| PE(P-18:1(11Z)/18:3(6Z,9Z,12Z))             | Glycerophospholipids               | 0.53         | 0.33                     | 0.65  | 0.44             | 6.24E-15 |
| PS(18:0/22:6(4Z,7Z,10Z,13Z,16Z,19Z))        | Glycerophospholipids               | 0.53         | 0.21                     | 0.70  | 0.83             | 2.89E-15 |
| PC(20:3(5Z,8Z,11Z)/20:0)                    | Glycerophospholipids               | 0.53         | 0.25                     | 0.66  | 0.92             | 2.62E-15 |
| 6-Deoxohomodolichosterone                   | Steroids and steroid derivatives   | 0.54         | 0.30                     | 0.66  | 0.60             | 2.08E-15 |
| PC(20:4(8Z,11Z,14Z,17Z)/15:0)               | Glycerophospholipids               | 0.54         | 0.38                     | 0.68  | 0.69             | 9.97E-16 |
| PE(16:0/20:4(5Z,8Z,11Z,14Z))                | Glycerophospholipids               | 0.54         | 0.31                     | 0.68  | 0.66             | 6.44E-16 |
| PC(20:0/20:2(11Z,14Z))                      | Glycerophospholipids               | 0.54         | 0.24                     | 0.68  | 1.09             | 6.27E-16 |
| PI(20:3(5Z,8Z,11Z)/16:0)                    | Glycerophospholipids               | 0.55         | 0.26                     | 0.68  | 0.89             | 4.55E-16 |
| PC(16:0/16:0)                               | Glycerophospholipids               | 0.55         | 0.32                     | 0.73  | 0.72             | 3.28E-16 |
| N-Hexadecanoylpyrrolidine                   | Pyrrolidines                       | 0.55         | 0.32                     | 0.70  | 0.70             | 1.32E-16 |
| Oleamide                                    | Fatty Acyls                        | 0.56         | 0.37                     | 0.66  | 0.44             | 4.97E-17 |
| Polyoxyethylene (600) monoricinoleate       | Fatty Acyls                        | 0.56         | 0.35                     | 0.69  | 0.66             | 3.60E-17 |

|                                             |                      |      |      |      |      |          |
|---------------------------------------------|----------------------|------|------|------|------|----------|
| PI(20:2(11Z,14Z)/18:2(9Z,12Z))              | Glycerophospholipids | 0.56 | 0.20 | 0.72 | 0.62 | 3.39E-17 |
| PS(14:0/22:2(13Z,16Z))                      | Glycerophospholipids | 0.57 | 0.21 | 0.70 | 0.69 | 2.04E-17 |
| PC(18:3(6Z,9Z,12Z)/15:0)                    | Glycerophospholipids | 0.57 | 0.33 | 0.72 | 0.61 | 1.27E-17 |
| PE(18:1(9Z)/16:0)                           | Glycerophospholipids | 0.58 | 0.36 | 0.82 | 0.73 | 2.63E-18 |
| PC(22:2(13Z,16Z)/15:0)                      | Glycerophospholipids | 0.58 | 0.23 | 0.71 | 0.66 | 1.64E-18 |
| PI(22:5(4Z,7Z,10Z,13Z,16Z)/16:0)            | Glycerophospholipids | 0.59 | 0.23 | 0.77 | 0.45 | 4.19E-19 |
| SM(d18:0/18:1(9Z))                          | Sphingolipids        | 0.59 | 0.40 | 0.69 | 0.66 | 3.57E-19 |
| LysoPC(20:3(5Z,8Z,11Z))                     | Glycerophospholipids | 0.59 | 0.36 | 0.73 | 0.79 | 1.92E-19 |
| PC(20:0/14:0)                               | Glycerophospholipids | 0.60 | 0.28 | 0.73 | 0.67 | 6.44E-20 |
| SM(d18:1/24:1(15Z))                         | Sphingolipids        | 0.60 | 0.37 | 0.71 | 0.69 | 4.32E-20 |
| PE(22:5(4Z,7Z,10Z,13Z,16Z)/16:0)            | Glycerophospholipids | 0.61 | 0.39 | 0.76 | 0.74 | 4.02E-21 |
| PC(14:0/14:0)                               | Glycerophospholipids | 0.61 | 0.29 | 0.73 | 0.92 | 4.02E-21 |
| PE(22:6(4Z,7Z,10Z,13Z,16Z,19Z)/P-18:1(11Z)) | Glycerophospholipids | 0.62 | 0.31 | 0.71 | 0.51 | 3.15E-21 |
| SM(d18:1/18:1(9Z))                          | Sphingolipids        | 0.62 | 0.41 | 0.72 | 0.68 | 1.81E-21 |
| Cohibin A                                   | Fatty Acyls          | 0.63 | 0.33 | 0.74 | 1.22 | 3.34E-22 |
| PC(22:5(7Z,10Z,13Z,16Z,19Z)/15:0)           | Glycerophospholipids | 0.64 | 0.45 | 0.74 | 0.95 | 5.27E-23 |
| SM(d18:0/14:0)                              | Sphingolipids        | 0.65 | 0.38 | 0.73 | 0.75 | 7.15E-24 |
| PC(18:3(6Z,9Z,12Z)/18:0)                    | Glycerophospholipids | 0.65 | 0.36 | 0.79 | 0.64 | 1.35E-24 |
| PC(P-16:0/18:4(6Z,9Z,12Z,15Z))              | Glycerophospholipids | 0.66 | 0.45 | 0.75 | 0.77 | 3.58E-25 |
| PE(P-18:1(9Z)/20:5(5Z,8Z,11Z,14Z,17Z))      | Glycerophospholipids | 0.66 | 0.41 | 0.77 | 0.66 | 2.37E-25 |
| PC(20:1(11Z)/14:0)                          | Glycerophospholipids | 0.67 | 0.31 | 0.78 | 0.81 | 1.41E-26 |
| PE(P-18:0/22:4(7Z,10Z,13Z,16Z))             | Glycerophospholipids | 0.68 | 0.41 | 0.79 | 0.70 | 2.75E-27 |
| PE(22:2(13Z,16Z)/18:1(11Z))                 | Glycerophospholipids | 0.69 | 0.35 | 0.78 | 0.84 | 5.11E-28 |
| PC(16:1(9Z)/16:1(9Z))                       | Glycerophospholipids | 0.69 | 0.48 | 0.78 | 0.94 | 1.25E-28 |
| SM(d18:1/16:0)                              | Sphingolipids        | 0.71 | 0.43 | 0.81 | 0.87 | 3.23E-30 |
| PC(22:4(7Z,10Z,13Z,16Z)/14:0)               | Glycerophospholipids | 0.71 | 0.37 | 0.82 | 0.75 | 3.22E-30 |
| Epomusenin A                                | Fatty Acyls          | 0.72 | 0.49 | 0.80 | 0.62 | 1.43E-31 |
| PC(15:0/15:0)                               | Glycerophospholipids | 0.72 | 0.42 | 0.82 | 1.15 | 9.96E-32 |
| PC(20:2(11Z,14Z)/20:4(5Z,8Z,11Z,14Z))       | Glycerophospholipids | 0.72 | 0.41 | 0.81 | 0.97 | 9.96E-32 |

|                                              |                      |      |      |      |      |          |
|----------------------------------------------|----------------------|------|------|------|------|----------|
| PE(P-18:0/18:2(9Z,12Z))                      | Glycerophospholipids | 0.72 | 0.49 | 0.81 | 0.63 | 3.28E-32 |
| SM(d17:1/24:1(15Z))                          | Sphingolipids        | 0.72 | 0.50 | 0.79 | 0.78 | 1.59E-32 |
| Cohibin C                                    | Fatty Acyls          | 0.73 | 0.38 | 0.85 | 0.86 | 3.72E-33 |
| 2-acetyl-1-alkyl-sn-glycero-3-phosphocholine | Glycerophospholipids | 0.74 | 0.56 | 0.82 | 1.18 | 6.17E-35 |
| PC(20:2(11Z,14Z)/15:0)                       | Glycerophospholipids | 0.76 | 0.41 | 0.85 | 0.79 | 3.83E-37 |
| PC(16:1(9Z)/15:0)                            | Glycerophospholipids | 0.76 | 0.40 | 0.87 | 0.87 | 1.22E-37 |
| PC(22:5(7Z,10Z,13Z,16Z,19Z)/16:1(9Z))        | Glycerophospholipids | 0.76 | 0.45 | 0.83 | 0.90 | 6.38E-38 |
| PC(22:2(13Z,16Z)/16:1(9Z))                   | Glycerophospholipids | 0.77 | 0.38 | 0.86 | 0.85 | 2.37E-38 |
| PC(20:2(11Z,14Z)/14:0)                       | Glycerophospholipids | 0.77 | 0.50 | 0.85 | 0.67 | 1.71E-38 |
| PC(22:6(4Z,7Z,10Z,13Z,16Z,19Z)/15:0)         | Glycerophospholipids | 0.77 | 0.55 | 0.83 | 1.04 | 1.07E-39 |
| PE(P-16:0/20:4(5Z,8Z,11Z,14Z))               | Glycerophospholipids | 0.78 | 0.53 | 0.87 | 0.74 | 8.74E-40 |
| PC(22:5(4Z,7Z,10Z,13Z,16Z)/16:0)             | Glycerophospholipids | 0.78 | 0.46 | 0.86 | 0.73 | 5.86E-41 |
| PC(18:1(11Z)/14:0)                           | Glycerophospholipids | 0.78 | 0.45 | 0.86 | 0.89 | 4.17E-41 |
| PC(18:2(9Z,12Z)/18:0)                        | Glycerophospholipids | 0.79 | 0.44 | 0.87 | 0.74 | 2.61E-42 |
| PC(20:1(11Z)/20:4(5Z,8Z,11Z,14Z))            | Glycerophospholipids | 0.80 | 0.45 | 0.88 | 1.03 | 2.13E-43 |
| PC(22:4(7Z,10Z,13Z,16Z)/15:0)                | Glycerophospholipids | 0.81 | 0.52 | 0.89 | 1.05 | 4.53E-45 |
| PE(20:4(5Z,8Z,11Z,14Z)/P-18:1(11Z))          | Glycerophospholipids | 0.81 | 0.53 | 0.86 | 0.66 | 1.80E-45 |
| PC(20:3(8Z,11Z,14Z)/15:0)                    | Glycerophospholipids | 0.84 | 0.56 | 0.88 | 1.07 | 7.18E-52 |
| PC(22:5(4Z,7Z,10Z,13Z,16Z)/15:0)             | Glycerophospholipids | 0.85 | 0.58 | 0.90 | 1.18 | 4.20E-54 |
| PE(20:0/18:4(6Z,9Z,12Z,15Z))                 | Glycerophospholipids | 0.85 | 0.65 | 0.89 | 0.92 | 8.97E-55 |
| Montecristin                                 | Fatty Acyls          | 0.87 | 0.66 | 0.90 | 1.08 | 5.11E-59 |
| PE(16:0/18:2(9Z,12Z))                        | Glycerophospholipids | 0.87 | 0.65 | 0.90 | 1.02 | 1.20E-59 |

Metabolites with a absolute PCA loading over 0.5 were presented. Bootstrap 95% CIs of loadings was generated by drawing 1,000 bootstrap samples.

**Table S3.** Details of PC 1 results

| Metabolites | Class | PCA loadings | Bootstrap CI of loadings |       | Contribution (%) | FDR |
|-------------|-------|--------------|--------------------------|-------|------------------|-----|
|             |       |              | Lower                    | Upper |                  |     |

|                                                |                                     |       |       |       |      |          |
|------------------------------------------------|-------------------------------------|-------|-------|-------|------|----------|
| 3,3,5-triiodo-L-thyronine-beta-D-glucuronoside | Carboxylic acids and derivatives    | 0.00  | -0.15 | 0.18  | 0.00 | 9.80E-01 |
| Cellobiose                                     | Organooxygen compounds              | -0.04 | -0.17 | 0.09  | 0.00 | 6.17E-01 |
| Adenine                                        | Imidazopyrimidines                  | -0.56 | -0.66 | -0.40 | 0.42 | 3.88E-17 |
| 1-Amino-propan-2-ol                            | Organonitrogen compounds            | 0.14  | 0.00  | 0.27  | 0.02 | 7.08E-02 |
| 1-Pyrroline                                    | Pyrrolines                          | -0.44 | -0.56 | -0.26 | 0.15 | 2.63E-10 |
| Rheidin A                                      | Anthracenes                         | -0.34 | -0.49 | -0.20 | 0.12 | 1.83E-06 |
| 1-Kestose                                      | Organooxygen compounds              | 0.07  | -0.10 | 0.23  | 0.00 | 4.22E-01 |
| Niacinamide                                    | Pyridines and derivatives           | 0.56  | 0.40  | 0.68  | 0.38 | 2.51E-17 |
| 5-Methylcytidine                               | Pyrimidine nucleosides              | -0.24 | -0.42 | -0.06 | 0.03 | 1.14E-03 |
| Yuccaol C                                      | 2-arylbenzofuran flavonoids         | 0.09  | -0.07 | 0.24  | 0.01 | 2.56E-01 |
| Adenosine                                      | Purine nucleosides                  | -0.63 | -0.74 | -0.50 | 0.63 | 8.81E-23 |
| 1-Methylinosine                                | Purine nucleosides                  | -0.33 | -0.49 | -0.13 | 0.08 | 4.37E-06 |
| Choline                                        | Organonitrogen compounds            | -0.17 | -0.31 | -0.01 | 0.01 | 2.56E-02 |
| D-Proline                                      | Carboxylic acids and derivatives    | 0.06  | -0.13 | 0.26  | 0.00 | 4.38E-01 |
| 1H-Pyrrole-2-carboxaldehyde                    | Organooxygen compounds              | 0.38  | 0.24  | 0.50  | 0.05 | 1.36E-07 |
| 4-Aminophenol                                  | Benzene and substituted derivatives | -0.27 | -0.40 | -0.11 | 0.04 | 3.07E-04 |
| Pyrrolidonecarboxylic acid                     | Carboxylic acids and derivatives    | -0.62 | -0.75 | -0.45 | 0.26 | 6.72E-22 |
| Uracil                                         | Diazines                            | 0.04  | -0.19 | 0.27  | 0.00 | 6.58E-01 |

|                                                     |                                           |       |       |       |      |          |
|-----------------------------------------------------|-------------------------------------------|-------|-------|-------|------|----------|
| 5-Aminopentanoic acid                               | Carboxylic acids and derivatives          | 0.06  | -0.10 | 0.20  | 0.00 | 4.79E-01 |
| 5,12-dihydroxy-6,8,10,14,17-eicosapentaenoic acid   | NA                                        | 0.69  | 0.56  | 0.77  | 2.04 | 7.63E-29 |
| Kynurenic acid                                      | Quinolines and derivatives                | -0.06 | -0.20 | 0.09  | 0.00 | 4.83E-01 |
| Cytidine monophosphate                              | Pyrimidine nucleotides                    | -0.45 | -0.59 | -0.27 | 0.23 | 1.23E-10 |
| N2,N2-Dimethylguanosine                             | Purine nucleosides                        | -0.36 | -0.49 | -0.20 | 0.08 | 4.72E-07 |
| Gonyautoxin VI                                      | Saxitoxins, gonyautoxins, and derivatives | -0.09 | -0.26 | 0.08  | 0.01 | 2.81E-01 |
| 4-(3,4-Dihydroxyphenyl)-2-hydroxy-1H-phenalen-1-one | Naphthalenes                              | 0.10  | -0.03 | 0.23  | 0.00 | 2.02E-01 |
| Guanine                                             | Imidazopyrimidines                        | -0.38 | -0.52 | -0.20 | 0.17 | 1.38E-07 |
| Nicotinamide ribotide                               | NA                                        | 0.46  | 0.28  | 0.59  | 0.39 | 4.81E-11 |
| Prolyl-Aspartate                                    | Carboxylic acids and derivatives          | 0.19  | 0.00  | 0.35  | 0.03 | 1.07E-02 |
| 1-Methylnicotinamide                                | Pyridines and derivatives                 | 0.23  | 0.07  | 0.39  | 0.03 | 1.76E-03 |
| Pipecolic acid                                      | Carboxylic acids and derivatives          | 0.39  | 0.24  | 0.51  | 0.12 | 4.27E-08 |
| N-Ornithyl-L-taurine                                | Carboxylic acids and derivatives          | 0.05  | -0.14 | 0.20  | 0.00 | 5.07E-01 |
| D-Maltose                                           | Organooxygen compounds                    | -0.51 | -0.64 | -0.31 | 0.18 | 6.67E-14 |
| 2-O-(6-Phospho-alpha-mannosyl)-D-glycerate          | Organooxygen compounds                    | 0.04  | -0.11 | 0.17  | 0.00 | 6.54E-01 |
| Taurine                                             | Organic sulfonic acids and derivatives    | 0.09  | -0.07 | 0.23  | 0.01 | 2.73E-01 |

|                                           |                                     |       |       |       |      |          |
|-------------------------------------------|-------------------------------------|-------|-------|-------|------|----------|
| 2-O-Galloylsucrose                        | Benzene and substituted derivatives | -0.49 | -0.60 | -0.34 | 0.45 | 8.74E-13 |
| L-Asparagine                              | Carboxylic acids and derivatives    | -0.23 | -0.37 | -0.06 | 0.06 | 1.68E-03 |
| Pyrrolidine                               | Pyrrolidines                        | -0.25 | -0.39 | -0.11 | 0.09 | 7.73E-04 |
| Protoanemonin                             | Dihydrofurans                       | -0.01 | -0.20 | 0.17  | 0.00 | 9.21E-01 |
| Xanthotoxol glucoside                     | Coumarins and derivatives           | -0.21 | -0.33 | -0.07 | 0.04 | 5.75E-03 |
| L-Threonine                               | Carboxylic acids and derivatives    | -0.30 | -0.42 | -0.13 | 0.07 | 4.79E-05 |
| 1-Methyladenosine                         | Purine nucleosides                  | -0.17 | -0.35 | 0.03  | 0.02 | 2.55E-02 |
| Propionylcarnitine                        | Fatty Acyls                         | 0.23  | 0.04  | 0.39  | 0.04 | 1.93E-03 |
| Phenylacetaldehyde                        | Benzene and substituted derivatives | 0.13  | -0.08 | 0.29  | 0.02 | 9.43E-02 |
| N4-Acetylcytidine                         | Pyrimidine nucleosides              | -0.27 | -0.41 | -0.12 | 0.12 | 3.00E-04 |
| 2,5-Dihydro-2,4-dimethyloxazole           | Azolines                            | 0.05  | -0.11 | 0.20  | 0.01 | 5.21E-01 |
| 3-Methylhistidine                         | Carboxylic acids and derivatives    | 0.06  | -0.12 | 0.24  | 0.01 | 4.57E-01 |
| Sphinganine                               | Organonitrogen compounds            | -0.11 | -0.25 | 0.02  | 0.05 | 1.54E-01 |
| Chondroitin                               | Organooxygen compounds              | -0.19 | -0.37 | 0.01  | 0.02 | 1.35E-02 |
| 2-Methylfuran                             | Heteroaromatic compounds            | 0.09  | -0.08 | 0.22  | 0.05 | 2.37E-01 |
| trans-3,3',4',5,5',7-Hexahydroxyflavanone | NA                                  | 0.03  | -0.15 | 0.18  | 0.00 | 7.64E-01 |
| Acetylhydrazine                           | Carboxylic acids and derivatives    | -0.44 | -0.59 | -0.23 | 0.11 | 2.52E-10 |
| Turanose                                  | Fatty Acyls                         | -0.16 | -0.31 | 0.02  | 0.02 | 3.82E-02 |

|                           |                                     |       |       |       |      |          |
|---------------------------|-------------------------------------|-------|-------|-------|------|----------|
| L-Palmitoylcarnitine      | Fatty Acyls                         | 0.33  | 0.12  | 0.51  | 0.27 | 5.41E-06 |
| Lacto-N-fucopentaose III  | Organooxygen compounds              | -0.08 | -0.25 | 0.11  | 0.01 | 3.43E-01 |
| 3-Acetamidobutanal        | Organooxygen compounds              | 0.13  | -0.01 | 0.27  | 0.01 | 9.51E-02 |
| 4-Aminohippuric acid      | Benzene and substituted derivatives | -0.19 | -0.38 | 0.01  | 0.03 | 1.11E-02 |
| L-Phenylalanine           | Carboxylic acids and derivatives    | -0.07 | -0.22 | 0.13  | 0.00 | 3.78E-01 |
| Methyl 2-furoate          | Furans                              | 0.01  | -0.17 | 0.17  | 0.00 | 8.91E-01 |
| N-Hexadecanoylpyrrolidine | Pyrrolidines                        | 0.36  | 0.10  | 0.54  | 0.18 | 5.17E-07 |
| 1-Methylhypoxanthine      | NA                                  | -0.31 | -0.47 | -0.11 | 0.07 | 2.36E-05 |
| erythro-Isoleucine        | NA                                  | 0.10  | -0.06 | 0.26  | 0.01 | 2.19E-01 |
| L-Acetylcarnitine         | Fatty Acyls                         | -0.01 | -0.18 | 0.15  | 0.00 | 8.69E-01 |
| Trigonelline              |                                     | 0.20  | 0.06  | 0.34  | 0.08 | 6.81E-03 |
| D-Serine                  | Carboxylic acids and derivatives    | -0.33 | -0.49 | -0.13 | 0.09 | 5.90E-06 |
| 1-Methylguanosine         | Purine nucleosides                  | -0.35 | -0.48 | -0.18 | 0.08 | 1.65E-06 |
| Uridine                   | Pyrimidine nucleosides              | 0.07  | -0.14 | 0.29  | 0.00 | 3.56E-01 |
| 2,5-Dimethyloxazole       | Azoles                              | 0.15  | -0.05 | 0.31  | 0.03 | 4.96E-02 |
| Adenosine 2'-phosphate    | Organooxygen compounds              | -0.15 | -0.34 | 0.08  | 0.05 | 4.94E-02 |
| Cytidine                  | Pyrimidine nucleosides              | 0.51  | 0.32  | 0.65  | 0.30 | 6.67E-14 |
| 5'-Methylthioadenosine    | 5'-deoxyribonucleosides             | -0.57 | -0.68 | -0.49 | 0.39 | 9.50E-18 |
| L-Lysine                  | Carboxylic acids and derivatives    | 0.46  | 0.32  | 0.57  | 0.22 | 4.87E-11 |
| Piperidine                | Piperidines                         | -0.01 | -0.17 | 0.16  | 0.00 | 8.91E-01 |
| 3-Methylguanine           | Imidazopyrimidines                  | -0.51 | -0.66 | -0.28 | 0.28 | 4.43E-14 |

|                            |                                     |       |       |       |      |          |
|----------------------------|-------------------------------------|-------|-------|-------|------|----------|
| Thiamine monophosphate     | Diazines                            | 0.29  | 0.12  | 0.45  | 0.08 | 9.82E-05 |
| Sorbose 1-phosphate        | Organooxygen compounds              | -0.20 | -0.37 | -0.02 | 0.02 | 7.75E-03 |
| Trimethylamine N-oxide     | Organonitrogen compounds            | 0.19  | 0.03  | 0.33  | 0.04 | 1.35E-02 |
| D-Glutamine                | Carboxylic acids and derivatives    | -0.73 | -0.81 | -0.58 | 0.76 | 3.39E-33 |
| 2-Butenal                  | NA                                  | 0.14  | -0.06 | 0.31  | 0.03 | 7.71E-02 |
| Styrene                    | Benzene and substituted derivatives | 0.74  | 0.61  | 0.83  | 0.50 | 3.09E-34 |
| Anserine                   | Peptidomimetics                     | -0.40 | -0.49 | -0.28 | 0.24 | 2.64E-08 |
| Oleamide                   | Fatty Acyls                         | 0.29  | 0.04  | 0.50  | 0.07 | 7.90E-05 |
| Solasodine                 | Steroids and steroid derivatives    | -0.08 | -0.23 | 0.08  | 0.03 | 3.02E-01 |
| Dihydroneopterin phosphate | Pteridines and derivatives          | -0.39 | -0.56 | -0.15 | 0.13 | 4.24E-08 |
| Diethanolamine             | Organonitrogen compounds            | 0.15  | -0.01 | 0.28  | 0.02 | 5.08E-02 |
| 2-Fucosyllactose           | Organooxygen compounds              | -0.08 | -0.28 | 0.10  | 0.01 | 3.06E-01 |
| Nicotine                   | Pyridines and derivatives           | -0.08 | -0.21 | 0.08  | 0.01 | 3.41E-01 |
| Spinacetin 3-gentiobioside | Flavonoids                          | 0.04  | -0.14 | 0.19  | 0.01 | 6.38E-01 |
| Citrulline                 | Carboxylic acids and derivatives    | -0.63 | -0.73 | -0.46 | 0.32 | 1.73E-22 |
| 4-Hydroxybenzaldehyde      | Organooxygen compounds              | -0.01 | -0.18 | 0.15  | 0.00 | 8.90E-01 |
| Prolyl-Arginine            | Carboxylic acids and derivatives    | 0.50  | 0.37  | 0.61  | 0.79 | 3.02E-13 |
| Pantothenic acid           | Alcohols and polyols                | 0.02  | -0.12 | 0.14  | 0.00 | 8.04E-01 |

|                                                                   |                                     |       |       |       |      |          |
|-------------------------------------------------------------------|-------------------------------------|-------|-------|-------|------|----------|
| L-Valine                                                          | Carboxylic acids and derivatives    | -0.25 | -0.41 | -0.06 | 0.04 | 7.24E-04 |
| 3-Amino-2-piperidone                                              | Carboxylic acids and derivatives    | 0.16  | -0.02 | 0.30  | 0.02 | 3.54E-02 |
| Uralenneoside                                                     | Benzene and substituted derivatives | 0.04  | -0.12 | 0.18  | 0.00 | 6.15E-01 |
| Lactaldehyde                                                      | Organooxygen compounds              | -0.38 | -0.54 | -0.28 | 0.18 | 8.76E-08 |
| Mesalazine                                                        | Benzene and substituted derivatives | -0.04 | -0.21 | 0.13  | 0.00 | 6.10E-01 |
| Muscomin                                                          | Homoisoflavonoids                   | -0.22 | -0.37 | -0.04 | 0.03 | 3.30E-03 |
| Urocanic acid                                                     | Azoles                              | -0.04 | -0.19 | 0.10  | 0.00 | 5.90E-01 |
| Dimethyl dialkyl ammonium chloride                                | Quaternary ammonium salts           | 0.23  | 0.06  | 0.38  | 0.26 | 2.18E-03 |
| NAD                                                               | (5'->5')-dinucleotides              | -0.27 | -0.44 | -0.09 | 0.12 | 2.13E-04 |
| Sialyl-Lewis X                                                    | Organooxygen compounds              | -0.30 | -0.46 | -0.13 | 0.13 | 3.68E-05 |
| N-Acetylhistidine                                                 | Carboxylic acids and derivatives    | 0.34  | 0.18  | 0.47  | 0.08 | 2.47E-06 |
| 3alpha,4,5,7alpha-Tetrahydro-5-hydroxy-1H-isoindole-1,3(2H)-dione | Isoindoles and derivatives          | -0.20 | -0.38 | 0.01  | 0.04 | 7.95E-03 |
| 2-Acetyl-3,6-dimethylpyrazine                                     | Carbonyl compounds                  | -0.01 | -0.16 | 0.14  | 0.00 | 8.91E-01 |
| Homo-L-arginine                                                   | Carboxylic acids and derivatives    | -0.46 | -0.57 | -0.32 | 0.25 | 2.45E-11 |
| 3,4',5,6-Tetrahydroxy-3',7-dimethoxyflavone 3-glucuronide         | Flavonoids                          | -0.39 | -0.51 | -0.27 | 0.24 | 2.91E-08 |
| L-Arginine                                                        | Carboxylic acids and derivatives    | -0.05 | -0.18 | 0.09  | 0.00 | 5.07E-01 |

|                                                           |                                  |       |       |       |      |          |
|-----------------------------------------------------------|----------------------------------|-------|-------|-------|------|----------|
| Ornithine                                                 | Carboxylic acids and derivatives | 0.28  | 0.13  | 0.41  | 0.08 | 1.50E-04 |
| Biliverdin                                                | Tetrapyrroles and derivatives    | -0.83 | -0.87 | -0.74 | 1.82 | 4.46E-50 |
| 4,8 Dimethylnonanoyl carnitine                            | Fatty Acyls                      | 0.87  | 0.77  | 0.92  | 2.00 | 5.65E-60 |
| S-Adenosylmethionine                                      | 5'-deoxyribonucleosides          | -0.14 | -0.30 | 0.03  | 0.03 | 6.46E-02 |
| 1,2,3,4-Tetrahydro-b-carboline-1,3-dicarboxylic acid      | Harmala alkaloids                | -0.04 | -0.19 | 0.09  | 0.00 | 5.95E-01 |
| Spinatocide                                               | Flavonoids                       | -0.49 | -0.60 | -0.36 | 0.40 | 1.37E-12 |
| 5-Methyl-2-furancarboxaldehyde                            | Carbonyl compounds               | 0.10  | -0.09 | 0.25  | 0.06 | 2.22E-01 |
| Tryptophan                                                | NA                               | 0.00  | -0.19 | 0.21  | 0.00 | 9.51E-01 |
| O-Acetylserine                                            | Carboxylic acids and derivatives | -0.23 | -0.39 | -0.05 | 0.02 | 2.28E-03 |
| (9S,10E,12Z,15Z)-9-Hydroxy-10,12,15-octadecatrienoic acid | Lineolic acids and derivatives   | 0.80  | 0.68  | 0.86  | 1.38 | 3.29E-44 |
| FAPy-adenine                                              | Diazines                         | -0.12 | -0.29 | 0.03  | 0.02 | 1.22E-01 |
| 5-HEPE                                                    | Fatty Acyls                      | 0.45  | 0.30  | 0.58  | 0.75 | 7.96E-11 |
| 7-Aminoclonazepam                                         | Benzodiazepines                  | -0.18 | -0.36 | 0.02  | 0.08 | 1.54E-02 |
| Linoleamide                                               | Fatty Acyls                      | 0.04  | -0.22 | 0.34  | 0.00 | 6.58E-01 |
| Gerberinol                                                | Coumarins and derivatives        | 0.02  | -0.15 | 0.16  | 0.00 | 7.75E-01 |
| Saccharopine                                              | Carboxylic acids and derivatives | -0.32 | -0.47 | -0.15 | 0.18 | 7.81E-06 |
| Pyroglutamic acid                                         | Carboxylic acids and derivatives | -0.67 | -0.78 | -0.51 | 2.21 | 2.14E-26 |
| LysoPE(18:1(9Z)/0:0)                                      | Glycerophospholipids             | -0.16 | -0.37 | 0.06  | 0.04 | 3.88E-02 |
| Octadecanamide                                            | Fatty Acyls                      | 0.08  | -0.13 | 0.29  | 0.01 | 3.01E-01 |
| DG(22:5(7Z,10Z,13Z,16Z,19Z)/16:1(9Z)/0:0)                 | Glycerolipids                    | 0.69  | 0.56  | 0.79  | 0.79 | 6.18E-29 |

|                                    |                                               |       |       |       |      |          |
|------------------------------------|-----------------------------------------------|-------|-------|-------|------|----------|
| Trimethylaminoacetone              | Organooxygen compounds                        | 0.23  | 0.06  | 0.37  | 0.03 | 2.62E-03 |
| Cholesterol                        | Steroids and steroid derivatives              | 0.54  | 0.40  | 0.66  | 0.58 | 1.35E-15 |
| 1-Salicylate glucuronide           | Organooxygen compounds                        | -0.24 | -0.41 | -0.04 | 0.04 | 1.49E-03 |
| Racemethionine                     | NA                                            | -0.07 | -0.25 | 0.08  | 0.00 | 3.52E-01 |
| Allysine                           | Carboxylic acids and derivatives              | -0.05 | -0.20 | 0.10  | 0.00 | 5.66E-01 |
| Pyro-L-glutaminy-L-glutamine       | Carboxylic acids and derivatives              | -0.37 | -0.51 | -0.22 | 0.11 | 2.14E-07 |
| UDP-N-acetyl-alpha-D-galactosamine | Pyrimidine nucleotides                        | -0.28 | -0.42 | -0.14 | 0.16 | 1.14E-04 |
| 4-Amino-2-methylenebutanoic acid   | Carboxylic acids and derivatives              | 0.17  | -0.02 | 0.32  | 0.03 | 3.10E-02 |
| 2-Furanmethanol                    | Heteroaromatic compounds                      | 0.16  | -0.01 | 0.30  | 0.04 | 3.43E-02 |
| Ecgonine                           | Tropane alkaloids                             | 0.12  | -0.06 | 0.27  | 0.01 | 1.11E-01 |
| 5,6-Dihydroxyindole                | Indoles and derivatives                       | -0.04 | -0.19 | 0.10  | 0.00 | 6.02E-01 |
| Valyl-Lysine                       | Carboxylic acids and derivatives              | -0.36 | -0.50 | -0.18 | 0.07 | 4.69E-07 |
| AICA-riboside                      | Imidazole ribonucleosides and ribonucleotides | -0.17 | -0.34 | 0.00  | 0.05 | 2.57E-02 |
| Beta-D-Glucopyranuronic acid       | Organooxygen compounds                        | -0.42 | -0.62 | -0.12 | 0.17 | 3.42E-09 |
| 3-Oxohexadecanoyl-CoA              | Fatty Acyls                                   | -0.15 | -0.35 | 0.05  | 0.04 | 4.38E-02 |
| Homoarecoline                      |                                               | -0.11 | -0.24 | 0.04  | 0.01 | 1.58E-01 |
| Lacto-N-difucopentaose II          | Organooxygen compounds                        | 0.06  | -0.13 | 0.21  | 0.00 | 4.56E-01 |

|                                  |                                           |       |       |       |      |          |
|----------------------------------|-------------------------------------------|-------|-------|-------|------|----------|
| LysoPE(0:0/22:4(7Z,10Z,13Z,16Z)) | Glycerophospholipids                      | -0.10 | -0.32 | 0.14  | 0.01 | 2.18E-01 |
| alpha-Zearalenol                 | Macrolides and analogues                  | -0.47 | -0.61 | -0.25 | 0.17 | 1.19E-11 |
| L-Tyrosine                       | Carboxylic acids and derivatives          | -0.06 | -0.19 | 0.13  | 0.01 | 4.25E-01 |
| LysoPE(20:1(11Z)/0:0)            | Glycerophospholipids                      | 0.43  | 0.26  | 0.58  | 0.29 | 5.99E-10 |
| Thiamine                         | Diazines                                  | -0.41 | -0.52 | -0.26 | 0.27 | 4.07E-09 |
| LysoPE(16:0/0:0)                 | Glycerophospholipids                      | 0.63  | 0.50  | 0.73  | 0.57 | 8.89E-23 |
| Guanosine                        | Purine nucleosides                        | -0.37 | -0.51 | -0.21 | 0.19 | 2.24E-07 |
| LysoPE(0:0/18:3(6Z,9Z,12Z))      | Glycerophospholipids                      | -0.30 | -0.45 | -0.13 | 0.16 | 5.00E-05 |
| beta-Lactose                     | Carbohydrates and carbohydrate conjugates | 0.50  | 0.35  | 0.62  | 0.59 | 1.94E-13 |
| 3,4,5-Trimethoxycinnamic acid    | Cinnamic acids and derivatives            | -0.21 | -0.36 | -0.03 | 0.04 | 5.75E-03 |
| Delta-12-Prostaglandin J2        | Fatty Acyls                               | 0.84  | 0.73  | 0.91  | 4.09 | 1.25E-53 |
| N-Acetyl-L-alanine               | Carboxylic acids and derivatives          | 0.16  | 0.01  | 0.30  | 0.03 | 3.18E-02 |
| 3-Hydroxyisovalerylcarnitine     | Fatty Acyls                               | -0.12 | -0.29 | 0.06  | 0.02 | 1.37E-01 |
| Nicotinic acid                   | Pyridines and derivatives                 | 0.13  | -0.07 | 0.31  | 0.01 | 9.96E-02 |
| 4-Acetyl-3-methylpyridine        | Carbonyl compounds                        | 0.03  | -0.13 | 0.20  | 0.00 | 7.22E-01 |
| Phosphocreatine                  | Carboxylic acids and derivatives          | 0.23  | 0.08  | 0.36  | 0.30 | 2.05E-03 |
| Palmitoylethanolamide            | Carboximidic acids and derivatives        | 0.32  | 0.09  | 0.51  | 0.10 | 1.30E-05 |
| 3'-Sialyllactose                 | Organooxygen compounds                    | -0.03 | -0.22 | 0.14  | 0.00 | 7.26E-01 |
| 2-Aminoacrylic acid              | Carboxylic acids and derivatives          | -0.28 | -0.46 | -0.07 | 0.22 | 1.30E-04 |
| 2,4-Dimethyloxazole              | Azoles                                    | 0.26  | 0.12  | 0.38  | 0.02 | 4.69E-04 |

|                                       |                                     |       |       |       |      |          |
|---------------------------------------|-------------------------------------|-------|-------|-------|------|----------|
| LysoPE(0:0/20:4(5Z,8Z,11Z,14Z))       | Glycerophospholipids                | -0.20 | -0.41 | 0.03  | 0.06 | 6.81E-03 |
| 2-Azetidinecarboxylic acid            | NA                                  | -0.26 | -0.41 | -0.08 | 0.03 | 4.49E-04 |
| Epsilon-caprolactam                   | Lactams                             | 0.17  | 0.03  | 0.31  | 0.03 | 2.81E-02 |
| Polyoxyethylene (600) monoricinoleate | Fatty Acyls                         | 0.38  | 0.12  | 0.56  | 0.18 | 1.50E-07 |
| 1,3-Diisopropylbenzene                | Benzene and substituted derivatives | 0.37  | 0.23  | 0.49  | 0.11 | 3.49E-07 |
| Triethanolamine                       | Amines                              | -0.07 | -0.20 | 0.08  | 0.01 | 3.98E-01 |
| Aminofructose 6-phosphate             | Organooxygen compounds              | -0.02 | -0.17 | 0.14  | 0.00 | 8.18E-01 |
| 1-Methyl-1,3-cyclohexadiene           | Olefins                             | 0.63  | 0.49  | 0.73  | 0.32 | 1.07E-22 |
| Epidermin                             | Organooxygen compounds              | 0.45  | 0.28  | 0.59  | 0.26 | 1.07E-10 |
| Proline betaine                       | Carboxylic acids and derivatives    | 0.11  | -0.03 | 0.28  | 0.03 | 1.69E-01 |
| O-Phosphotyrosine                     | Carboxylic acids and derivatives    | 0.20  | 0.04  | 0.36  | 0.03 | 8.49E-03 |
| N-Acetylputrescine                    | Carboximidic acids and derivatives  | -0.29 | -0.42 | -0.11 | 0.08 | 8.83E-05 |
| Dehydrophytosphingosine               | Organonitrogen compounds            | 0.25  | 0.07  | 0.41  | 0.11 | 5.99E-04 |
| 13S-hydroxyoctadecadienoic acid       | Fatty Acyls                         | 0.85  | 0.77  | 0.89  | 1.27 | 2.01E-55 |
| o-Xylene                              | Benzene and substituted derivatives | 0.65  | 0.51  | 0.74  | 0.40 | 2.70E-24 |
| Asparaginyl-Hydroxyproline            | Carboxylic acids and derivatives    | 0.21  | 0.07  | 0.47  | 0.07 | 4.67E-03 |
| Pivaloylcarnitine                     | Fatty Acyls                         | -0.12 | -0.27 | 0.03  | 0.03 | 1.14E-01 |
| Norvaline                             | Carboxylic acids and derivatives    | -0.36 | -0.49 | -0.20 | 0.06 | 3.85E-07 |

|                                                                                           |                                  |       |       |       |      |          |
|-------------------------------------------------------------------------------------------|----------------------------------|-------|-------|-------|------|----------|
| SM(d18:1/16:0)                                                                            | Sphingolipids                    | 0.43  | 0.14  | 0.62  | 0.19 | 1.26E-09 |
| (2R)-2-Hydroxy-2-methylbutanenitrile                                                      | Organooxygen compounds           | 0.05  | -0.10 | 0.18  | 0.00 | 5.31E-01 |
| Nandrolone                                                                                | Steroids and steroid derivatives | 0.82  | 0.72  | 0.88  | 2.92 | 4.97E-49 |
| Arachidonic acid                                                                          | Fatty Acyls                      | 0.87  | 0.77  | 0.92  | 1.90 | 3.41E-61 |
| 2-trans-6-cis-Dodecadienal                                                                | Organooxygen compounds           | 0.35  | 0.21  | 0.47  | 0.12 | 1.51E-06 |
| MG(22:2(13Z,16Z)/0:0/0:0)                                                                 | Glycerolipids                    | -0.12 | -0.33 | 0.07  | 0.02 | 1.11E-01 |
| D-4'-Phosphopantothenate                                                                  | Carboxylic acids and derivatives | -0.16 | -0.30 | -0.01 | 0.02 | 3.83E-02 |
| Bilirubin                                                                                 | Organoheterocyclic compounds     | -0.16 | -0.37 | 0.08  | 0.05 | 3.18E-02 |
| Vinylacetylglycine                                                                        | Carboxylic acids and derivatives | 0.26  | 0.08  | 0.41  | 0.03 | 5.88E-04 |
| Alpha-dimorphecolic acid                                                                  | Fatty Acyls                      | 0.83  | 0.72  | 0.89  | 1.79 | 1.71E-51 |
| (alpha-D-mannosyl)7-beta-D-mannosyl-diacetylchitobiosyl-L-asparagine, isoform A (protein) | Carboxylic acids and derivatives | -0.32 | -0.45 | -0.14 | 0.04 | 9.51E-06 |
| Dihydro-6-isopropyl-2,4-dimethyl-4H-1,3,5-dithiazine                                      | Azacyclic compounds              | 0.83  | 0.74  | 0.88  | 1.54 | 1.04E-50 |
| Cohibin A                                                                                 | Fatty Acyls                      | 0.26  | 0.02  | 0.43  | 0.13 | 4.98E-04 |
| L-4-Hydroxyglutamate semialdehyde                                                         | Carboxylic acids and derivatives | 0.00  | -0.16 | 0.16  | 0.00 | 9.51E-01 |
| N2-gamma-Glutamylglutamine                                                                | Carboxylic acids and derivatives | -0.75 | -0.80 | -0.67 | 1.08 | 1.02E-35 |
| 2-Methoxy-3,5-dimethylpyrimidine                                                          | Diazines                         | -0.22 | -0.36 | -0.06 | 0.03 | 3.40E-03 |

|                                                        |                                  |       |       |       |      |          |
|--------------------------------------------------------|----------------------------------|-------|-------|-------|------|----------|
| 3-Hydroxy-4-butanolide                                 | Organooxygen compounds           | 0.17  | 0.03  | 0.31  | 0.01 | 2.44E-02 |
| N-Methylnicotinamide                                   | Pyridines and derivatives        | -0.67 | -0.75 | -0.56 | 0.45 | 8.65E-27 |
| N6-Carbamoyl-L-threonyl-adenosine                      | Purine nucleosides               | 0.11  | -0.07 | 0.28  | 0.01 | 1.69E-01 |
| 6-Chloro-N-(1-methylethyl)-1,3,5-triazine-2,4-diamine  | Triazines                        | 0.22  | 0.06  | 0.37  | 0.09 | 3.01E-03 |
| L-alpha-Aspartyl-L-hydroxyproline                      | NA                               | 0.16  | 0.04  | 0.27  | 0.04 | 3.64E-02 |
| Glutaminylaspartic acid                                | Carboxylic acids and derivatives | 0.10  | -0.05 | 0.26  | 0.01 | 2.11E-01 |
| N-Acetyldopamine                                       | Phenols                          | 0.14  | -0.01 | 0.27  | 0.07 | 7.41E-02 |
| 1,4-Dideoxy-1,4-imino-D-ribitol                        | Pyrrolidines                     | -0.26 | -0.38 | -0.12 | 0.02 | 4.20E-04 |
| Butyrylcarnitine                                       | Fatty Acyls                      | -0.21 | -0.36 | -0.04 | 0.02 | 5.40E-03 |
| Muricatacin                                            |                                  | 0.43  | 0.30  | 0.54  | 0.21 | 1.29E-09 |
| Sonchuionoside C                                       | Prenol lipids                    | -0.69 | -0.80 | -0.57 | 1.02 | 3.81E-28 |
| Lactosylceramide (d18:1/16:0)                          | Sphingolipids                    | 0.16  | -0.04 | 0.35  | 0.04 | 3.50E-02 |
| N-a-Acetyl-L-arginine                                  | Carboxylic acids and derivatives | 0.04  | -0.17 | 0.23  | 0.00 | 6.54E-01 |
| Avocadyne 4-acetate                                    | Fatty Acyls                      | 0.25  | 0.07  | 0.40  | 0.09 | 7.19E-04 |
| 4-(4-Methyl-3-pentenyl)-3-cyclohexene-1-carboxaldehyde | Prenol lipids                    | 0.05  | -0.11 | 0.20  | 0.00 | 5.86E-01 |
| 4-Hydroxymandelonitrile                                | NA                               | -0.21 | -0.39 | -0.01 | 0.04 | 5.93E-03 |
| L-Aspartic acid                                        | Carboxylic acids and derivatives | -0.15 | -0.32 | 0.03  | 0.09 | 4.31E-02 |
| LysoPE(0:0/22:1(13Z))                                  | Glycerophospholipids             | 0.38  | 0.24  | 0.50  | 0.38 | 1.28E-07 |
| Quinceoxepine                                          | Ethers                           | 0.86  | 0.74  | 0.91  | 1.22 | 3.08E-57 |
| 1-(beta-D-Ribofuranosyl)-1,4-dihydronicotinamide       | NA                               | -0.12 | -0.27 | 0.03  | 0.01 | 1.19E-01 |
| LysoPE(0:0/18:0)                                       | Glycerophospholipids             | 0.33  | 0.09  | 0.52  | 0.15 | 6.19E-06 |

|                                         |                                   |       |       |       |      |          |
|-----------------------------------------|-----------------------------------|-------|-------|-------|------|----------|
| N1-Methyl-4-pyridone-3-carboxamide      | Pyridines and derivatives         | 0.02  | -0.16 | 0.19  | 0.00 | 8.23E-01 |
| Imidazole-4-acetaldehyde                | Azoles                            | 0.06  | -0.10 | 0.24  | 0.00 | 4.50E-01 |
| Capsiate                                | Phenols                           | 0.76  | 0.62  | 0.83  | 2.32 | 4.59E-37 |
| 3-Dehydroxycarnitine                    | Fatty Acyls                       | -0.10 | -0.25 | 0.04  | 0.01 | 1.92E-01 |
| LysoPE(22:5(4Z,7Z,10Z,13Z,16Z)/0:0)     | Glycerophospholipids              | -0.14 | -0.35 | 0.09  | 0.03 | 6.39E-02 |
| Corchorifatty acid D                    | Fatty Acyls                       | 0.87  | 0.77  | 0.91  | 2.02 | 5.65E-60 |
| SM(d18:1/24:1(15Z))                     | Sphingolipids                     | 0.26  | -0.01 | 0.46  | 0.08 | 3.71E-04 |
| HDMBOA-Glc                              | Organooxygen compounds            | -0.25 | -0.37 | -0.12 | 0.04 | 7.81E-04 |
| Dieporeticenin                          | Fatty Acyls                       | 0.19  | 0.01  | 0.43  | 0.03 | 1.47E-02 |
| LysoPE(18:2(9Z,12Z)/0:0)                | Glycerophospholipids              | -0.43 | -0.60 | -0.22 | 0.29 | 1.04E-09 |
| Acrylamide                              | Carboximide acids and derivatives | -0.08 | -0.27 | 0.10  | 0.01 | 3.04E-01 |
| N-Acetylneuraminic acid                 | Organooxygen compounds            | -0.21 | -0.36 | -0.04 | 0.02 | 4.74E-03 |
| Hydroxyisocaproic acid                  | Fatty Acyls                       | 0.17  | -0.07 | 0.36  | 0.01 | 2.89E-02 |
| Dihydrouracil                           | Diazines                          | -0.52 | -0.65 | -0.32 | 0.15 | 1.30E-14 |
| PC(16:0/16:0)                           | Glycerophospholipids              | 0.48  | 0.27  | 0.68  | 0.33 | 6.96E-12 |
| Indole                                  | Indoles and derivatives           | 0.79  | 0.68  | 0.86  | 0.59 | 2.54E-43 |
| Formiminoglutamic acid                  | Carboxylic acids and derivatives  | 0.21  | 0.06  | 0.35  | 0.02 | 4.46E-03 |
| PC(20:0/14:0)                           | Glycerophospholipids              | 0.48  | 0.24  | 0.63  | 0.26 | 3.41E-12 |
| PC(18:1(11Z)/14:0)                      | Glycerophospholipids              | 0.30  | -0.01 | 0.53  | 0.08 | 5.15E-05 |
| LysoPE(22:6(4Z,7Z,10Z,13Z,16Z,19Z)/0:0) | Glycerophospholipids              | -0.14 | -0.36 | 0.10  | 0.03 | 7.66E-02 |
| Hypoxanthine                            | Imidazopyrimidines                | 0.24  | 0.10  | 0.34  | 0.21 | 1.59E-03 |
| LysoPE(16:1(9Z)/0:0)                    | Glycerophospholipids              | 0.03  | -0.17 | 0.25  | 0.00 | 7.09E-01 |
| Glucosamine 6-phosphate                 | Organooxygen compounds            | -0.09 | -0.25 | 0.07  | 0.01 | 2.56E-01 |

|                                                                           |                                     |       |       |       |      |          |
|---------------------------------------------------------------------------|-------------------------------------|-------|-------|-------|------|----------|
| 2-Methylpiperidine                                                        | Piperidines                         | -0.13 | -0.23 | 0.01  | 0.02 | 8.50E-02 |
| 2-O-(5,8,11,14,17-Eicosapentaenoyl)-1-O-hexadecylglycero-3-phosphocholine | Glycerophospholipids                | 0.42  | 0.26  | 0.56  | 0.30 | 1.66E-09 |
| PE(16:0/20:4(5Z,8Z,11Z,14Z))                                              | Glycerophospholipids                | -0.56 | -0.70 | -0.37 | 0.43 | 3.66E-17 |
| 10-Nitrolinoleic acid                                                     | Fatty Acyls                         | 0.26  | 0.13  | 0.37  | 0.12 | 5.33E-04 |
| PE(22:5(4Z,7Z,10Z,13Z,16Z)/16:0)                                          | Glycerophospholipids                | -0.55 | -0.72 | -0.34 | 0.36 | 2.40E-16 |
| 4-Hydroxy-L-glutamic acid                                                 | Organic acids and derivatives       | -0.87 | -0.91 | -0.81 | 1.56 | 3.76E-61 |
| Pipericine                                                                | Fatty Acyls                         | -0.01 | -0.14 | 0.12  | 0.00 | 8.68E-01 |
| PE(16:0/18:2(9Z,12Z))                                                     | Glycerophospholipids                | -0.05 | -0.35 | 0.23  | 0.00 | 5.22E-01 |
| Montecristin                                                              | Fatty Acyls                         | -0.04 | -0.34 | 0.24  | 0.00 | 6.18E-01 |
| (4-Hydroxybenzoyl)choline                                                 | Carbonyl compounds                  | 0.03  | -0.12 | 0.15  | 0.00 | 7.62E-01 |
| Deoxyeritadenine                                                          | Imidazopyrimidines                  | 0.20  | 0.02  | 0.34  | 0.02 | 9.43E-03 |
| PC(18:3(6Z,9Z,12Z)/18:0)                                                  | Glycerophospholipids                | -0.42 | -0.63 | -0.17 | 0.16 | 3.25E-09 |
| Nephritogenoside                                                          | Fatty Acyls                         | 0.46  | 0.26  | 0.59  | 0.25 | 3.37E-11 |
| o-Ethyltoluene                                                            | Benzene and substituted derivatives | 0.77  | 0.66  | 0.83  | 0.71 | 9.87E-39 |
| PE(P-18:1(11Z)/18:3(6Z,9Z,12Z))                                           | Glycerophospholipids                | 0.10  | -0.17 | 0.37  | 0.01 | 1.92E-01 |
| beta-Alanine                                                              | Carboxylic acids and derivatives    | -0.21 | -0.35 | -0.03 | 0.02 | 4.28E-03 |
| PC(22:2(13Z,16Z)/P-18:0)                                                  | Glycerophospholipids                | 0.57  | 0.41  | 0.67  | 0.41 | 5.18E-18 |
| DG(18:4(6Z,9Z,12Z,15Z)/16:1(9Z)/0:0)                                      | Glycerolipids                       | 0.29  | 0.11  | 0.45  | 0.09 | 6.31E-05 |
| LysoPC(P-18:1(9Z))                                                        | Glycerophospholipids                | 0.47  | 0.24  | 0.66  | 0.45 | 1.28E-11 |
| MG(0:0/22:4(7Z,10Z,13Z,16Z)/0:0)                                          | Glycerolipids                       | -0.69 | -0.78 | -0.56 | 0.85 | 7.52E-29 |
| SM(d16:1/24:1(15Z))                                                       | Sphingolipids                       | 0.01  | -0.20 | 0.23  | 0.00 | 8.92E-01 |
| 4-Aminobutyraldehyde                                                      | Organooxygen compounds              | -0.29 | -0.43 | -0.12 | 0.04 | 8.15E-05 |

|                                             |                                  |       |       |       |      |          |
|---------------------------------------------|----------------------------------|-------|-------|-------|------|----------|
| 1-(Malonylamino)cyclopropanecarboxylic acid | Carboxylic acids and derivatives | -0.58 | -0.73 | -0.35 | 0.46 | 8.86E-19 |
| Quercetin                                   | Flavonoids                       | -0.31 | -0.49 | -0.09 | 0.22 | 2.09E-05 |
| N-Acetyl-a-neuraminic acid                  | Organooxygen compounds           | -0.14 | -0.28 | 0.02  | 0.01 | 7.89E-02 |
| Ethyl trans-p-methoxycinnamate              | Cinnamic acids and derivatives   | 0.63  | 0.50  | 0.71  | 2.06 | 2.53E-22 |
| 4-Oxo-2-nonenal                             | Organooxygen compounds           | 0.01  | -0.18 | 0.18  | 0.00 | 9.34E-01 |
| 3-Methyl sulfolene                          | Dihydrothiophenes                | -0.15 | -0.32 | 0.07  | 0.02 | 5.88E-02 |
| PC(18:2(9Z,12Z)/18:0)                       | Glycerophospholipids             | 0.26  | -0.06 | 0.50  | 0.05 | 4.48E-04 |
| SM(d17:1/24:0)                              | Sphingolipids                    | -0.05 | -0.22 | 0.12  | 0.00 | 5.04E-01 |
| L-Octanoylcarnitine                         | Fatty Acyls                      | -0.02 | -0.21 | 0.19  | 0.00 | 8.25E-01 |
| gamma-Glutamylglutamic acid                 | Carboxylic acids and derivatives | -0.32 | -0.44 | -0.17 | 0.17 | 1.24E-05 |
| Ipomeatetrahydrofuran                       | Prenol lipids                    | 0.32  | 0.15  | 0.45  | 0.09 | 1.39E-05 |
| LysoPE(20:5(5Z,8Z,11Z,14Z,17Z)/0:0)         | Glycerophospholipids             | -0.50 | -0.63 | -0.32 | 0.40 | 3.73E-13 |
| Prolyl-Glutamine                            | Carboxylic acids and derivatives | 0.06  | -0.12 | 0.25  | 0.00 | 4.50E-01 |
| PC(22:5(7Z,10Z,13Z,16Z,19Z)/15:0)           | Glycerophospholipids             | -0.07 | -0.34 | 0.19  | 0.01 | 3.74E-01 |
| PC(20:2(11Z,14Z)/14:0)                      | Glycerophospholipids             | -0.01 | -0.30 | 0.29  | 0.00 | 8.69E-01 |
| PC(20:1(11Z)/14:0)                          | Glycerophospholipids             | 0.22  | -0.06 | 0.44  | 0.05 | 4.09E-03 |
| (R)-2-Hydroxysterculic acid                 | Fatty Acyls                      | 0.38  | 0.27  | 0.56  | 0.20 | 1.03E-07 |
| Fagomine                                    | Piperidines                      | -0.10 | -0.27 | 0.07  | 0.01 | 1.86E-01 |
| Isoleucyl-Alanine                           | Carboxylic acids and derivatives | -0.22 | -0.38 | -0.04 | 0.03 | 3.98E-03 |
| Glutamyllysine                              | Carboxylic acids and derivatives | -0.08 | -0.24 | 0.08  | 0.02 | 2.92E-01 |

|                                             |                                     |       |       |       |      |          |
|---------------------------------------------|-------------------------------------|-------|-------|-------|------|----------|
| PC(15:0/15:0)                               | Glycerophospholipids                | 0.39  | 0.11  | 0.58  | 0.21 | 2.87E-08 |
| MG(0:0/18:4(6Z,9Z,12Z,15Z)/0:0)             | Glycerolipids                       | 0.71  | 0.59  | 0.79  | 1.05 | 1.32E-30 |
| N2-Maltulosylarginine                       | Saccharolipids                      | -0.18 | -0.34 | -0.03 | 0.12 | 1.57E-02 |
| PC(22:2(13Z,16Z)/16:1(9Z))                  | Glycerophospholipids                | 0.33  | 0.03  | 0.57  | 0.10 | 3.69E-06 |
| SM(d18:1/20:0)                              | Sphingolipids                       | 0.05  | -0.17 | 0.24  | 0.00 | 5.70E-01 |
| Kojibiose                                   | Fatty Acyls                         | 0.12  | -0.07 | 0.29  | 0.02 | 1.14E-01 |
| Cytokinin B                                 | Imidazopyrimidines                  | -0.11 | -0.24 | 0.09  | 0.01 | 1.58E-01 |
| DG(18:4(6Z,9Z,12Z,15Z)/14:1(9Z)/0:0)        | Glycerolipids                       | 0.14  | -0.05 | 0.31  | 0.02 | 7.53E-02 |
| PC(20:2(11Z,14Z)/20:4(5Z,8Z,11Z,14Z))       | Glycerophospholipids                | 0.35  | 0.06  | 0.58  | 0.14 | 1.49E-06 |
| SM(d17:1/24:1(15Z))                         | Sphingolipids                       | 0.21  | -0.08 | 0.44  | 0.04 | 4.46E-03 |
| SM(d18:0/18:1(9Z))                          | Sphingolipids                       | 0.09  | -0.16 | 0.32  | 0.01 | 2.36E-01 |
| 5beta-Cholestane-3alpha,7alpha,24,26-tetrol | NA                                  | -0.56 | -0.68 | -0.38 | 0.43 | 6.42E-17 |
| PC(22:5(4Z,7Z,10Z,13Z,16Z)/16:0)            | Glycerophospholipids                | -0.18 | -0.45 | 0.13  | 0.02 | 1.78E-02 |
| PC(22:5(4Z,7Z,10Z,13Z,16Z)/P-18:0)          | Glycerophospholipids                | 0.22  | -0.01 | 0.42  | 0.09 | 3.96E-03 |
| PC(24:0/14:1(9Z))                           | Glycerophospholipids                | 0.44  | 0.20  | 0.60  | 0.31 | 2.67E-10 |
| LysoPC(16:0)                                | Glycerophospholipids                | 0.69  | 0.57  | 0.77  | 0.73 | 4.02E-28 |
| Sialyllacto-N-tetraose b                    | Organooxygen compounds              | 0.00  | -0.19 | 0.17  | 0.00 | 9.96E-01 |
| SM(d18:1/14:0)                              | Sphingolipids                       | -0.14 | -0.34 | 0.09  | 0.03 | 6.46E-02 |
| PI(22:5(4Z,7Z,10Z,13Z,16Z)/16:0)            | Glycerophospholipids                | -0.23 | -0.44 | 0.00  | 0.04 | 1.76E-03 |
| Lactapiperanol D                            | Prenol lipids                       | 0.72  | 0.60  | 0.79  | 1.09 | 1.16E-31 |
| L-Gulonolactone                             | Lactones                            | 0.16  | 0.00  | 0.30  | 0.01 | 3.42E-02 |
| 2,6-Di-tert-butyl-4-ethylphenol             | Benzene and substituted derivatives | 0.76  | 0.67  | 0.82  | 1.05 | 3.59E-37 |
| PC(18:3(6Z,9Z,12Z)/18:1(11Z))               | Glycerophospholipids                | -0.45 | -0.62 | -0.22 | 0.32 | 1.04E-10 |
| PC(22:4(7Z,10Z,13Z,16Z)/16:0)               | Glycerophospholipids                | -0.11 | -0.35 | 0.13  | 0.02 | 1.73E-01 |
| PC(22:5(4Z,7Z,10Z,13Z,16Z)/15:0)            | Glycerophospholipids                | 0.21  | -0.13 | 0.45  | 0.04 | 6.24E-03 |
| PC(14:0/14:0)                               | Glycerophospholipids                | 0.30  | 0.05  | 0.48  | 0.13 | 5.32E-05 |

|                                                                                     |                                          |       |       |       |      |          |
|-------------------------------------------------------------------------------------|------------------------------------------|-------|-------|-------|------|----------|
| dADP                                                                                | Purine nucleotides                       | -0.01 | -0.18 | 0.14  | 0.00 | 9.40E-01 |
| PC(20:1(11Z)/20:4(5Z,8Z,11Z,14Z))                                                   | Glycerophospholipids                     | 0.33  | 0.01  | 0.57  | 0.11 | 6.61E-06 |
| 3-Benzyl-4-heptanone                                                                | Benzene and substituted derivatives      | 0.44  | 0.28  | 0.56  | 0.23 | 5.31E-10 |
| Betonicine                                                                          | Carboxylic acids and derivatives         | -0.18 | -0.31 | -0.01 | 0.05 | 1.97E-02 |
| Diepomuricanin A                                                                    | NA                                       | 0.10  | -0.11 | 0.36  | 0.01 | 1.94E-01 |
| LysoPE(0:0/14:0)                                                                    | Glycerophospholipids                     | 0.50  | 0.35  | 0.60  | 0.62 | 4.33E-13 |
| SM(d18:0/14:0)                                                                      | Sphingolipids                            | 0.12  | -0.11 | 0.32  | 0.02 | 1.10E-01 |
| PC(20:2(11Z,14Z)/15:0)                                                              | Glycerophospholipids                     | 0.16  | -0.13 | 0.40  | 0.02 | 3.55E-02 |
| PC(22:2(13Z,16Z)/15:0)                                                              | Glycerophospholipids                     | 0.15  | -0.10 | 0.35  | 0.03 | 5.66E-02 |
| 2-(acetylamino)-1,5-anhydro-2-deoxy-3-O-b-D-galactopyranosyl-D-arabino-Hex-1-enitol | Organooxygen compounds                   | 0.42  | 0.26  | 0.53  | 0.22 | 3.26E-09 |
| PC(20:3(5Z,8Z,11Z)/20:0)                                                            | Glycerophospholipids                     | 0.18  | -0.05 | 0.37  | 0.06 | 1.82E-02 |
| LysoPC(18:2(9Z,12Z))                                                                | Glycerophospholipids                     | 0.15  | -0.09 | 0.41  | 0.03 | 4.49E-02 |
| Urothion                                                                            | Pteridines and derivatives               | 0.32  | 0.20  | 0.42  | 0.42 | 1.05E-05 |
| (2'E,4'Z,7'Z,8E)-Colnelenic acid                                                    | Fatty Acyls                              | 0.88  | 0.78  | 0.93  | 2.54 | 3.12E-64 |
| PC(20:0/20:2(11Z,14Z))                                                              | Glycerophospholipids                     | 0.25  | 0.00  | 0.43  | 0.14 | 7.57E-04 |
| Glycerylphosphorylethanolamine                                                      | Organic phosphoric acids and derivatives | -0.16 | -0.29 | -0.02 | 0.04 | 3.99E-02 |
| 6,10,14-Trimethyl-5,9,13-pentadecatrien-2-one                                       | Prenol lipids                            | 0.79  | 0.69  | 0.85  | 0.94 | 3.11E-42 |
| trans-3,4-Dihydro-4,8-dihydroxy-3-methyl-1H-2-benzopyran-1-one                      | Benzopyrans                              | 0.16  | -0.03 | 0.33  | 0.02 | 3.42E-02 |
| Pyridoxamine                                                                        | Pyridines and derivatives                | 0.03  | -0.11 | 0.18  | 0.00 | 7.20E-01 |
| PC(22:4(7Z,10Z,13Z,16Z)/14:0)                                                       | Glycerophospholipids                     | -0.39 | -0.61 | -0.09 | 0.14 | 6.07E-08 |
| PE(20:0/18:4(6Z,9Z,12Z,15Z))                                                        | Glycerophospholipids                     | 0.14  | -0.18 | 0.39  | 0.01 | 7.37E-02 |
| SM(d18:1/18:1(9Z))                                                                  | Sphingolipids                            | 0.34  | 0.08  | 0.55  | 0.12 | 3.55E-06 |

|                                                |                                     |       |       |       |      |          |
|------------------------------------------------|-------------------------------------|-------|-------|-------|------|----------|
| Cohibin C                                      | Fatty Acyls                         | 0.43  | 0.14  | 0.63  | 0.18 | 6.63E-10 |
| 8-Hydroxy-2-octene-4,6-diynoic acid            | Fatty Acyls                         | 0.14  | -0.07 | 0.28  | 0.09 | 7.79E-02 |
| 5-Hydroxy-L-tryptophan                         | Indoles and derivatives             | -0.08 | -0.22 | 0.06  | 0.00 | 2.96E-01 |
| PC(20:4(8Z,11Z,14Z,17Z)/P-18:0)                | Glycerophospholipids                | 0.28  | 0.07  | 0.46  | 0.09 | 1.34E-04 |
| Phenylacetylglutamine                          | Carboxylic acids and derivatives    | 0.17  | -0.01 | 0.33  | 0.02 | 2.70E-02 |
| Isoeugenitol                                   | Benzopyrans                         | -0.10 | -0.25 | 0.06  | 0.01 | 1.85E-01 |
| PC(16:1(9Z)/16:1(9Z))                          | Glycerophospholipids                | -0.22 | -0.45 | 0.03  | 0.06 | 4.09E-03 |
| gamma-L-Glutamyl-gamma-L-glutamyl-L-methionine |                                     | -0.14 | -0.28 | 0.01  | 0.03 | 7.91E-02 |
| 3-Oxoadipic acid                               | Keto acids and derivatives          | 0.42  | 0.26  | 0.52  | 0.07 | 3.83E-09 |
| 6-Deoxohomodolichosterone                      | Steroids and steroid derivatives    | -0.47 | -0.60 | -0.30 | 0.28 | 1.19E-11 |
| PC(18:1(9Z)/P-18:1(11Z))                       | Glycerophospholipids                | 0.33  | 0.08  | 0.54  | 0.10 | 3.69E-06 |
| N-Salicyloylaspartic acid                      | Carboxylic acids and derivatives    | -0.05 | -0.23 | 0.12  | 0.00 | 5.15E-01 |
| Vanilpyruvic acid                              | Benzene and substituted derivatives | 0.10  | -0.06 | 0.23  | 0.01 | 2.05E-01 |
| PC(22:5(7Z,10Z,13Z,16Z,19Z)/16:1(9Z))          | Glycerophospholipids                | -0.10 | -0.36 | 0.21  | 0.01 | 2.24E-01 |
| LysoPC(22:6(4Z,7Z,10Z,13Z,16Z,19Z))            | Glycerophospholipids                | 0.31  | 0.08  | 0.53  | 0.13 | 1.49E-05 |
| Norsanguinarine                                | Quinolines and derivatives          | 0.24  | 0.05  | 0.39  | 0.05 | 1.25E-03 |
| 3-Methyl-5-pentyl-2-furanundecanoic acid       | Fatty Acyls                         | 0.69  | 0.58  | 0.78  | 0.52 | 7.10E-29 |
| 3-Aminopropionaldehyde                         | Organooxygen compounds              | -0.43 | -0.57 | -0.23 | 0.12 | 1.36E-09 |
| PC(22:5(7Z,10Z,13Z,16Z,19Z)/16:0)              | Glycerophospholipids                | -0.30 | -0.54 | -0.02 | 0.14 | 5.54E-05 |
| PC(20:3(8Z,11Z,14Z)/14:0)                      | Glycerophospholipids                | -0.13 | -0.36 | 0.09  | 0.02 | 9.51E-02 |
| Dihydromaleimide                               | NA                                  | -0.71 | -0.80 | -0.55 | 0.46 | 3.33E-31 |

|                                                                                                                                |                                  |       |       |       |      |          |
|--------------------------------------------------------------------------------------------------------------------------------|----------------------------------|-------|-------|-------|------|----------|
| 2,5-Dioxopentanoate                                                                                                            | Keto acids and derivatives       | -0.01 | -0.14 | 0.14  | 0.00 | 9.34E-01 |
| CS-S-Methylcysteine sulfoxide                                                                                                  | NA                               | -0.24 | -0.40 | -0.09 | 0.21 | 1.03E-03 |
| Oxonantenine                                                                                                                   | Aporphines                       | 0.16  | 0.00  | 0.30  | 0.02 | 3.18E-02 |
| DG(14:1(9Z)/18:3(6Z,9Z,12Z)/0:0)                                                                                               | Glycerolipids                    | 0.42  | 0.23  | 0.56  | 0.17 | 3.25E-09 |
| 2-Acetylpyridine                                                                                                               | Carbonyl compounds               | -0.19 | -0.33 | -0.03 | 0.02 | 1.40E-02 |
| 2-Hydroxy-6,7-dimethoxybenzoxazole                                                                                             | Benzoxazoles                     | 0.34  | 0.17  | 0.48  | 0.07 | 2.69E-06 |
| Perillyl acetate                                                                                                               | NA                               | 0.82  | 0.67  | 0.89  | 1.33 | 8.99E-48 |
| N-[(4E,8E)-1,3-dihydroxyoctadeca-4,8-dien-2-yl]hexadecanamide                                                                  | Sphingolipids                    | 0.14  | -0.03 | 0.27  | 0.03 | 7.51E-02 |
| Dihydro-3-(1-octenyl)-2,5-furandione                                                                                           | Oxolanes                         | 0.68  | 0.54  | 0.78  | 0.66 | 6.19E-28 |
| Artonin Q                                                                                                                      | Benzopyrans                      | -0.08 | -0.29 | 0.15  | 0.01 | 3.18E-01 |
| 2-Aminomuconic acid semialdehyde                                                                                               | Carboxylic acids and derivatives | -0.09 | -0.25 | 0.08  | 0.02 | 2.29E-01 |
| DG(20:4(8Z,11Z,14Z,17Z)/14:0/0:0)                                                                                              | Glycerolipids                    | 0.38  | 0.21  | 0.54  | 0.16 | 8.67E-08 |
| Lacto-N-triose I                                                                                                               | Organooxygen compounds           | 0.40  | 0.23  | 0.52  | 0.19 | 2.64E-08 |
| PC(P-18:1(9Z)/14:1(9Z))                                                                                                        | Glycerophospholipids             | 0.01  | -0.17 | 0.17  | 0.00 | 8.91E-01 |
| (2S,4S)-Pinnatanine                                                                                                            | Carboxylic acids and derivatives | 0.04  | -0.17 | 0.24  | 0.00 | 5.97E-01 |
| O-6-deoxy-a-L-galactopyranosyl-(1->2)-O-b-D-galactopyranosyl-(1->3)-2-(acetylamino)-1,5-anhydro-2-deoxy-D-arabino-Hex-1-enitol | Organooxygen compounds           | 0.42  | 0.18  | 0.58  | 0.20 | 1.65E-09 |
| Persicachrome                                                                                                                  | Prenol lipids                    | -0.10 | -0.33 | 0.15  | 0.01 | 2.05E-01 |
| L-trans-5-Hydroxy-2-piperidinecarboxylic acid                                                                                  | Carboxylic acids and derivatives | -0.04 | -0.19 | 0.12  | 0.00 | 6.17E-01 |
| 2-acetyl-1-alkyl-sn-glycero-3-phosphocholine                                                                                   | Glycerophospholipids             | 0.19  | -0.10 | 0.44  | 0.05 | 1.10E-02 |

|                                                  |                                  |       |       |       |      |          |
|--------------------------------------------------|----------------------------------|-------|-------|-------|------|----------|
| PC(16:1(9Z)/15:0)                                | Glycerophospholipids             | 0.40  | 0.11  | 0.61  | 0.15 | 1.12E-08 |
| LysoPC(P-16:0)                                   | Glycerophospholipids             | 0.67  | 0.52  | 0.78  | 0.61 | 2.14E-26 |
| Phenol glucuronide                               | Organooxygen compounds           | 0.63  | 0.48  | 0.72  | 0.50 | 1.88E-22 |
| PC(18:3(6Z,9Z,12Z)/15:0)                         | Glycerophospholipids             | -0.64 | -0.79 | -0.44 | 0.47 | 8.69E-24 |
| PI(20:2(11Z,14Z)/18:2(9Z,12Z))                   | Glycerophospholipids             | 0.44  | 0.20  | 0.60  | 0.23 | 3.39E-10 |
| Glycine                                          | Carboxylic acids and derivatives | -0.40 | -0.53 | -0.24 | 0.11 | 1.12E-08 |
| DG(14:1(9Z)/18:2(9Z,12Z)/0:0)                    | Glycerolipids                    | 0.38  | 0.22  | 0.51  | 0.15 | 1.02E-07 |
| Epomusenin A                                     | Fatty Acyls                      | 0.31  | 0.05  | 0.51  | 0.07 | 2.41E-05 |
| Troloxerutin                                     | Flavonoids                       | 0.19  | 0.04  | 0.35  | 0.06 | 1.27E-02 |
| LysoPE(20:2(11Z,14Z)/0:0)                        | Glycerophospholipids             | 0.25  | 0.06  | 0.43  | 0.12 | 7.80E-04 |
| PE(P-18:1(11Z)/22:4(7Z,10Z,13Z,16Z))             | Glycerophospholipids             | 0.04  | -0.23 | 0.30  | 0.00 | 6.65E-01 |
| PC(22:4(7Z,10Z,13Z,16Z)/15:0)                    | Glycerophospholipids             | 0.26  | -0.03 | 0.48  | 0.07 | 3.71E-04 |
| 1-Methylpyrrole                                  | Pyrroles                         | 0.15  | -0.02 | 0.29  | 0.02 | 5.56E-02 |
| LysoPC(22:5(4Z,7Z,10Z,13Z,16Z))                  | Glycerophospholipids             | 0.31  | 0.10  | 0.49  | 0.24 | 2.36E-05 |
| 5-Hydroxyindoleacetic acid                       | Indoles and derivatives          | 0.32  | 0.19  | 0.44  | 0.09 | 7.65E-06 |
| Seryltyrosine                                    | Carboxylic acids and derivatives | -0.16 | -0.30 | -0.01 | 0.01 | 3.24E-02 |
| 5-Hydroxyisourate                                |                                  | -0.73 | -0.81 | -0.60 | 3.81 | 7.16E-34 |
| Lacto-N-biose I                                  | Organooxygen compounds           | -0.55 | -0.65 | -0.40 | 0.24 | 2.91E-16 |
| PE(P-18:1(11Z)/18:2(9Z,12Z))                     | Glycerophospholipids             | -0.14 | -0.41 | 0.10  | 0.03 | 7.08E-02 |
| 3-(3,4-Dihydroxy-5-methoxy)-2-propenoic acid     | Cinnamic acids and derivatives   | -0.03 | -0.20 | 0.13  | 0.00 | 7.56E-01 |
| 4-Hydroxy-3-(16-methylheptadecyl)-2H-pyran-2-one | Pyrans                           | 0.76  | 0.66  | 0.83  | 0.89 | 1.92E-37 |
| LysoPC(20:3(5Z,8Z,11Z))                          | Glycerophospholipids             | 0.13  | -0.12 | 0.36  | 0.02 | 8.12E-02 |

|                                                           |                                     |       |       |       |      |          |
|-----------------------------------------------------------|-------------------------------------|-------|-------|-------|------|----------|
| PI(20:3(5Z,8Z,11Z)/16:0)                                  | Glycerophospholipids                | -0.44 | -0.60 | -0.24 | 0.35 | 4.97E-10 |
| 1-(3,5-Dihydroxyphenyl)-2-pentadecanone                   | Phenols                             | 0.24  | 0.09  | 0.39  | 0.11 | 1.30E-03 |
| Glucocheirolin                                            | Organooxygen compounds              | -0.22 | -0.41 | -0.02 | 0.07 | 3.08E-03 |
| PE(18:1(9Z)/16:0)                                         | Glycerophospholipids                | 0.23  | 0.02  | 0.42  | 0.07 | 1.99E-03 |
| 5-Hydroxy-7-methoxy-2-tritriacontyl-4H-1-benzopyran-4-one | Benzopyrans                         | -0.56 | -0.73 | -0.37 | 0.53 | 7.30E-17 |
| DG(14:1(9Z)/22:5(4Z,7Z,10Z,13Z,16Z)/0:0)                  | Glycerolipids                       | -0.07 | -0.24 | 0.11  | 0.02 | 3.78E-01 |
| 12,13-EpOME                                               | Fatty Acyls                         | 0.83  | 0.73  | 0.88  | 1.07 | 4.46E-50 |
| PE(20:4(8Z,11Z,14Z,17Z)/P-16:0)                           | Glycerophospholipids                | 0.34  | 0.20  | 0.61  | 0.14 | 3.29E-06 |
| 3,5-Dichloro-4-hydroxy-2-methoxy-6-methylbenzoic acid     | Benzene and substituted derivatives | -0.05 | -0.23 | 0.11  | 0.00 | 5.21E-01 |
| Hydroxyphenylacetyl glycine                               | Carboxylic acids and derivatives    | -0.11 | -0.22 | 0.02  | 0.00 | 1.58E-01 |
| DG(22:4(7Z,10Z,13Z,16Z)/18:3(6Z,9Z,12Z)/0:0)              | Glycerolipids                       | 0.71  | 0.60  | 0.81  | 1.08 | 1.06E-30 |
| PC(22:6(4Z,7Z,10Z,13Z,16Z,19Z)/15:0)                      | Glycerophospholipids                | 0.23  | -0.08 | 0.46  | 0.05 | 2.61E-03 |
| PS(14:0/22:2(13Z,16Z))                                    | Glycerophospholipids                | 0.27  | 0.05  | 0.44  | 0.09 | 2.95E-04 |
| PC(20:4(8Z,11Z,14Z,17Z)/15:0)                             | Glycerophospholipids                | -0.02 | -0.29 | 0.21  | 0.00 | 8.10E-01 |
| Epiafzelechin 3-gallate                                   |                                     | 0.09  | -0.05 | 0.25  | 0.02 | 2.40E-01 |
| PE(18:1(11Z)/18:2(9Z,12Z))                                | Glycerophospholipids                | -0.49 | -0.78 | -0.18 | 0.41 | 1.45E-12 |
| PE(P-18:1(9Z)/16:1(9Z))                                   | Glycerophospholipids                | 0.18  | 0.02  | 0.38  | 0.04 | 1.75E-02 |
| Demethylated antipyrine                                   | Azoles                              | 0.30  | 0.13  | 0.44  | 0.10 | 4.21E-05 |
| PE(P-18:1(11Z)/22:5(4Z,7Z,10Z,13Z,16Z))                   | Glycerophospholipids                | 0.10  | -0.15 | 0.32  | 0.01 | 2.23E-01 |
| 3-Fucosyllactose                                          | Organooxygen compounds              | -0.47 | -0.59 | -0.32 | 0.32 | 2.13E-11 |
| LysoPI(18:0/0:0)                                          | Glycerophospholipids                | -0.12 | -0.26 | 0.03  | 0.01 | 1.12E-01 |
| Isolinderanolide                                          | Tetrahydrofurans                    | -0.44 | -0.61 | -0.21 | 0.28 | 2.67E-10 |

|                                                    |                           |       |       |       |      |          |
|----------------------------------------------------|---------------------------|-------|-------|-------|------|----------|
| PE(P-18:1(9Z)/20:3(5Z,8Z,11Z))                     | Glycerophospholipids      | 0.37  | 0.21  | 0.60  | 0.18 | 2.75E-07 |
| Marmesin rhamnoside                                | Coumarins and derivatives | 0.08  | -0.09 | 0.24  | 0.00 | 3.42E-01 |
| 1-Isothiocyanato-6-(methylthio)hexane              | Isothiocyanates           | -0.39 | -0.52 | -0.24 | 0.12 | 2.87E-08 |
| PE(P-18:1(9Z)/20:5(5Z,8Z,11Z,14Z,17Z))             | Glycerophospholipids      | 0.40  | 0.14  | 0.60  | 0.15 | 1.68E-08 |
| PC(P-16:0/18:4(6Z,9Z,12Z,15Z))                     | Glycerophospholipids      | 0.32  | 0.05  | 0.52  | 0.11 | 1.33E-05 |
| Obtusilactone A                                    | Tetrahydrofurans          | 0.25  | 0.08  | 0.40  | 0.06 | 8.20E-04 |
| PE(P-18:1(9Z)/18:1(9Z))                            | Glycerophospholipids      | 0.24  | 0.05  | 0.44  | 0.06 | 1.26E-03 |
| PE(22:6(4Z,7Z,10Z,13Z,16Z,19Z)/P-18:1(11Z))        | Glycerophospholipids      | 0.17  | -0.09 | 0.42  | 0.02 | 2.84E-02 |
| PE(20:4(5Z,8Z,11Z,14Z)/P-18:1(11Z))                | Glycerophospholipids      | 0.16  | -0.14 | 0.44  | 0.02 | 3.31E-02 |
| Cohibin B                                          | Fatty Acyls               | 0.33  | 0.16  | 0.51  | 0.09 | 6.37E-06 |
| Dide-O-methyl-4-O-alpha-D-glucopyranosylsimmondsin | Organooxygen compounds    | 0.27  | -0.01 | 0.48  | 0.06 | 2.35E-04 |
| PC(P-18:1(9Z)/16:1(9Z))                            | Glycerophospholipids      | 0.42  | 0.34  | 0.49  | 0.62 | 3.16E-09 |
| 1-Isothiocyanato-6-(methylsulfinyl)hexane          | Sulfoxides                | 0.04  | -0.16 | 0.22  | 0.00 | 6.62E-01 |
| PC(20:3(8Z,11Z,14Z)/15:0)                          | Glycerophospholipids      | 0.16  | -0.14 | 0.40  | 0.02 | 3.94E-02 |
| 3-Isopropenylpentanedioic acid                     | Fatty Acyls               | -0.21 | -0.37 | -0.05 | 0.02 | 4.39E-03 |
| PE(P-16:0/20:4(5Z,8Z,11Z,14Z))                     | Glycerophospholipids      | 0.44  | 0.14  | 0.65  | 0.14 | 5.10E-10 |
| Glaucarubin                                        | Prenol lipids             | -0.77 | -0.82 | -0.69 | 1.46 | 5.18E-39 |
| PE(22:2(13Z,16Z)/18:1(11Z))                        | Glycerophospholipids      | 0.22  | -0.06 | 0.44  | 0.05 | 2.87E-03 |
| PE(P-18:0/18:2(9Z,12Z))                            | Glycerophospholipids      | 0.34  | 0.06  | 0.55  | 0.08 | 3.60E-06 |
| Melleolide M                                       | Prenol lipids             | -0.75 | -0.81 | -0.65 | 1.49 | 2.07E-36 |
| PE(P-18:0/22:4(7Z,10Z,13Z,16Z))                    | Glycerophospholipids      | 0.44  | 0.18  | 0.63  | 0.18 | 3.50E-10 |
| Metiamide                                          | Azoles                    | -0.30 | -0.44 | -0.11 | 0.09 | 3.71E-05 |
| PS(18:0/22:6(4Z,7Z,10Z,13Z,16Z,19Z))               | Glycerophospholipids      | 0.46  | 0.25  | 0.60  | 0.38 | 3.12E-11 |

**Table S4.** Details of PC2 results

| Metabolites                                    | Class                            | PCA      | Bootstrap CI of |       | Contribution (%) | FDR      |
|------------------------------------------------|----------------------------------|----------|-----------------|-------|------------------|----------|
|                                                |                                  | loadings | Lower           | Upper |                  |          |
| 3,3,5-triiodo-L-thyronine-beta-D-glucuronoside | Carboxylic acids and derivatives | 0.03     | -0.15           | 0.23  | 0.00             | 7.18E-01 |
| Cellobiose                                     | Organooxygen compounds           | -0.07    | -0.21           | 0.10  | 0.01             | 4.14E-01 |
| Adenine                                        | Imidazopyrimidines               | -0.31    | -0.49           | -0.07 | 0.20             | 3.27E-05 |
| 1-Amino-propan-2-ol                            | Organonitrogen compounds         | 0.05     | -0.24           | 0.28  | 0.00             | 5.22E-01 |
| 1-Pyrroline                                    | Pyrrolines                       | -0.35    | -0.52           | -0.15 | 0.16             | 8.60E-07 |
| Rheidin A                                      | Anthracenes                      | -0.12    | -0.36           | 0.13  | 0.02             | 1.30E-01 |
| 1-Kestose                                      | Organooxygen compounds           | 0.25     | 0.03            | 0.41  | 0.06             | 9.46E-04 |
| Niacinamide                                    | Pyridines and derivatives        | -0.12    | -0.29           | 0.09  | 0.03             | 1.40E-01 |
| 5-Methylcytidine                               | Pyrimidine nucleosides           | -0.39    | -0.67           | -0.10 | 0.15             | 4.25E-08 |
| Yuccaol C                                      | 2-arylbenzofuran flavonoids      | 0.27     | 0.05            | 0.42  | 0.08             | 3.67E-04 |
| Adenosine                                      | Purine nucleosides               | 0.07     | -0.16           | 0.27  | 0.01             | 4.19E-01 |
| 1-Methylinosine                                | Purine nucleosides               | -0.32    | -0.49           | -0.03 | 0.13             | 1.17E-05 |
| Choline                                        | Organonitrogen compounds         | -0.17    | -0.38           | 0.08  | 0.02             | 3.36E-02 |
| D-Proline                                      | Carboxylic acids and derivatives | 0.14     | -0.02           | 0.29  | 0.01             | 7.95E-02 |
| 1H-Pyrrole-2-carboxaldehyde                    | Organooxygen compounds           | 0.10     | -0.11           | 0.25  | 0.01             | 2.24E-01 |

|                                                     |                                           |       |       |       |      |          |
|-----------------------------------------------------|-------------------------------------------|-------|-------|-------|------|----------|
| 4-Aminophenol                                       | Benzene and substituted derivatives       | -0.18 | -0.33 | 0.00  | 0.03 | 1.68E-02 |
| Pyrrolidonecarboxylic acid                          | Carboxylic acids and derivatives          | -0.27 | -0.58 | -0.01 | 0.08 | 3.65E-04 |
| Uracil                                              | Diazines                                  | -0.53 | -0.67 | -0.22 | 0.41 | 2.98E-15 |
| 5-Aminopentanoic acid                               | Carboxylic acids and derivatives          | 0.12  | -0.16 | 0.33  | 0.02 | 1.33E-01 |
| 5,12-dihydroxy-6,8,10,14,17-eicosapentaenoic acid   | NA                                        | -0.38 | -0.56 | -0.13 | 1.01 | 1.16E-07 |
| Kynurenic acid                                      | Quinolines and derivatives                | -0.06 | -0.21 | 0.15  | 0.01 | 4.62E-01 |
| Cytidine monophosphate                              | Pyrimidine nucleotides                    | 0.04  | -0.36 | 0.27  | 0.00 | 6.57E-01 |
| N2,N2-Dimethylguanosine                             | Purine nucleosides                        | -0.19 | -0.38 | 0.13  | 0.04 | 1.31E-02 |
| Gonyautoxin VI                                      | Saxitoxins, gonyautoxins, and derivatives | -0.22 | -0.47 | 0.00  | 0.07 | 4.67E-03 |
| 4-(3,4-Dihydroxyphenyl)-2-hydroxy-1H-phenalen-1-one | Naphthalenes                              | -0.07 | -0.21 | 0.06  | 0.00 | 4.17E-01 |
| Guanine                                             | Imidazopyrimidines                        | -0.14 | -0.38 | 0.15  | 0.04 | 7.20E-02 |
| Nicotinamide ribotide                               | NA                                        | 0.18  | -0.13 | 0.42  | 0.10 | 2.11E-02 |
| Prolyl-Aspartate                                    | Carboxylic acids and derivatives          | 0.27  | -0.02 | 0.47  | 0.08 | 3.03E-04 |
| 1-Methylnicotinamide                                | Pyridines and derivatives                 | 0.21  | 0.02  | 0.39  | 0.04 | 5.15E-03 |
| Pipecolic acid                                      | Carboxylic acids and derivatives          | -0.25 | -0.41 | 0.02  | 0.08 | 1.06E-03 |

|                                            |                                        |       |       |       |      |          |
|--------------------------------------------|----------------------------------------|-------|-------|-------|------|----------|
| N-Ornithyl-L-taurine                       | Carboxylic acids and derivatives       | 0.16  | 0.01  | 0.39  | 0.05 | 3.81E-02 |
| D-Maltose                                  | Organooxygen compounds                 | -0.38 | -0.57 | -0.07 | 0.16 | 1.09E-07 |
| 2-O-(6-Phospho-alpha-mannosyl)-D-glycerate | Organooxygen compounds                 | -0.09 | -0.23 | 0.09  | 0.01 | 2.88E-01 |
| Taurine                                    | Organic sulfonic acids and derivatives | 0.00  | -0.22 | 0.20  | 0.00 | 9.88E-01 |
| 2-O-Galloylsucrose                         | Benzene and substituted derivatives    | -0.14 | -0.37 | 0.14  | 0.06 | 6.78E-02 |
| L-Asparagine                               | Carboxylic acids and derivatives       | -0.10 | -0.29 | 0.10  | 0.02 | 2.36E-01 |
| Pyrrolidine                                | Pyrrolidines                           | 0.03  | -0.14 | 0.19  | 0.00 | 7.08E-01 |
| Protoanemonin                              | Dihydrofurans                          | 0.06  | -0.17 | 0.41  | 0.01 | 4.43E-01 |
| Xanthotoxol glucoside                      | Coumarins and derivatives              | 0.02  | -0.19 | 0.33  | 0.00 | 7.96E-01 |
| L-Threonine                                | Carboxylic acids and derivatives       | -0.37 | -0.54 | -0.12 | 0.18 | 2.52E-07 |
| 1-Methyladenosine                          | Purine nucleosides                     | -0.26 | -0.45 | 0.04  | 0.09 | 4.04E-04 |
| Propionylcarnitine                         | Fatty Acyls                            | 0.36  | 0.12  | 0.61  | 0.16 | 6.44E-07 |
| Phenylacetaldehyde                         | Benzene and substituted derivatives    | 0.04  | -0.26 | 0.41  | 0.00 | 6.24E-01 |
| N4-Acetylcytidine                          | Pyrimidine nucleosides                 | -0.13 | -0.52 | 0.28  | 0.05 | 1.16E-01 |
| 2,5-Dihydro-2,4-dimethyloxazole            | Azolines                               | 0.10  | -0.08 | 0.25  | 0.03 | 2.47E-01 |
| 3-Methylhistidine                          | Carboxylic acids and derivatives       | -0.16 | -0.36 | 0.04  | 0.08 | 4.63E-02 |

|                                           |                                     |       |       |       |      |          |
|-------------------------------------------|-------------------------------------|-------|-------|-------|------|----------|
| Sphinganine                               | Organonitrogen compounds            | 0.07  | -0.11 | 0.21  | 0.03 | 4.19E-01 |
| Chondroitin                               | Organooxygen compounds              | -0.29 | -0.47 | -0.08 | 0.08 | 7.96E-05 |
| 2-Methylfuran                             | Heteroaromatic compounds            | -0.06 | -0.28 | 0.18  | 0.04 | 4.39E-01 |
| trans-3,3',4',5,5',7-Hexahydroxyflavanone | NA                                  | -0.02 | -0.19 | 0.18  | 0.00 | 8.01E-01 |
| Acetylhydrazine                           | Carboxylic acids and derivatives    | -0.40 | -0.60 | -0.13 | 0.15 | 1.81E-08 |
| Turanose                                  | Fatty Acyls                         | -0.22 | -0.43 | -0.03 | 0.05 | 3.00E-03 |
| L-Palmitoylcarnitine                      | Fatty Acyls                         | 0.45  | 0.26  | 0.58  | 0.83 | 1.58E-10 |
| Lacto-N-fucopentaose III                  | Organooxygen compounds              | 0.00  | -0.31 | 0.22  | 0.00 | 9.90E-01 |
| 3-Acetamidobutanal                        | Organooxygen compounds              | -0.08 | -0.24 | 0.08  | 0.01 | 3.13E-01 |
| 4-Aminohippuric acid                      | Benzene and substituted derivatives | 0.30  | 0.04  | 0.48  | 0.11 | 4.07E-05 |
| L-Phenylalanine                           | Carboxylic acids and derivatives    | 0.05  | -0.13 | 0.23  | 0.00 | 5.95E-01 |
| Methyl 2-furoate                          | Furans                              | -0.02 | -0.27 | 0.36  | 0.00 | 8.54E-01 |
| N-Hexadecanoylpyrrolidine                 | Pyrrolidines                        | 0.55  | 0.32  | 0.70  | 0.70 | 1.32E-16 |
| 1-Methylhypoxanthine                      | NA                                  | -0.35 | -0.51 | -0.08 | 0.16 | 1.10E-06 |
| erythro-Isoleucine                        | NA                                  | 0.06  | -0.13 | 0.25  | 0.00 | 4.66E-01 |
| L-Acetylcarnitine                         | Fatty Acyls                         | 0.17  | -0.06 | 0.55  | 0.02 | 2.43E-02 |
| Trigonelline                              |                                     | -0.10 | -0.30 | 0.11  | 0.03 | 2.24E-01 |
| D-Serine                                  | Carboxylic acids and derivatives    | -0.28 | -0.49 | 0.03  | 0.11 | 1.71E-04 |
| 1-Methylguanosine                         | Purine nucleosides                  | -0.03 | -0.22 | 0.23  | 0.00 | 7.49E-01 |

|                        |                                     |       |       |       |      |          |
|------------------------|-------------------------------------|-------|-------|-------|------|----------|
| Uridine                | Pyrimidine nucleosides              | -0.53 | -0.67 | -0.21 | 0.41 | 2.64E-15 |
| 2,5-Dimethyloxazole    | Azoles                              | -0.08 | -0.30 | 0.20  | 0.01 | 3.66E-01 |
| Adenosine 2'-phosphate | Organooxygen compounds              | 0.42  | -0.05 | 0.58  | 0.68 | 3.98E-09 |
| Cytidine               | Pyrimidine nucleosides              | -0.37 | -0.53 | -0.11 | 0.27 | 1.79E-07 |
| 5'-Methylthioadenosine | 5'-deoxyribonucleosides             | 0.02  | -0.23 | 0.28  | 0.00 | 8.14E-01 |
| L-Lysine               | Carboxylic acids and derivatives    | -0.21 | -0.37 | 0.03  | 0.08 | 4.96E-03 |
| Piperidine             | Piperidines                         | -0.04 | -0.19 | 0.13  | 0.00 | 5.99E-01 |
| 3-Methylguanine        | Imidazopyrimidines                  | -0.54 | -0.70 | -0.27 | 0.52 | 7.39E-16 |
| Thiamine monophosphate | Diazines                            | -0.02 | -0.43 | 0.23  | 0.00 | 8.00E-01 |
| Sorbose 1-phosphate    | Organooxygen compounds              | -0.30 | -0.42 | -0.15 | 0.07 | 4.09E-05 |
| Trimethylamine N-oxide | Organonitrogen compounds            | 0.08  | -0.10 | 0.24  | 0.01 | 3.72E-01 |
| D-Glutamine            | Carboxylic acids and derivatives    | -0.21 | -0.52 | 0.04  | 0.10 | 6.31E-03 |
| 2-Butenal              | NA                                  | -0.07 | -0.29 | 0.22  | 0.01 | 4.06E-01 |
| Styrene                | Benzene and substituted derivatives | -0.15 | -0.33 | 0.10  | 0.03 | 5.55E-02 |
| Anserine               | Peptidomimetics                     | -0.06 | -0.23 | 0.10  | 0.01 | 4.39E-01 |
| Oleamide               | Fatty Acyls                         | 0.56  | 0.37  | 0.66  | 0.44 | 4.97E-17 |
| Solasodine             | Steroids and steroid derivatives    | 0.17  | -0.03 | 0.33  | 0.21 | 2.66E-02 |

|                            |                                     |       |       |       |      |          |
|----------------------------|-------------------------------------|-------|-------|-------|------|----------|
| Dihydroneopterin phosphate | Pteridines and derivatives          | -0.59 | -0.72 | -0.26 | 0.49 | 3.76E-19 |
| Diethanolamine             | Organonitrogen compounds            | -0.13 | -0.35 | 0.04  | 0.02 | 9.21E-02 |
| 2-Fucosyllactose           | Organooxygen compounds              | -0.08 | -0.32 | 0.26  | 0.02 | 3.64E-01 |
| Nicotine                   | Pyridines and derivatives           | -0.03 | -0.16 | 0.11  | 0.00 | 6.88E-01 |
| Spinacetin 3-gentiobioside | Flavonoids                          | -0.10 | -0.30 | 0.20  | 0.06 | 2.44E-01 |
| Citrulline                 | Carboxylic acids and derivatives    | -0.32 | -0.52 | -0.03 | 0.13 | 1.68E-05 |
| 4-Hydroxybenzaldehyde      | Organooxygen compounds              | -0.02 | -0.14 | 0.12  | 0.00 | 8.53E-01 |
| Prolyl-Arginine            | Carboxylic acids and derivatives    | -0.18 | -0.35 | 0.06  | 0.18 | 1.71E-02 |
| Pantothenic acid           | Alcohols and polyols                | -0.02 | -0.16 | 0.16  | 0.00 | 8.35E-01 |
| L-Valine                   | Carboxylic acids and derivatives    | -0.33 | -0.55 | -0.08 | 0.10 | 6.86E-06 |
| 3-Amino-2-piperidone       | Carboxylic acids and derivatives    | -0.11 | -0.27 | 0.10  | 0.01 | 1.64E-01 |
| Uralenneoside              | Benzene and substituted derivatives | -0.08 | -0.25 | 0.15  | 0.01 | 3.72E-01 |
| Lactaldehyde               | Organooxygen compounds              | -0.01 | -0.25 | 0.22  | 0.00 | 9.11E-01 |
| Mesalazine                 | Benzene and substituted derivatives | -0.09 | -0.23 | 0.06  | 0.01 | 2.67E-01 |
| Muscomin                   | Homoisoflavonoids                   | -0.13 | -0.36 | 0.09  | 0.02 | 1.18E-01 |

|                                                                   |                                  |       |       |       |      |          |
|-------------------------------------------------------------------|----------------------------------|-------|-------|-------|------|----------|
| Urocanic acid                                                     | Azoles                           | 0.12  | -0.03 | 0.29  | 0.05 | 1.45E-01 |
| Dimethyl dialkyl ammonium chloride                                | Quaternary ammonium salts        | 0.00  | -0.20 | 0.22  | 0.00 | 9.88E-01 |
| NAD                                                               | (5'→5')-dinucleotides            | 0.43  | 0.12  | 0.60  | 0.47 | 1.16E-09 |
| Sialyl-Lewis X                                                    | Organooxygen compounds           | -0.24 | -0.51 | 0.06  | 0.13 | 1.42E-03 |
| N-Acetylhistidine                                                 | Carboxylic acids and derivatives | 0.20  | -0.04 | 0.35  | 0.05 | 9.36E-03 |
| 3alpha,4,5,7alpha-Tetrahydro-5-hydroxy-1H-isoindole-1,3(2H)-dione | Isoindoles and derivatives       | -0.20 | -0.49 | 0.08  | 0.07 | 8.12E-03 |
| 2-Acetyl-3,6-dimethylpyrazine                                     | Carbonyl compounds               | 0.06  | -0.10 | 0.19  | 0.00 | 4.93E-01 |
| Homo-L-arginine                                                   | Carboxylic acids and derivatives | -0.23 | -0.42 | 0.05  | 0.10 | 2.00E-03 |
| 3,4',5,6-Tetrahydroxy-3',7-dimethoxyflavone 3-glucuronide         | Flavonoids                       | -0.15 | -0.40 | 0.13  | 0.06 | 5.75E-02 |
| L-Arginine                                                        | Carboxylic acids and derivatives | -0.19 | -0.39 | 0.09  | 0.05 | 1.55E-02 |
| Ornithine                                                         | Carboxylic acids and derivatives | -0.06 | -0.23 | 0.11  | 0.01 | 4.41E-01 |
| Biliverdin                                                        | Tetrapyrroles and derivatives    | 0.13  | -0.13 | 0.36  | 0.08 | 9.21E-02 |
| 4,8 Dimethylnonanoyl carnitine                                    | Fatty Acyls                      | -0.29 | -0.47 | -0.04 | 0.36 | 1.10E-04 |
| S-Adenosylmethionine                                              | 5'-deoxyribonucleosides          | -0.10 | -0.49 | 0.28  | 0.02 | 2.03E-01 |
| 1,2,3,4-Tetrahydro-b-carboline-1,3-dicarboxylic acid              | Harmala alkaloids                | -0.06 | -0.21 | 0.11  | 0.00 | 4.90E-01 |
| Spinatoside                                                       | Flavonoids                       | -0.14 | -0.37 | 0.16  | 0.05 | 9.01E-02 |
| 5-Methyl-2-furancarboxaldehyde                                    | Carbonyl compounds               | -0.06 | -0.27 | 0.20  | 0.04 | 4.62E-01 |
| Tryptophan                                                        | NA                               | 0.04  | -0.13 | 0.21  | 0.00 | 6.78E-01 |

|                                                           |                                  |       |       |       |      |          |
|-----------------------------------------------------------|----------------------------------|-------|-------|-------|------|----------|
| O-Acetylserine                                            | Carboxylic acids and derivatives | -0.34 | -0.63 | -0.08 | 0.08 | 4.00E-06 |
| (9S,10E,12Z,15Z)-9-Hydroxy-10,12,15-octadecatrienoic acid | Lineolic acids and derivatives   | -0.30 | -0.49 | -0.05 | 0.33 | 3.85E-05 |
| FAPy-adenine                                              | Diazines                         | -0.20 | -0.43 | -0.06 | 0.09 | 8.55E-03 |
| 5-HEPE                                                    | Fatty Acyls                      | -0.04 | -0.22 | 0.14  | 0.01 | 6.41E-01 |
| 7-Aminoclonazepam                                         | Benzodiazepines                  | -0.37 | -0.53 | -0.12 | 0.51 | 2.07E-07 |
| Linoleamide                                               | Fatty Acyls                      | 0.36  | 0.19  | 0.52  | 0.23 | 4.08E-07 |
| Gerberinol                                                | Coumarins and derivatives        | -0.09 | -0.35 | 0.12  | 0.01 | 2.94E-01 |
| Saccharopine                                              | Carboxylic acids and derivatives | -0.10 | -0.28 | 0.12  | 0.03 | 2.45E-01 |
| Pyroglutamic acid                                         | Carboxylic acids and derivatives | -0.20 | -0.47 | 0.06  | 0.33 | 8.49E-03 |
| LysoPE(18:1(9Z)/0:0)                                      | Glycerophospholipids             | 0.40  | 0.11  | 0.59  | 0.36 | 2.74E-08 |
| Octadecanamide                                            | Fatty Acyls                      | 0.46  | 0.26  | 0.58  | 0.33 | 3.68E-11 |
| DG(22:5(7Z,10Z,13Z,16Z,19Z)/16:1(9Z)/0:0)                 | Glycerolipids                    | -0.22 | -0.42 | 0.02  | 0.13 | 3.52E-03 |
| Trimethylaminoacetone                                     | Organooxygen compounds           | 0.17  | 0.00  | 0.31  | 0.03 | 2.73E-02 |
| Cholesterol                                               | Steroids and steroid derivatives | -0.14 | -0.31 | 0.14  | 0.06 | 8.83E-02 |
| 1-Salicylate glucuronide                                  | Organooxygen compounds           | -0.46 | -0.56 | -0.29 | 0.26 | 4.69E-11 |
| Racemethionine                                            | NA                               | -0.07 | -0.21 | 0.15  | 0.01 | 4.06E-01 |
| Allysine                                                  | Carboxylic acids and derivatives | 0.09  | -0.12 | 0.25  | 0.02 | 2.96E-01 |
| Pyro-L-glutaminy-L-glutamine                              | Carboxylic acids and derivatives | -0.27 | -0.60 | 0.07  | 0.10 | 3.08E-04 |

|                                    |                                               |       |       |       |      |          |
|------------------------------------|-----------------------------------------------|-------|-------|-------|------|----------|
| UDP-N-acetyl-alpha-D-galactosamine | Pyrimidine nucleotides                        | -0.09 | -0.44 | 0.14  | 0.03 | 2.79E-01 |
| 4-Amino-2-methylenebutanoic acid   | Carboxylic acids and derivatives              | -0.02 | -0.19 | 0.14  | 0.00 | 8.14E-01 |
| 2-Furanmethanol                    | Heteroaromatic compounds                      | -0.06 | -0.27 | 0.21  | 0.01 | 4.99E-01 |
| Ecgonine                           | Tropane alkaloids                             | 0.24  | 0.05  | 0.47  | 0.08 | 1.78E-03 |
| 5,6-Dihydroxyindole                | Indoles and derivatives                       | 0.06  | -0.09 | 0.21  | 0.00 | 4.50E-01 |
| Valyl-Lysine                       | Carboxylic acids and derivatives              | -0.29 | -0.44 | -0.03 | 0.08 | 1.16E-04 |
| AICA-riboside                      | Imidazole ribonucleosides and ribonucleotides | -0.22 | -0.44 | -0.03 | 0.13 | 3.21E-03 |
| Beta-D-Glucopyranuronic acid       | Organooxygen compounds                        | -0.69 | -0.80 | -0.36 | 0.76 | 2.89E-28 |
| 3-Oxohexadecanoyl-CoA              | Fatty Acyls                                   | -0.05 | -0.24 | 0.18  | 0.01 | 5.60E-01 |
| Homoarecoline                      |                                               | 0.11  | -0.07 | 0.26  | 0.02 | 1.94E-01 |
| Lacto-N-difucopentaose II          | Organooxygen compounds                        | 0.05  | -0.14 | 0.23  | 0.01 | 5.52E-01 |
| LysoPE(0:0/22:4(7Z,10Z,13Z,16Z))   | Glycerophospholipids                          | 0.39  | 0.01  | 0.59  | 0.38 | 4.25E-08 |
| alpha-Zearalenol                   | Macrolides and analogues                      | -0.49 | -0.68 | -0.19 | 0.31 | 1.26E-12 |
| L-Tyrosine                         | Carboxylic acids and derivatives              | 0.03  | -0.13 | 0.17  | 0.00 | 7.77E-01 |
| LysoPE(20:1(11Z)/0:0)              | Glycerophospholipids                          | 0.12  | -0.28 | 0.39  | 0.03 | 1.56E-01 |
| Thiamine                           | Diazines                                      | -0.23 | -0.42 | 0.02  | 0.13 | 2.44E-03 |
| LysoPE(16:0/0:0)                   | Glycerophospholipids                          | 0.17  | -0.09 | 0.36  | 0.07 | 2.90E-02 |
| Guanosine                          | Purine nucleosides                            | -0.10 | -0.28 | 0.09  | 0.02 | 2.15E-01 |

|                                       |                                                 |       |       |       |      |          |
|---------------------------------------|-------------------------------------------------|-------|-------|-------|------|----------|
| LysoPE(0:0/18:3(6Z,9Z,12Z))           | Glycerophospholipids                            | 0.27  | -0.06 | 0.50  | 0.22 | 2.32E-04 |
| beta-Lactose                          | Carbohydrates and<br>carbohydrate<br>conjugates | 0.31  | 0.00  | 0.51  | 0.38 | 1.90E-05 |
| 3,4,5-Trimethoxycinnamic acid         | Cinnamic acids and<br>derivatives               | -0.02 | -0.28 | 0.40  | 0.00 | 8.20E-01 |
| Delta-12-Prostaglandin J2             | Fatty Acyls                                     | -0.37 | -0.55 | -0.13 | 1.27 | 3.57E-07 |
| N-Acetyl-L-alanine                    | Carboxylic acids and<br>derivatives             | -0.08 | -0.26 | 0.11  | 0.01 | 3.64E-01 |
| 3-Hydroxyisovalerylcarnitine          | Fatty Acyls                                     | 0.30  | 0.09  | 0.55  | 0.19 | 4.04E-05 |
| Nicotinic acid                        | Pyridines and<br>derivatives                    | -0.05 | -0.29 | 0.16  | 0.00 | 5.08E-01 |
| 4-Acetyl-3-methylpyridine             | Carbonyl compounds                              | 0.02  | -0.14 | 0.18  | 0.00 | 8.53E-01 |
| Phosphocreatine                       | Carboxylic acids and<br>derivatives             | 0.17  | -0.16 | 0.39  | 0.26 | 3.24E-02 |
| Palmitoylethanolamide                 | Carboximidic acids<br>and derivatives           | 0.51  | 0.31  | 0.63  | 0.41 | 1.18E-13 |
| 3'-Sialyllactose                      | Organooxygen<br>compounds                       | 0.12  | -0.14 | 0.41  | 0.01 | 1.39E-01 |
| 2-Aminoacrylic acid                   | Carboxylic acids and<br>derivatives             | -0.17 | -0.49 | 0.17  | 0.13 | 2.75E-02 |
| 2,4-Dimethyloxazole                   | Azoles                                          | 0.00  | -0.18 | 0.14  | 0.00 | 9.88E-01 |
| LysoPE(0:0/20:4(5Z,8Z,11Z,14Z))       | Glycerophospholipids                            | 0.28  | -0.03 | 0.53  | 0.18 | 2.05E-04 |
| 2-Azetidinecarboxylic acid            | NA                                              | -0.30 | -0.50 | -0.11 | 0.06 | 5.43E-05 |
| Epsilon-caprolactam                   | Lactams                                         | -0.13 | -0.31 | 0.09  | 0.03 | 1.00E-01 |
| Polyoxyethylene (600) monoricinoleate | Fatty Acyls                                     | 0.56  | 0.35  | 0.69  | 0.66 | 3.60E-17 |
| 1,3-Diisopropylbenzene                | Benzene and<br>substituted<br>derivatives       | -0.12 | -0.31 | 0.13  | 0.02 | 1.34E-01 |

|                                      |                                     |       |       |       |      |          |
|--------------------------------------|-------------------------------------|-------|-------|-------|------|----------|
| Triethanolamine                      | Amines                              | 0.02  | -0.15 | 0.17  | 0.00 | 8.15E-01 |
| Aminofructose 6-phosphate            | Organooxygen compounds              | -0.29 | -0.44 | -0.07 | 0.11 | 7.39E-05 |
| 1-Methyl-1,3-cyclohexadiene          | Olefins                             | -0.32 | -0.51 | -0.02 | 0.13 | 1.39E-05 |
| Epidermin                            | Organooxygen compounds              | 0.36  | 0.12  | 0.52  | 0.27 | 7.00E-07 |
| Proline betaine                      | Carboxylic acids and derivatives    | 0.14  | -0.03 | 0.32  | 0.08 | 8.62E-02 |
| O-Phosphotyrosine                    | Carboxylic acids and derivatives    | -0.08 | -0.36 | 0.11  | 0.01 | 3.35E-01 |
| N-Acetylputrescine                   | Carboximidic acids and derivatives  | -0.06 | -0.29 | 0.18  | 0.01 | 4.82E-01 |
| Dehydrophytosphingosine              | Organonitrogen compounds            | 0.28  | 0.12  | 0.42  | 0.21 | 1.43E-04 |
| 13S-hydroxyoctadecadienoic acid      | Fatty Acyls                         | -0.20 | -0.40 | 0.05  | 0.12 | 7.86E-03 |
| o-Xylene                             | Benzene and substituted derivatives | -0.22 | -0.40 | 0.05  | 0.07 | 4.07E-03 |
| Asparaginy-Hydroxyproline            | Carboxylic acids and derivatives    | -0.14 | -0.53 | 0.14  | 0.05 | 8.21E-02 |
| Pivaloylcarnitine                    | Fatty Acyls                         | 0.26  | 0.08  | 0.51  | 0.23 | 4.93E-04 |
| Norvaline                            | Carboxylic acids and derivatives    | 0.08  | -0.09 | 0.24  | 0.00 | 3.59E-01 |
| SM(d18:1/16:0)                       | Sphingolipids                       | 0.71  | 0.43  | 0.81  | 0.87 | 3.23E-30 |
| (2R)-2-Hydroxy-2-methylbutanenitrile | Organooxygen compounds              | 0.07  | -0.11 | 0.25  | 0.01 | 4.10E-01 |
| Nandrolone                           | Steroids and steroid derivatives    | -0.27 | -0.47 | 0.00  | 0.53 | 2.33E-04 |
| Arachidonic acid                     | Fatty Acyls                         | -0.31 | -0.50 | -0.05 | 0.40 | 1.90E-05 |

|                                                                                           |                                  |       |       |       |      |          |
|-------------------------------------------------------------------------------------------|----------------------------------|-------|-------|-------|------|----------|
| 2-trans-6-cis-Dodecadienal                                                                | Organooxygen compounds           | -0.08 | -0.28 | 0.17  | 0.01 | 3.22E-01 |
| MG(22:2(13Z,16Z)/0:0/0:0)                                                                 | Glycerolipids                    | 0.43  | 0.24  | 0.56  | 0.43 | 7.87E-10 |
| D-4'-Phosphopantothenate                                                                  | Carboxylic acids and derivatives | -0.04 | -0.20 | 0.13  | 0.00 | 6.30E-01 |
| Bilirubin                                                                                 | Organoheterocyclic compounds     | 0.35  | 0.09  | 0.48  | 0.41 | 9.42E-07 |
| Vinylacetylglycine                                                                        | Carboxylic acids and derivatives | 0.07  | -0.12 | 0.23  | 0.00 | 3.86E-01 |
| Alpha-dimorphecolic acid                                                                  | Fatty Acyls                      | -0.29 | -0.51 | 0.00  | 0.35 | 9.48E-05 |
| (alpha-D-mannosyl)7-beta-D-mannosyl-diacetylchitobiosyl-L-asparagine, isoform A (protein) | Carboxylic acids and derivatives | -0.21 | -0.49 | 0.03  | 0.03 | 5.15E-03 |
| Dihydro-6-isopropyl-2,4-dimethyl-4H-1,3,5-dithiazine                                      | Azacyclic compounds              | -0.20 | -0.38 | 0.03  | 0.14 | 9.59E-03 |
| Cohibin A                                                                                 | Fatty Acyls                      | 0.63  | 0.33  | 0.74  | 1.22 | 3.34E-22 |
| L-4-Hydroxyglutamate semialdehyde                                                         | Carboxylic acids and derivatives | -0.03 | -0.23 | 0.15  | 0.00 | 7.77E-01 |
| N2-gamma-Glutamylglutamine                                                                | Carboxylic acids and derivatives | -0.07 | -0.29 | 0.12  | 0.01 | 4.36E-01 |
| 2-Methoxy-3,5-dimethylpyrimidine                                                          | Diazines                         | -0.20 | -0.35 | -0.04 | 0.03 | 1.06E-02 |
| 3-Hydroxy-4-butanolide                                                                    | Organooxygen compounds           | -0.07 | -0.27 | 0.14  | 0.00 | 4.36E-01 |
| N-Methylnicotinamide                                                                      | Pyridines and derivatives        | 0.07  | -0.19 | 0.31  | 0.01 | 4.15E-01 |
| N6-Carbamoyl-L-threonyl-adenosine                                                         | Purine nucleosides               | 0.25  | 0.00  | 0.57  | 0.06 | 8.08E-04 |
| 6-Chloro-N-(1-methylethyl)-1,3,5-triazine-2,4-diamine                                     | Triazines                        | 0.25  | 0.06  | 0.42  | 0.18 | 8.66E-04 |
| L-alpha-Aspartyl-L-hydroxyproline                                                         | NA                               | 0.03  | -0.14 | 0.21  | 0.00 | 7.14E-01 |

|                                                        |                                  |       |       |       |      |          |
|--------------------------------------------------------|----------------------------------|-------|-------|-------|------|----------|
| Glutaminylaspartic acid                                | Carboxylic acids and derivatives | -0.20 | -0.34 | -0.01 | 0.06 | 8.03E-03 |
| N-Acetyldopamine                                       | Phenols                          | 0.02  | -0.16 | 0.20  | 0.00 | 8.12E-01 |
| 1,4-Dideoxy-1,4-imino-D-ribitol                        | Pyrrolidines                     | -0.11 | -0.25 | 0.05  | 0.01 | 1.64E-01 |
| Butyrylcarnitine                                       | Fatty Acyls                      | 0.16  | -0.08 | 0.50  | 0.02 | 4.65E-02 |
| Muricatacin                                            |                                  | -0.07 | -0.30 | 0.18  | 0.01 | 4.15E-01 |
| Sonchuionoside C                                       | Prenol lipids                    | -0.08 | -0.33 | 0.14  | 0.02 | 3.50E-01 |
| Lactosylceramide (d18:1/16:0)                          | Sphingolipids                    | 0.42  | 0.22  | 0.53  | 0.42 | 2.79E-09 |
| N-a-Acetyl-L-arginine                                  | Carboxylic acids and derivatives | 0.11  | -0.13 | 0.37  | 0.01 | 1.64E-01 |
| Avocadyne 4-acetate                                    | Fatty Acyls                      | 0.02  | -0.25 | 0.31  | 0.00 | 8.28E-01 |
| 4-(4-Methyl-3-pentenyl)-3-cyclohexene-1-carboxaldehyde | Prenol lipids                    | -0.21 | -0.36 | 0.01  | 0.07 | 4.86E-03 |
| 4-Hydroxymandelonitrile                                | NA                               | -0.19 | -0.49 | 0.09  | 0.06 | 1.45E-02 |
| L-Aspartic acid                                        | Carboxylic acids and derivatives | -0.09 | -0.40 | 0.17  | 0.05 | 2.57E-01 |
| LysoPE(0:0/22:1(13Z))                                  | Glycerophospholipids             | 0.00  | -0.31 | 0.25  | 0.00 | 9.90E-01 |
| Quinceoxepine                                          | Ethers                           | -0.31 | -0.50 | -0.04 | 0.26 | 2.79E-05 |
| 1-(beta-D-Ribofuranosyl)-1,4-dihydronicotinamide       | NA                               | -0.16 | -0.39 | 0.30  | 0.02 | 4.24E-02 |
| LysoPE(0:0/18:0)                                       | Glycerophospholipids             | 0.51  | 0.30  | 0.67  | 0.60 | 6.01E-14 |
| N1-Methyl-4-pyridone-3-carboxamide                     | Pyridines and derivatives        | -0.16 | -0.29 | 0.00  | 0.04 | 4.30E-02 |
| Imidazole-4-acetaldehyde                               | Azoles                           | -0.17 | -0.32 | 0.00  | 0.02 | 2.90E-02 |
| Capsiate                                               | Phenols                          | -0.36 | -0.56 | -0.10 | 0.87 | 5.24E-07 |
| 3-Dehydroxycarnitine                                   | Fatty Acyls                      | -0.07 | -0.45 | 0.20  | 0.01 | 3.91E-01 |
| LysoPE(22:5(4Z,7Z,10Z,13Z,16Z)/0:0)                    | Glycerophospholipids             | 0.39  | -0.04 | 0.58  | 0.40 | 3.89E-08 |
| Corchorifatty acid D                                   | Fatty Acyls                      | -0.29 | -0.49 | -0.02 | 0.38 | 7.39E-05 |
| SM(d18:1/24:1(15Z))                                    | Sphingolipids                    | 0.60  | 0.37  | 0.71  | 0.69 | 4.32E-20 |

|                                                                           |                                    |       |       |       |      |          |
|---------------------------------------------------------------------------|------------------------------------|-------|-------|-------|------|----------|
| HDMBOA-Glc                                                                | Organooxygen compounds             | 0.06  | -0.15 | 0.28  | 0.00 | 4.81E-01 |
| Dieporeticenin                                                            | Fatty Acyls                        | 0.14  | -0.09 | 0.36  | 0.02 | 7.28E-02 |
| LysoPE(18:2(9Z,12Z)/0:0)                                                  | Glycerophospholipids               | 0.36  | 0.02  | 0.60  | 0.32 | 8.21E-07 |
| Acrylamide                                                                | Carboximidic acids and derivatives | -0.26 | -0.38 | -0.11 | 0.13 | 5.16E-04 |
| N-Acetylneuraminic acid                                                   | Organooxygen compounds             | -0.11 | -0.30 | 0.09  | 0.01 | 1.77E-01 |
| Hydroxyisocaproic acid                                                    | Fatty Acyls                        | -0.16 | -0.30 | 0.03  | 0.02 | 3.89E-02 |
| Dihydrouracil                                                             | Diazines                           | -0.37 | -0.53 | -0.10 | 0.12 | 3.64E-07 |
| PC(16:0/16:0)                                                             | Glycerophospholipids               | 0.55  | 0.32  | 0.73  | 0.72 | 3.28E-16 |
| Indole                                                                    | Indoles and derivatives            | -0.26 | -0.46 | 0.04  | 0.10 | 5.27E-04 |
| Formiminoglutamic acid                                                    | Carboxylic acids and derivatives   | 0.03  | -0.21 | 0.27  | 0.00 | 7.47E-01 |
| PC(20:0/14:0)                                                             | Glycerophospholipids               | 0.60  | 0.28  | 0.73  | 0.67 | 6.44E-20 |
| PC(18:1(11Z)/14:0)                                                        | Glycerophospholipids               | 0.78  | 0.45  | 0.86  | 0.89 | 4.17E-41 |
| LysoPE(22:6(4Z,7Z,10Z,13Z,16Z,19Z)/0:0)                                   | Glycerophospholipids               | 0.41  | 0.04  | 0.57  | 0.42 | 7.05E-09 |
| Hypoxanthine                                                              | Imidazopyrimidines                 | -0.20 | -0.45 | -0.02 | 0.25 | 8.73E-03 |
| LysoPE(16:1(9Z)/0:0)                                                      | Glycerophospholipids               | 0.25  | -0.09 | 0.47  | 0.14 | 8.49E-04 |
| Glucosamine 6-phosphate                                                   | Organooxygen compounds             | -0.15 | -0.32 | 0.07  | 0.03 | 6.16E-02 |
| 2-Methylpiperidine                                                        | Piperidines                        | 0.01  | -0.13 | 0.17  | 0.00 | 9.11E-01 |
| 2-O-(5,8,11,14,17-Eicosapentaenoyl)-1-O-hexadecylglycero-3-phosphocholine | Glycerophospholipids               | 0.34  | 0.14  | 0.48  | 0.31 | 3.51E-06 |
| PE(16:0/20:4(5Z,8Z,11Z,14Z))                                              | Glycerophospholipids               | 0.54  | 0.31  | 0.68  | 0.66 | 6.44E-16 |
| 10-Nitrolinoleic acid                                                     | Fatty Acyls                        | -0.07 | -0.19 | 0.08  | 0.01 | 4.06E-01 |
| PE(22:5(4Z,7Z,10Z,13Z,16Z)/16:0)                                          | Glycerophospholipids               | 0.61  | 0.39  | 0.76  | 0.74 | 4.02E-21 |

|                                             |                                     |       |       |       |      |          |
|---------------------------------------------|-------------------------------------|-------|-------|-------|------|----------|
| 4-Hydroxy-L-glutamic acid                   | Organic acids and derivatives       | -0.02 | -0.24 | 0.17  | 0.00 | 8.14E-01 |
| Piperidine                                  | Fatty Acyls                         | 0.11  | -0.06 | 0.26  | 0.02 | 1.95E-01 |
| PE(16:0/18:2(9Z,12Z))                       | Glycerophospholipids                | 0.87  | 0.65  | 0.90  | 1.02 | 1.20E-59 |
| Montecristin                                | Fatty Acyls                         | 0.87  | 0.66  | 0.90  | 1.08 | 5.11E-59 |
| (4-Hydroxybenzoyl)choline                   | Carbonyl compounds                  | -0.10 | -0.26 | 0.05  | 0.01 | 2.15E-01 |
| Deoxyeritadenine                            | Imidazopyrimidines                  | 0.07  | -0.10 | 0.23  | 0.00 | 3.97E-01 |
| PC(18:3(6Z,9Z,12Z)/18:0)                    | Glycerophospholipids                | 0.65  | 0.36  | 0.79  | 0.64 | 1.35E-24 |
| Nephritogenoside                            | Fatty Acyls                         | 0.37  | 0.08  | 0.57  | 0.27 | 3.20E-07 |
| o-Ethyltoluene                              | Benzene and substituted derivatives | -0.27 | -0.48 | 0.04  | 0.15 | 2.51E-04 |
| PE(P-18:1(11Z)/18:3(6Z,9Z,12Z))             | Glycerophospholipids                | 0.53  | 0.33  | 0.65  | 0.44 | 6.24E-15 |
| beta-Alanine                                | Carboxylic acids and derivatives    | -0.25 | -0.51 | -0.02 | 0.04 | 8.74E-04 |
| PC(22:2(13Z,16Z)/P-18:0)                    | Glycerophospholipids                | 0.31  | 0.02  | 0.49  | 0.20 | 2.62E-05 |
| DG(18:4(6Z,9Z,12Z,15Z)/16:1(9Z)/0:0)        | Glycerolipids                       | 0.09  | -0.22 | 0.36  | 0.01 | 3.00E-01 |
| LysoPC(P-18:1(9Z))                          | Glycerophospholipids                | 0.24  | 0.03  | 0.39  | 0.19 | 1.32E-03 |
| MG(0:0/22:4(7Z,10Z,13Z,16Z)/0:0)            | Glycerolipids                       | 0.35  | 0.13  | 0.53  | 0.36 | 1.10E-06 |
| SM(d16:1/24:1(15Z))                         | Sphingolipids                       | 0.46  | 0.28  | 0.63  | 0.73 | 3.18E-11 |
| 4-Aminobutyraldehyde                        | Organooxygen compounds              | 0.04  | -0.14 | 0.22  | 0.00 | 6.22E-01 |
| 1-(Malonylamino)cyclopropanecarboxylic acid | Carboxylic acids and derivatives    | -0.57 | -0.73 | -0.30 | 0.72 | 9.40E-18 |
| Quercetin                                   | Flavonoids                          | -0.11 | -0.42 | 0.07  | 0.04 | 1.95E-01 |
| N-Acetyl-a-neuraminic acid                  | Organooxygen compounds              | -0.02 | -0.22 | 0.22  | 0.00 | 8.04E-01 |

|                                     |                                  |       |       |      |      |          |
|-------------------------------------|----------------------------------|-------|-------|------|------|----------|
| Ethyl trans-p-methoxycinnamate      | Cinnamic acids and derivatives   | -0.18 | -0.35 | 0.04 | 0.29 | 1.84E-02 |
| 4-Oxo-2-nonenal                     | Organooxygen compounds           | -0.17 | -0.30 | 0.01 | 0.05 | 3.21E-02 |
| 3-Methyl sulfolene                  | Dihydrothiophenes                | -0.06 | -0.25 | 0.15 | 0.01 | 4.43E-01 |
| PC(18:2(9Z,12Z)/18:0)               | Glycerophospholipids             | 0.79  | 0.44  | 0.87 | 0.74 | 2.61E-42 |
| SM(d17:1/24:0)                      | Sphingolipids                    | 0.36  | 0.11  | 0.51 | 0.28 | 4.76E-07 |
| L-Octanoylcarnitine                 | Fatty Acyls                      | 0.31  | 0.11  | 0.46 | 0.10 | 2.02E-05 |
| gamma-Glutamylglutamic acid         | Carboxylic acids and derivatives | 0.14  | -0.14 | 0.33 | 0.05 | 7.60E-02 |
| Ipomeatetrahydrofuran               | Prenol lipids                    | 0.04  | -0.22 | 0.32 | 0.00 | 6.15E-01 |
| LysoPE(20:5(5Z,8Z,11Z,14Z,17Z)/0:0) | Glycerophospholipids             | 0.12  | -0.17 | 0.39 | 0.04 | 1.46E-01 |
| Prolyl-Glutamine                    | Carboxylic acids and derivatives | -0.15 | -0.43 | 0.28 | 0.03 | 6.11E-02 |
| PC(22:5(7Z,10Z,13Z,16Z,19Z)/15:0)   | Glycerophospholipids             | 0.64  | 0.45  | 0.74 | 0.95 | 5.27E-23 |
| PC(20:2(11Z,14Z)/14:0)              | Glycerophospholipids             | 0.77  | 0.50  | 0.85 | 0.67 | 1.71E-38 |
| PC(20:1(11Z)/14:0)                  | Glycerophospholipids             | 0.67  | 0.31  | 0.78 | 0.81 | 1.41E-26 |
| (R)-2-Hydroxysterculic acid         | Fatty Acyls                      | -0.15 | -0.37 | 0.15 | 0.05 | 5.34E-02 |
| Fagomine                            | Piperidines                      | -0.20 | -0.44 | 0.01 | 0.04 | 9.45E-03 |
| Isoleucyl-Alanine                   | Carboxylic acids and derivatives | -0.15 | -0.32 | 0.09 | 0.03 | 5.18E-02 |
| Glutamyllysine                      | Carboxylic acids and derivatives | -0.01 | -0.18 | 0.16 | 0.00 | 9.38E-01 |
| PC(15:0/15:0)                       | Glycerophospholipids             | 0.72  | 0.42  | 0.82 | 1.15 | 9.96E-32 |
| MG(0:0/18:4(6Z,9Z,12Z,15Z)/0:0)     | Glycerolipids                    | -0.17 | -0.41 | 0.15 | 0.10 | 2.90E-02 |
| N2-Maltulosylarginine               | Saccharolipids                   | 0.09  | -0.08 | 0.27 | 0.05 | 2.54E-01 |
| PC(22:2(13Z,16Z)/16:1(9Z))          | Glycerophospholipids             | 0.77  | 0.38  | 0.86 | 0.85 | 2.37E-38 |
| SM(d18:1/20:0)                      | Sphingolipids                    | 0.50  | 0.29  | 0.64 | 0.48 | 1.91E-13 |
| Kojibiose                           | Fatty Acyls                      | -0.10 | -0.33 | 0.18 | 0.02 | 2.16E-01 |

|                                             |                                     |       |       |      |      |          |
|---------------------------------------------|-------------------------------------|-------|-------|------|------|----------|
| Cytokinin B                                 | Imidazopyrimidines                  | 0.16  | 0.01  | 0.44 | 0.05 | 3.79E-02 |
| DG(18:4(6Z,9Z,12Z,15Z)/14:1(9Z)/0:0)        | Glycerolipids                       | 0.12  | -0.21 | 0.39 | 0.02 | 1.53E-01 |
| PC(20:2(11Z,14Z)/20:4(5Z,8Z,11Z,14Z))       | Glycerophospholipids                | 0.72  | 0.41  | 0.81 | 0.97 | 9.96E-32 |
| SM(d17:1/24:1(15Z))                         | Sphingolipids                       | 0.72  | 0.50  | 0.79 | 0.78 | 1.59E-32 |
| SM(d18:0/18:1(9Z))                          | Sphingolipids                       | 0.59  | 0.40  | 0.69 | 0.66 | 3.57E-19 |
| 5beta-Cholestane-3alpha,7alpha,24,26-tetrol | NA                                  | 0.46  | 0.20  | 0.61 | 0.47 | 6.40E-11 |
| PC(22:5(4Z,7Z,10Z,13Z,16Z)/16:0)            | Glycerophospholipids                | 0.78  | 0.46  | 0.86 | 0.73 | 5.86E-41 |
| PC(22:5(4Z,7Z,10Z,13Z,16Z)/P-18:0)          | Glycerophospholipids                | 0.40  | 0.23  | 0.52 | 0.53 | 1.66E-08 |
| PC(24:0/14:1(9Z))                           | Glycerophospholipids                | 0.50  | 0.19  | 0.66 | 0.67 | 1.51E-13 |
| LysoPC(16:0)                                | Glycerophospholipids                | 0.20  | -0.05 | 0.38 | 0.10 | 8.49E-03 |
| Sialyllacto-N-tetraose b                    | Organooxygen compounds              | -0.07 | -0.24 | 0.14 | 0.01 | 3.91E-01 |
| SM(d18:1/14:0)                              | Sphingolipids                       | 0.43  | 0.19  | 0.65 | 0.49 | 1.23E-09 |
| PI(22:5(4Z,7Z,10Z,13Z,16Z)/16:0)            | Glycerophospholipids                | 0.59  | 0.23  | 0.77 | 0.45 | 4.19E-19 |
| Lactapiperanol D                            | Prenol lipids                       | -0.25 | -0.43 | 0.01 | 0.22 | 7.50E-04 |
| L-Gulonolactone                             | Lactones                            | -0.05 | -0.22 | 0.10 | 0.00 | 5.22E-01 |
| 2,6-Di-tert-butyl-4-ethylphenol             | Benzene and substituted derivatives | -0.20 | -0.43 | 0.08 | 0.12 | 7.99E-03 |
| PC(18:3(6Z,9Z,12Z)/18:1(11Z))               | Glycerophospholipids                | 0.50  | 0.26  | 0.67 | 0.64 | 3.05E-13 |
| PC(22:4(7Z,10Z,13Z,16Z)/16:0)               | Glycerophospholipids                | 0.42  | 0.17  | 0.64 | 0.52 | 1.72E-09 |
| PC(22:5(4Z,7Z,10Z,13Z,16Z)/15:0)            | Glycerophospholipids                | 0.85  | 0.58  | 0.90 | 1.18 | 4.20E-54 |
| PC(14:0/14:0)                               | Glycerophospholipids                | 0.61  | 0.29  | 0.73 | 0.92 | 4.02E-21 |
| dADP                                        | Purine nucleotides                  | -0.11 | -0.29 | 0.06 | 0.01 | 1.62E-01 |
| PC(20:1(11Z)/20:4(5Z,8Z,11Z,14Z))           | Glycerophospholipids                | 0.80  | 0.45  | 0.88 | 1.03 | 2.13E-43 |
| 3-Benzyl-4-heptanone                        | Benzene and substituted derivatives | 0.04  | -0.23 | 0.30 | 0.00 | 6.78E-01 |

|                                                                                     |                                          |       |       |       |      |          |
|-------------------------------------------------------------------------------------|------------------------------------------|-------|-------|-------|------|----------|
| Betonicine                                                                          | Carboxylic acids and derivatives         | 0.01  | -0.14 | 0.19  | 0.00 | 8.96E-01 |
| Diepomuricanin A                                                                    | NA                                       | 0.07  | -0.14 | 0.32  | 0.01 | 3.86E-01 |
| LysoPE(0:0/14:0)                                                                    | Glycerophospholipids                     | 0.16  | -0.18 | 0.38  | 0.11 | 3.59E-02 |
| SM(d18:0/14:0)                                                                      | Sphingolipids                            | 0.65  | 0.38  | 0.73  | 0.75 | 7.15E-24 |
| PC(20:2(11Z,14Z)/15:0)                                                              | Glycerophospholipids                     | 0.76  | 0.41  | 0.85  | 0.79 | 3.83E-37 |
| PC(22:2(13Z,16Z)/15:0)                                                              | Glycerophospholipids                     | 0.58  | 0.23  | 0.71  | 0.66 | 1.64E-18 |
| 2-(acetylamino)-1,5-anhydro-2-deoxy-3-O-b-D-galactopyranosyl-D-arabino-Hex-1-enitol | Organooxygen compounds                   | 0.15  | -0.15 | 0.35  | 0.05 | 6.05E-02 |
| PC(20:3(5Z,8Z,11Z)/20:0)                                                            | Glycerophospholipids                     | 0.53  | 0.25  | 0.66  | 0.92 | 2.62E-15 |
| LysoPC(18:2(9Z,12Z))                                                                | Glycerophospholipids                     | 0.45  | 0.06  | 0.64  | 0.46 | 1.11E-10 |
| Urothion                                                                            | Pteridines and derivatives               | 0.07  | -0.18 | 0.26  | 0.03 | 4.19E-01 |
| (2'E,4'Z,7'Z,8E)-Colnelenic acid                                                    | Fatty Acyls                              | -0.31 | -0.51 | -0.05 | 0.51 | 2.78E-05 |
| PC(20:0/20:2(11Z,14Z))                                                              | Glycerophospholipids                     | 0.54  | 0.24  | 0.68  | 1.09 | 6.27E-16 |
| Glycerylphosphorylethanolamine                                                      | Organic phosphoric acids and derivatives | -0.07 | -0.29 | 0.14  | 0.01 | 4.06E-01 |
| 6,10,14-Trimethyl-5,9,13-pentadecatrien-2-one                                       | Prenol lipids                            | -0.27 | -0.50 | 0.03  | 0.19 | 2.33E-04 |
| trans-3,4-Dihydro-4,8-dihydroxy-3-methyl-1H-2-benzopyran-1-one                      | Benzopyrans                              | -0.06 | -0.27 | 0.18  | 0.00 | 4.92E-01 |
| Pyridoxamine                                                                        | Pyridines and derivatives                | -0.05 | -0.20 | 0.12  | 0.00 | 5.63E-01 |
| PC(22:4(7Z,10Z,13Z,16Z)/14:0)                                                       | Glycerophospholipids                     | 0.71  | 0.37  | 0.82  | 0.75 | 3.22E-30 |
| PE(20:0/18:4(6Z,9Z,12Z,15Z))                                                        | Glycerophospholipids                     | 0.85  | 0.65  | 0.89  | 0.92 | 8.97E-55 |
| SM(d18:1/18:1(9Z))                                                                  | Sphingolipids                            | 0.62  | 0.41  | 0.72  | 0.68 | 1.81E-21 |
| Cohibin C                                                                           | Fatty Acyls                              | 0.73  | 0.38  | 0.85  | 0.86 | 3.72E-33 |
| 8-Hydroxy-2-octene-4,6-diynoic acid                                                 | Fatty Acyls                              | 0.00  | -0.19 | 0.23  | 0.00 | 9.98E-01 |

|                                                |                                     |       |       |       |      |          |
|------------------------------------------------|-------------------------------------|-------|-------|-------|------|----------|
| 5-Hydroxy-L-tryptophan                         | Indoles and derivatives             | -0.03 | -0.17 | 0.11  | 0.00 | 7.49E-01 |
| PC(20:4(8Z,11Z,14Z,17Z)/P-18:0)                | Glycerophospholipids                | 0.36  | 0.14  | 0.50  | 0.24 | 4.79E-07 |
| Phenylacetylglutamine                          | Carboxylic acids and derivatives    | 0.13  | -0.09 | 0.31  | 0.02 | 1.17E-01 |
| Isoeugenitol                                   | Benzopyrans                         | -0.23 | -0.41 | -0.01 | 0.06 | 2.55E-03 |
| PC(16:1(9Z)/16:1(9Z))                          | Glycerophospholipids                | 0.69  | 0.48  | 0.78  | 0.94 | 1.25E-28 |
| gamma-L-Glutamyl-gamma-L-glutamyl-L-methionine |                                     | 0.25  | -0.01 | 0.42  | 0.17 | 9.93E-04 |
| 3-Oxoadipic acid                               | Keto acids and derivatives          | -0.12 | -0.33 | 0.10  | 0.01 | 1.52E-01 |
| 6-Deoxohomodolichosterone                      | Steroids and steroid derivatives    | 0.54  | 0.30  | 0.66  | 0.60 | 2.08E-15 |
| PC(18:1(9Z)/P-18:1(11Z))                       | Glycerophospholipids                | 0.49  | 0.27  | 0.60  | 0.35 | 1.22E-12 |
| N-Salicyloylaspartic acid                      | Carboxylic acids and derivatives    | -0.27 | -0.40 | -0.10 | 0.05 | 3.08E-04 |
| Vanilpyruvic acid                              | Benzene and substituted derivatives | 0.01  | -0.16 | 0.15  | 0.00 | 9.36E-01 |
| PC(22:5(7Z,10Z,13Z,16Z,19Z)/16:1(9Z))          | Glycerophospholipids                | 0.76  | 0.45  | 0.83  | 0.90 | 6.38E-38 |
| LysoPC(22:6(4Z,7Z,10Z,13Z,16Z,19Z))            | Glycerophospholipids                | 0.40  | 0.09  | 0.56  | 0.34 | 1.81E-08 |
| Norsanguinarine                                | Quinolines and derivatives          | -0.09 | -0.27 | 0.11  | 0.01 | 3.08E-01 |
| 3-Methyl-5-pentyl-2-furanundecanoic acid       | Fatty Acyls                         | -0.27 | -0.50 | 0.04  | 0.13 | 2.23E-04 |
| 3-Aminopropionaldehyde                         | Organooxygen compounds              | -0.32 | -0.53 | -0.09 | 0.11 | 1.53E-05 |
| PC(22:5(7Z,10Z,13Z,16Z,19Z)/16:0)              | Glycerophospholipids                | 0.48  | 0.24  | 0.66  | 0.62 | 1.91E-12 |
| PC(20:3(8Z,11Z,14Z)/14:0)                      | Glycerophospholipids                | 0.52  | 0.24  | 0.65  | 0.62 | 1.06E-14 |

|                                                                                                                                |                                  |       |       |       |      |          |
|--------------------------------------------------------------------------------------------------------------------------------|----------------------------------|-------|-------|-------|------|----------|
| Dihydromaleimide                                                                                                               | NA                               | -0.31 | -0.52 | -0.07 | 0.15 | 1.96E-05 |
| 2,5-Dioxopentanoate                                                                                                            | Keto acids and derivatives       | -0.04 | -0.23 | 0.11  | 0.00 | 6.57E-01 |
| CS-S-Methylcysteine sulfoxide                                                                                                  | NA                               | -0.15 | -0.44 | 0.08  | 0.13 | 5.85E-02 |
| Oxonantenine                                                                                                                   | Aporphines                       | 0.01  | -0.31 | 0.26  | 0.00 | 9.35E-01 |
| DG(14:1(9Z)/18:3(6Z,9Z,12Z)/0:0)                                                                                               | Glycerolipids                    | -0.04 | -0.32 | 0.27  | 0.00 | 6.35E-01 |
| 2-Acetylpyridine                                                                                                               | Carbonyl compounds               | -0.07 | -0.24 | 0.11  | 0.00 | 4.31E-01 |
| 2-Hydroxy-6,7-dimethoxybenzoxazole                                                                                             | Benzoxazoles                     | 0.23  | -0.07 | 0.54  | 0.06 | 2.00E-03 |
| Perillyl acetate                                                                                                               | NA                               | -0.28 | -0.45 | -0.01 | 0.25 | 2.00E-04 |
| N-[(4E,8E)-1,3-dihydroxyoctadeca-4,8-dien-2-yl]hexadecanamide                                                                  | Sphingolipids                    | 0.25  | -0.01 | 0.41  | 0.18 | 8.42E-04 |
| Dihydro-3-(1-octenyl)-2,5-furandione                                                                                           | Oxolanes                         | -0.25 | -0.42 | -0.01 | 0.14 | 1.07E-03 |
| Artonin Q                                                                                                                      | Benzopyrans                      | 0.15  | -0.04 | 0.38  | 0.04 | 5.10E-02 |
| 2-Aminomuconic acid semialdehyde                                                                                               | Carboxylic acids and derivatives | -0.08 | -0.26 | 0.17  | 0.02 | 3.57E-01 |
| DG(20:4(8Z,11Z,14Z,17Z)/14:0/0:0)                                                                                              | Glycerolipids                    | 0.02  | -0.28 | 0.28  | 0.00 | 8.54E-01 |
| Lacto-N-triose I                                                                                                               | Organooxygen compounds           | 0.20  | -0.11 | 0.39  | 0.08 | 9.88E-03 |
| PC(P-18:1(9Z)/14:1(9Z))                                                                                                        | Glycerophospholipids             | 0.36  | 0.15  | 0.49  | 0.27 | 5.98E-07 |
| (2S,4S)-Pinnatanine                                                                                                            | Carboxylic acids and derivatives | 0.08  | -0.16 | 0.29  | 0.00 | 3.72E-01 |
| O-6-deoxy-a-L-galactopyranosyl-(1->2)-O-b-D-galactopyranosyl-(1->3)-2-(acetylamino)-1,5-anhydro-2-deoxy-D-arabino-Hex-1-enitol | Organooxygen compounds           | 0.31  | 0.06  | 0.47  | 0.18 | 2.25E-05 |
| Persicachrome                                                                                                                  | Prenol lipids                    | 0.48  | 0.09  | 0.62  | 0.49 | 6.07E-12 |
| L-trans-5-Hydroxy-2-piperidinecarboxylic acid                                                                                  | Carboxylic acids and derivatives | -0.06 | -0.23 | 0.11  | 0.00 | 4.64E-01 |

|                                              |                                  |       |       |       |      |          |
|----------------------------------------------|----------------------------------|-------|-------|-------|------|----------|
| 2-acetyl-1-alkyl-sn-glycero-3-phosphocholine | Glycerophospholipids             | 0.74  | 0.56  | 0.82  | 1.18 | 6.17E-35 |
| PC(16:1(9Z)/15:0)                            | Glycerophospholipids             | 0.76  | 0.40  | 0.87  | 0.87 | 1.22E-37 |
| LysoPC(P-16:0)                               | Glycerophospholipids             | 0.30  | 0.07  | 0.47  | 0.20 | 4.62E-05 |
| Phenol glucuronide                           | Organooxygen compounds           | 0.19  | -0.11 | 0.41  | 0.08 | 1.33E-02 |
| PC(18:3(6Z,9Z,12Z)/15:0)                     | Glycerophospholipids             | 0.57  | 0.33  | 0.72  | 0.61 | 1.27E-17 |
| PI(20:2(11Z,14Z)/18:2(9Z,12Z))               | Glycerophospholipids             | 0.56  | 0.20  | 0.72  | 0.62 | 3.39E-17 |
| Glycine                                      | Carboxylic acids and derivatives | -0.19 | -0.43 | 0.10  | 0.04 | 1.56E-02 |
| DG(14:1(9Z)/18:2(9Z,12Z)/0:0)                | Glycerolipids                    | -0.02 | -0.27 | 0.27  | 0.00 | 8.51E-01 |
| Epomusenin A                                 | Fatty Acyls                      | 0.72  | 0.49  | 0.80  | 0.62 | 1.43E-31 |
| Troloxerutin                                 | Flavonoids                       | 0.09  | -0.37 | 0.33  | 0.02 | 2.88E-01 |
| LysoPE(20:2(11Z,14Z)/0:0)                    | Glycerophospholipids             | 0.21  | -0.37 | 0.52  | 0.14 | 6.34E-03 |
| PE(P-18:1(11Z)/22:4(7Z,10Z,13Z,16Z))         | Glycerophospholipids             | 0.52  | 0.33  | 0.67  | 0.54 | 2.49E-14 |
| PC(22:4(7Z,10Z,13Z,16Z)/15:0)                | Glycerophospholipids             | 0.81  | 0.52  | 0.89  | 1.05 | 4.53E-45 |
| 1-Methylpyrrole                              | Pyrroles                         | 0.10  | -0.06 | 0.25  | 0.01 | 2.10E-01 |
| LysoPC(22:5(4Z,7Z,10Z,13Z,16Z))              | Glycerophospholipids             | 0.36  | 0.05  | 0.52  | 0.53 | 6.27E-07 |
| 5-Hydroxyindoleacetic acid                   | Indoles and derivatives          | -0.11 | -0.25 | 0.05  | 0.02 | 1.62E-01 |
| Seryltyrosine                                | Carboxylic acids and derivatives | 0.09  | -0.08 | 0.23  | 0.01 | 2.96E-01 |
| 5-Hydroxyisourate                            |                                  | -0.12 | -0.37 | 0.14  | 0.17 | 1.37E-01 |
| Lacto-N-biose I                              | Organooxygen compounds           | -0.30 | -0.48 | -0.06 | 0.12 | 4.81E-05 |
| PE(P-18:1(11Z)/18:2(9Z,12Z))                 | Glycerophospholipids             | 0.36  | 0.14  | 0.56  | 0.29 | 8.37E-07 |
| 3-(3,4-Dihydroxy-5-methoxy)-2-propenoic acid | Cinnamic acids and derivatives   | -0.18 | -0.32 | -0.01 | 0.02 | 2.36E-02 |

|                                                           |                                     |       |       |       |      |          |
|-----------------------------------------------------------|-------------------------------------|-------|-------|-------|------|----------|
| 4-Hydroxy-3-(16-methylheptadecyl)-2H-pyran-2-one          | Pyrans                              | -0.26 | -0.46 | 0.00  | 0.18 | 3.95E-04 |
| LysoPC(20:3(5Z,8Z,11Z))                                   | Glycerophospholipids                | 0.59  | 0.36  | 0.73  | 0.79 | 1.92E-19 |
| PI(20:3(5Z,8Z,11Z)/16:0)                                  | Glycerophospholipids                | 0.55  | 0.26  | 0.68  | 0.89 | 4.55E-16 |
| 1-(3,5-Dihydroxyphenyl)-2-pentadecanone                   | Phenols                             | 0.02  | -0.20 | 0.22  | 0.00 | 8.45E-01 |
| Glucocheirolin                                            | Organooxygen compounds              | -0.45 | -0.72 | -0.27 | 0.50 | 7.97E-11 |
| PE(18:1(9Z)/16:0)                                         | Glycerophospholipids                | 0.58  | 0.36  | 0.82  | 0.73 | 2.63E-18 |
| 5-Hydroxy-7-methoxy-2-tritriacontyl-4H-1-benzopyran-4-one | Benzopyrans                         | 0.37  | 0.13  | 0.51  | 0.39 | 2.18E-07 |
| DG(14:1(9Z)/22:5(4Z,7Z,10Z,13Z,16Z)/0:0)                  | Glycerolipids                       | 0.12  | -0.09 | 0.34  | 0.08 | 1.49E-01 |
| 12,13-EpOME                                               | Fatty Acyls                         | -0.26 | -0.46 | 0.04  | 0.17 | 5.54E-04 |
| PE(20:4(8Z,11Z,14Z,17Z)/P-16:0)                           | Glycerophospholipids                | 0.45  | 0.32  | 0.69  | 0.42 | 1.26E-10 |
| 3,5-Dichloro-4-hydroxy-2-methoxy-6-methylbenzoic acid     | Benzene and substituted derivatives | -0.18 | -0.36 | -0.02 | 0.02 | 1.84E-02 |
| Hydroxyphenylacetyl glycine                               | Carboxylic acids and derivatives    | -0.02 | -0.20 | 0.18  | 0.00 | 8.46E-01 |
| DG(22:4(7Z,10Z,13Z,16Z)/18:3(6Z,9Z,12Z)/0:0)              | Glycerolipids                       | -0.24 | -0.42 | -0.01 | 0.21 | 1.15E-03 |
| PC(22:6(4Z,7Z,10Z,13Z,16Z,19Z)/15:0)                      | Glycerophospholipids                | 0.77  | 0.55  | 0.83  | 1.04 | 1.07E-39 |
| PS(14:0/22:2(13Z,16Z))                                    | Glycerophospholipids                | 0.57  | 0.21  | 0.70  | 0.69 | 2.04E-17 |
| PC(20:4(8Z,11Z,14Z,17Z)/15:0)                             | Glycerophospholipids                | 0.54  | 0.38  | 0.68  | 0.69 | 9.97E-16 |
| Epiafzelechin 3-gallate                                   |                                     | -0.11 | -0.49 | 0.11  | 0.04 | 1.66E-01 |
| PE(18:1(11Z)/18:2(9Z,12Z))                                | Glycerophospholipids                | 0.46  | 0.28  | 0.65  | 0.61 | 3.16E-11 |
| PE(P-18:1(9Z)/16:1(9Z))                                   | Glycerophospholipids                | 0.48  | 0.35  | 0.73  | 0.46 | 5.96E-12 |
| Demethylated antipyrine                                   | Azoles                              | -0.19 | -0.39 | -0.01 | 0.06 | 1.58E-02 |
| PE(P-18:1(11Z)/22:5(4Z,7Z,10Z,13Z,16Z))                   | Glycerophospholipids                | 0.46  | 0.28  | 0.62  | 0.52 | 2.74E-11 |

|                                                    |                           |       |       |      |      |          |
|----------------------------------------------------|---------------------------|-------|-------|------|------|----------|
| 3-Fucosyllactose                                   | Organooxygen compounds    | -0.06 | -0.28 | 0.21 | 0.01 | 4.90E-01 |
| LysoPI(18:0/0:0)                                   | Glycerophospholipids      | 0.26  | 0.03  | 0.44 | 0.10 | 5.27E-04 |
| Isolinderanolide                                   | Tetrahydrofurans          | 0.36  | 0.01  | 0.60 | 0.31 | 4.58E-07 |
| PE(P-18:1(9Z)/20:3(5Z,8Z,11Z))                     | Glycerophospholipids      | 0.47  | 0.31  | 0.68 | 0.47 | 1.73E-11 |
| Marmesin rhamnoside                                | Coumarins and derivatives | 0.19  | 0.01  | 0.43 | 0.03 | 1.58E-02 |
| 1-Isothiocyanato-6-(methylthio)hexane              | Isothiocyanates           | 0.13  | -0.08 | 0.29 | 0.02 | 9.35E-02 |
| PE(P-18:1(9Z)/20:5(5Z,8Z,11Z,14Z,17Z))             | Glycerophospholipids      | 0.66  | 0.41  | 0.77 | 0.66 | 2.37E-25 |
| PC(P-16:0/18:4(6Z,9Z,12Z,15Z))                     | Glycerophospholipids      | 0.66  | 0.45  | 0.75 | 0.77 | 3.58E-25 |
| Obtusilactone A                                    | Tetrahydrofurans          | 0.08  | -0.20 | 0.35 | 0.01 | 3.46E-01 |
| PE(P-18:1(9Z)/18:1(9Z))                            | Glycerophospholipids      | 0.53  | 0.38  | 0.72 | 0.48 | 6.71E-15 |
| PE(22:6(4Z,7Z,10Z,13Z,16Z,19Z)/P-18:1(11Z))        | Glycerophospholipids      | 0.62  | 0.31  | 0.71 | 0.51 | 3.15E-21 |
| PE(20:4(5Z,8Z,11Z,14Z)/P-18:1(11Z))                | Glycerophospholipids      | 0.81  | 0.53  | 0.86 | 0.66 | 1.80E-45 |
| Cohibin B                                          | Fatty Acyls               | 0.20  | 0.00  | 0.34 | 0.06 | 9.83E-03 |
| Dide-O-methyl-4-O-alpha-D-glucopyranosylsimmondsin | Organooxygen compounds    | 0.14  | -0.11 | 0.31 | 0.02 | 7.91E-02 |
| PC(P-18:1(9Z)/16:1(9Z))                            | Glycerophospholipids      | 0.02  | -0.13 | 0.19 | 0.00 | 7.91E-01 |
| 1-Isothiocyanato-6-(methylsulfinyl)hexane          | Sulfoxides                | 0.18  | 0.03  | 0.29 | 0.04 | 1.86E-02 |
| PC(20:3(8Z,11Z,14Z)/15:0)                          | Glycerophospholipids      | 0.84  | 0.56  | 0.88 | 1.07 | 7.18E-52 |
| 3-Isopropenylpentanedioic acid                     | Fatty Acyls               | 0.09  | -0.16 | 0.49 | 0.00 | 2.85E-01 |
| PE(P-16:0/20:4(5Z,8Z,11Z,14Z))                     | Glycerophospholipids      | 0.78  | 0.53  | 0.87 | 0.74 | 8.74E-40 |
| Glaucarubin                                        | Prenol lipids             | 0.05  | -0.20 | 0.28 | 0.01 | 5.72E-01 |
| PE(22:2(13Z,16Z)/18:1(11Z))                        | Glycerophospholipids      | 0.69  | 0.35  | 0.78 | 0.84 | 5.11E-28 |
| PE(P-18:0/18:2(9Z,12Z))                            | Glycerophospholipids      | 0.72  | 0.49  | 0.81 | 0.63 | 3.28E-32 |
| Melleolide M                                       | Prenol lipids             | -0.07 | -0.32 | 0.15 | 0.02 | 4.27E-01 |
| PE(P-18:0/22:4(7Z,10Z,13Z,16Z))                    | Glycerophospholipids      | 0.68  | 0.41  | 0.79 | 0.70 | 2.75E-27 |

|                                      |                      |       |       |       |      |          |
|--------------------------------------|----------------------|-------|-------|-------|------|----------|
| Metiamide                            | Azoles               | -0.29 | -0.48 | -0.01 | 0.14 | 8.92E-05 |
| PS(18:0/22:6(4Z,7Z,10Z,13Z,16Z,19Z)) | Glycerophospholipids | 0.53  | 0.21  | 0.70  | 0.83 | 2.89E-15 |

---

**Table S5.** Details of PC3 results

| Metabolites                                    | Class                            | PCA<br>loadings | Bootstrap CI of<br>loadings |       | Contribution (%) | FDR      |
|------------------------------------------------|----------------------------------|-----------------|-----------------------------|-------|------------------|----------|
|                                                |                                  |                 | Lower                       | Upper |                  |          |
| 3,3,5-triiodo-L-thyronine-beta-D-glucuronoside | Carboxylic acids and derivatives | 0.17            | -0.13                       | 0.41  | 0.04             | 3.65E-02 |
| Cellobiose                                     | Organooxygen compounds           | -0.06           | -0.24                       | 0.17  | 0.01             | 5.24E-01 |
| Adenine                                        | Imidazopyrimidines               | 0.08            | -0.23                       | 0.28  | 0.02             | 3.46E-01 |
| 1-Amino-propan-2-ol                            | Organonitrogen compounds         | 0.03            | -0.29                       | 0.40  | 0.00             | 7.70E-01 |
| 1-Pyrroline                                    | Pyrrolines                       | 0.16            | -0.18                       | 0.34  | 0.05             | 4.76E-02 |
| Rheidin A                                      | Anthracenes                      | 0.10            | -0.26                       | 0.43  | 0.03             | 2.39E-01 |
| 1-Kestose                                      | Organooxygen compounds           | -0.18           | -0.36                       | 0.07  | 0.06             | 2.33E-02 |
| Niacinamide                                    | Pyridines and derivatives        | 0.12            | -0.16                       | 0.34  | 0.05             | 1.40E-01 |
| 5-Methylcytidine                               | Pyrimidine nucleosides           | 0.36            | 0.02                        | 0.60  | 0.21             | 7.23E-07 |
| Yuccaol C                                      | 2-arylbenzofuran flavonoids      | -0.18           | -0.38                       | 0.10  | 0.06             | 2.19E-02 |
| Adenosine                                      | Purine nucleosides               | 0.33            | 0.07                        | 0.42  | 0.44             | 1.34E-05 |
| 1-Methylinosine                                | Purine nucleosides               | 0.20            | -0.24                       | 0.46  | 0.08             | 1.24E-02 |
| Choline                                        | Organonitrogen compounds         | 0.16            | -0.35                       | 0.54  | 0.03             | 4.78E-02 |
| D-Proline                                      | Carboxylic acids and derivatives | -0.06           | -0.32                       | 0.33  | 0.00             | 5.45E-01 |

|                                                     |                                           |       |       |      |      |          |
|-----------------------------------------------------|-------------------------------------------|-------|-------|------|------|----------|
| 1H-Pyrrole-2-carboxaldehyde                         | Organooxygen compounds                    | 0.00  | -0.24 | 0.20 | 0.00 | 9.67E-01 |
| 4-Aminophenol                                       | Benzene and substituted derivatives       | 0.02  | -0.19 | 0.19 | 0.00 | 8.15E-01 |
| Pyrrolidonecarboxylic acid                          | Carboxylic acids and derivatives          | 0.34  | -0.04 | 0.56 | 0.20 | 5.85E-06 |
| Uracil                                              | Diazines                                  | 0.27  | -0.13 | 0.52 | 0.17 | 4.49E-04 |
| 5-Aminopentanoic acid                               | Carboxylic acids and derivatives          | -0.38 | -0.51 | 0.00 | 0.38 | 2.31E-07 |
| 5,12-dihydroxy-6,8,10,14,17-eicosapentaenoic acid   | NA                                        | 0.30  | -0.02 | 0.43 | 1.02 | 5.85E-05 |
| Kynurenic acid                                      | Quinolines and derivatives                | -0.11 | -0.36 | 0.17 | 0.04 | 1.72E-01 |
| Cytidine monophosphate                              | Pyrimidine nucleotides                    | 0.23  | -0.22 | 0.57 | 0.16 | 2.83E-03 |
| N2,N2-Dimethylguanosine                             | Purine nucleosides                        | -0.02 | -0.42 | 0.37 | 0.00 | 8.51E-01 |
| Gonyautoxin VI                                      | Saxitoxins, gonyautoxins, and derivatives | 0.25  | -0.22 | 0.55 | 0.14 | 1.40E-03 |
| 4-(3,4-Dihydroxyphenyl)-2-hydroxy-1H-phenalen-1-one | Naphthalenes                              | 0.04  | -0.15 | 0.19 | 0.00 | 7.07E-01 |
| Guanine                                             | Imidazopyrimidines                        | 0.42  | 0.08  | 0.54 | 0.54 | 6.52E-09 |
| Nicotinamide ribotide                               | NA                                        | -0.07 | -0.50 | 0.48 | 0.03 | 4.18E-01 |
| Prolyl-Aspartate                                    | Carboxylic acids and derivatives          | -0.26 | -0.56 | 0.23 | 0.12 | 8.61E-04 |
| 1-Methylnicotinamide                                | Pyridines and derivatives                 | -0.23 | -0.36 | 0.03 | 0.08 | 2.69E-03 |

|                                            |                                        |       |       |      |      |          |
|--------------------------------------------|----------------------------------------|-------|-------|------|------|----------|
| Pipecolic acid                             | Carboxylic acids and derivatives       | -0.01 | -0.40 | 0.35 | 0.00 | 8.88E-01 |
| N-Ornithyl-L-aurine                        | Carboxylic acids and derivatives       | -0.10 | -0.35 | 0.23 | 0.03 | 2.39E-01 |
| D-Maltose                                  | Organooxygen compounds                 | 0.37  | -0.04 | 0.52 | 0.25 | 3.73E-07 |
| 2-O-(6-Phospho-alpha-mannosyl)-D-glycerate | Organooxygen compounds                 | 0.00  | -0.20 | 0.17 | 0.00 | 9.91E-01 |
| Taurine                                    | Organic sulfonic acids and derivatives | -0.04 | -0.24 | 0.24 | 0.00 | 7.07E-01 |
| 2-O-Galloylsucrose                         | Benzene and substituted derivatives    | 0.27  | -0.20 | 0.53 | 0.35 | 4.92E-04 |
| L-Asparagine                               | Carboxylic acids and derivatives       | 0.13  | -0.16 | 0.29 | 0.05 | 1.19E-01 |
| Pyrrolidine                                | Pyrrolidines                           | 0.05  | -0.17 | 0.24 | 0.01 | 6.22E-01 |
| Protoanemonin                              | Dihydrofurans                          | -0.43 | -0.61 | 0.13 | 0.44 | 2.56E-09 |
| Xanthotoxol glucoside                      | Coumarins and derivatives              | -0.18 | -0.46 | 0.21 | 0.07 | 2.52E-02 |
| L-Threonine                                | Carboxylic acids and derivatives       | 0.32  | -0.01 | 0.46 | 0.21 | 1.51E-05 |
| 1-Methyladenosine                          | Purine nucleosides                     | 0.34  | -0.03 | 0.51 | 0.25 | 3.36E-06 |
| Propionylcarnitine                         | Fatty Acyls                            | -0.36 | -0.52 | 0.01 | 0.25 | 1.37E-06 |
| Phenylacetaldehyde                         | Benzene and substituted derivatives    | -0.22 | -0.57 | 0.08 | 0.13 | 4.28E-03 |
| N4-Acetylcytidine                          | Pyrimidine nucleosides                 | 0.40  | 0.11  | 0.66 | 0.71 | 4.86E-08 |
| 2,5-Dihydro-2,4-dimethyloxazole            | Azolines                               | -0.02 | -0.16 | 0.14 | 0.00 | 8.66E-01 |

|                                           |                                     |       |       |      |      |          |
|-------------------------------------------|-------------------------------------|-------|-------|------|------|----------|
| 3-Methylhistidine                         | Carboxylic acids and derivatives    | 0.01  | -0.26 | 0.29 | 0.00 | 8.76E-01 |
| Sphinganine                               | Organonitrogen compounds            | -0.04 | -0.22 | 0.14 | 0.02 | 6.78E-01 |
| Chondroitin                               | Organooxygen compounds              | 0.12  | -0.18 | 0.38 | 0.02 | 1.59E-01 |
| 2-Methylfuran                             | Heteroaromatic compounds            | -0.39 | -0.56 | 0.14 | 2.18 | 1.24E-07 |
| trans-3,3',4',5,5',7-Hexahydroxyflavanone | NA                                  | -0.02 | -0.21 | 0.16 | 0.00 | 8.67E-01 |
| Acetylhydrazine                           | Carboxylic acids and derivatives    | 0.36  | -0.02 | 0.52 | 0.19 | 1.37E-06 |
| Turanose                                  | Fatty Acyls                         | 0.18  | -0.10 | 0.37 | 0.05 | 2.40E-02 |
| L-Palmitoylcarnitine                      | Fatty Acyls                         | 0.01  | -0.18 | 0.26 | 0.00 | 8.82E-01 |
| Lacto-N-fucopentaose III                  | Organooxygen compounds              | 0.29  | -0.09 | 0.52 | 0.25 | 1.04E-04 |
| 3-Acetamidobutanal                        | Organooxygen compounds              | 0.14  | -0.10 | 0.31 | 0.03 | 8.76E-02 |
| 4-Aminohippuric acid                      | Benzene and substituted derivatives | -0.28 | -0.44 | 0.03 | 0.15 | 2.76E-04 |
| L-Phenylalanine                           | Carboxylic acids and derivatives    | 0.22  | -0.07 | 0.45 | 0.08 | 4.35E-03 |
| Methyl 2-furoate                          | Furans                              | -0.50 | -0.65 | 0.12 | 0.49 | 1.59E-12 |
| N-Hexadecanoylpyrrolidine                 | Pyrrolidines                        | 0.12  | -0.23 | 0.41 | 0.05 | 1.60E-01 |
| 1-Methylhypoxanthine                      | NA                                  | 0.17  | -0.27 | 0.44 | 0.06 | 3.00E-02 |
| erythro-Isoleucine                        | NA                                  | 0.05  | -0.22 | 0.32 | 0.00 | 5.89E-01 |
| L-Acetylcarnitine                         | Fatty Acyls                         | -0.43 | -0.64 | 0.00 | 0.16 | 3.50E-09 |
| Trigonelline                              |                                     | -0.18 | -0.32 | 0.08 | 0.16 | 2.06E-02 |

|                        |                                     |       |       |      |      |          |
|------------------------|-------------------------------------|-------|-------|------|------|----------|
| D-Serine               | Carboxylic acids and derivatives    | 0.27  | -0.08 | 0.53 | 0.17 | 4.20E-04 |
| 1-Methylguanosine      | Purine nucleosides                  | 0.11  | -0.21 | 0.40 | 0.02 | 1.86E-01 |
| Uridine                | Pyrimidine nucleosides              | 0.25  | -0.17 | 0.52 | 0.15 | 9.31E-04 |
| 2,5-Dimethyloxazole    | Azoles                              | -0.43 | -0.64 | 0.11 | 0.55 | 1.57E-09 |
| Adenosine 2'-phosphate | Organooxygen compounds              | 0.26  | -0.32 | 0.72 | 0.44 | 5.70E-04 |
| Cytidine               | Pyrimidine nucleosides              | 0.08  | -0.16 | 0.30 | 0.02 | 3.93E-01 |
| 5'-Methylthioadenosine | 5'-deoxyribonucleosides             | 0.16  | -0.06 | 0.41 | 0.08 | 5.20E-02 |
| L-Lysine               | Carboxylic acids and derivatives    | 0.00  | -0.34 | 0.33 | 0.00 | 9.81E-01 |
| Piperidine             | Piperidines                         | 0.14  | -0.13 | 0.33 | 0.03 | 9.82E-02 |
| 3-Methylguanine        | Imidazopyrimidines                  | 0.19  | -0.26 | 0.44 | 0.10 | 1.84E-02 |
| Thiamine monophosphate | Diazines                            | 0.11  | -0.39 | 0.60 | 0.03 | 1.72E-01 |
| Sorbose 1-phosphate    | Organooxygen compounds              | 0.04  | -0.17 | 0.20 | 0.00 | 6.63E-01 |
| Trimethylamine N-oxide | Organonitrogen compounds            | -0.19 | -0.34 | 0.12 | 0.10 | 1.74E-02 |
| D-Glutamine            | Carboxylic acids and derivatives    | 0.29  | -0.01 | 0.48 | 0.33 | 9.70E-05 |
| 2-Butenal              | NA                                  | -0.44 | -0.65 | 0.15 | 0.92 | 6.24E-10 |
| Styrene                | Benzene and substituted derivatives | 0.24  | -0.03 | 0.37 | 0.14 | 1.74E-03 |
| Anserine               | Peptidomimetics                     | 0.11  | -0.11 | 0.25 | 0.05 | 2.05E-01 |

|                            |                                     |       |       |      |      |          |
|----------------------------|-------------------------------------|-------|-------|------|------|----------|
| Oleamide                   | Fatty Acyls                         | -0.04 | -0.29 | 0.28 | 0.00 | 6.63E-01 |
| Solasodine                 | Steroids and steroid derivatives    | 0.27  | 0.00  | 0.41 | 0.82 | 3.33E-04 |
| Dihydroneopterin phosphate | Pteridines and derivatives          | 0.22  | -0.43 | 0.54 | 0.11 | 5.31E-03 |
| Diethanolamine             | Organonitrogen compounds            | 0.17  | -0.06 | 0.33 | 0.06 | 2.98E-02 |
| 2-Fucosyllactose           | Organooxygen compounds              | -0.38 | -0.62 | 0.29 | 0.64 | 2.96E-07 |
| Nicotine                   | Pyridines and derivatives           | 0.02  | -0.17 | 0.17 | 0.00 | 8.67E-01 |
| Spinacetin 3-gentiobioside | Flavonoids                          | -0.45 | -0.65 | 0.18 | 2.02 | 5.24E-10 |
| Citrulline                 | Carboxylic acids and derivatives    | 0.31  | -0.05 | 0.47 | 0.21 | 2.87E-05 |
| 4-Hydroxybenzaldehyde      | Organooxygen compounds              | 0.04  | -0.15 | 0.31 | 0.01 | 6.79E-01 |
| Prolyl-Arginine            | Carboxylic acids and derivatives    | -0.01 | -0.37 | 0.27 | 0.00 | 9.08E-01 |
| Pantothenic acid           | Alcohols and polyols                | -0.05 | -0.25 | 0.12 | 0.01 | 6.22E-01 |
| L-Valine                   | Carboxylic acids and derivatives    | 0.34  | -0.07 | 0.50 | 0.17 | 3.95E-06 |
| 3-Amino-2-piperidone       | Carboxylic acids and derivatives    | -0.08 | -0.25 | 0.13 | 0.01 | 3.48E-01 |
| Uralenneoside              | Benzene and substituted derivatives | -0.20 | -0.41 | 0.21 | 0.08 | 9.45E-03 |
| Lactaldehyde               | Organooxygen compounds              | 0.05  | -0.25 | 0.36 | 0.01 | 6.22E-01 |

|                                                                   |                                     |       |       |      |      |          |
|-------------------------------------------------------------------|-------------------------------------|-------|-------|------|------|----------|
| Mesalazine                                                        | Benzene and substituted derivatives | -0.06 | -0.21 | 0.14 | 0.01 | 5.40E-01 |
| Muscomin                                                          | Homoisoflavonoids                   | 0.29  | 0.01  | 0.44 | 0.13 | 9.32E-05 |
| Urocanic acid                                                     | Azoles                              | 0.03  | -0.21 | 0.26 | 0.01 | 7.19E-01 |
| Dimethyl dialkyl ammonium chloride                                | Quaternary ammonium salts           | 0.27  | -0.11 | 0.47 | 0.99 | 3.21E-04 |
| NAD                                                               | (5'->5')-dinucleotides              | 0.35  | -0.04 | 0.55 | 0.49 | 3.11E-06 |
| Sialyl-Lewis X                                                    | Organooxygen compounds              | 0.30  | 0.00  | 0.50 | 0.33 | 6.46E-05 |
| N-Acetylhistidine                                                 | Carboxylic acids and derivatives    | -0.16 | -0.38 | 0.13 | 0.05 | 4.84E-02 |
| 3alpha,4,5,7alpha-Tetrahydro-5-hydroxy-1H-isoindole-1,3(2H)-dione | Isoindoles and derivatives          | 0.43  | 0.13  | 0.57 | 0.48 | 1.57E-09 |
| 2-Acetyl-3,6-dimethylpyrazine                                     | Carbonyl compounds                  | -0.01 | -0.20 | 0.18 | 0.00 | 8.88E-01 |
| Homo-L-arginine                                                   | Carboxylic acids and derivatives    | 0.34  | -0.12 | 0.51 | 0.36 | 4.70E-06 |
| 3,4',5,6-Tetrahydroxy-3',7-dimethoxyflavone 3-glucuronide         | Flavonoids                          | 0.17  | -0.23 | 0.46 | 0.12 | 2.96E-02 |
| L-Arginine                                                        | Carboxylic acids and derivatives    | 0.14  | -0.37 | 0.49 | 0.05 | 7.55E-02 |
| Ornithine                                                         | Carboxylic acids and derivatives    | -0.15 | -0.28 | 0.05 | 0.06 | 6.20E-02 |
| Biliverdin                                                        | Tetrapyrroles and derivatives       | 0.06  | -0.20 | 0.26 | 0.02 | 5.20E-01 |
| 4,8 Dimethylnonanoyl carnitine                                    | Fatty Acyls                         | 0.12  | -0.10 | 0.27 | 0.11 | 1.33E-01 |

|                                                           |                                  |       |       |      |      |          |
|-----------------------------------------------------------|----------------------------------|-------|-------|------|------|----------|
| S-Adenosylmethionine                                      | 5'-deoxyribonucleosides          | 0.37  | -0.01 | 0.64 | 0.46 | 5.94E-07 |
| 1,2,3,4-Tetrahydro-b-carboline-1,3-dicarboxylic acid      | Harmala alkaloids                | 0.04  | -0.11 | 0.19 | 0.00 | 6.87E-01 |
| Spinatoside                                               | Flavonoids                       | 0.29  | -0.17 | 0.55 | 0.38 | 1.12E-04 |
| 5-Methyl-2-furancarboxaldehyde                            | Carbonyl compounds               | -0.42 | -0.62 | 0.15 | 2.99 | 5.20E-09 |
| Tryptophan                                                | NA                               | 0.11  | -0.12 | 0.39 | 0.02 | 1.80E-01 |
| O-Acetylserine                                            | Carboxylic acids and derivatives | 0.44  | 0.09  | 0.61 | 0.23 | 6.24E-10 |
| (9S,10E,12Z,15Z)-9-Hydroxy-10,12,15-octadecatrienoic acid | Lineolic acids and derivatives   | 0.28  | -0.02 | 0.40 | 0.43 | 2.89E-04 |
| FAPy-adenine                                              | Diazines                         | 0.16  | -0.15 | 0.40 | 0.09 | 4.80E-02 |
| 5-HEPE                                                    | Fatty Acyls                      | -0.02 | -0.20 | 0.15 | 0.01 | 8.21E-01 |
| 7-Aminoclonazepam                                         | Benzodiazepines                  | -0.10 | -0.40 | 0.39 | 0.06 | 2.56E-01 |
| Linoleamide                                               | Fatty Acyls                      | 0.03  | -0.21 | 0.29 | 0.00 | 7.94E-01 |
| Gerberinol                                                | Coumarins and derivatives        | 0.06  | -0.20 | 0.36 | 0.01 | 4.83E-01 |
| Saccharopine                                              | Carboxylic acids and derivatives | -0.08 | -0.31 | 0.22 | 0.03 | 3.86E-01 |
| Pyroglutamic acid                                         | Carboxylic acids and derivatives | 0.32  | 0.02  | 0.50 | 1.32 | 1.85E-05 |
| LysoPE(18:1(9Z)/0:0)                                      | Glycerophospholipids             | 0.46  | 0.03  | 0.67 | 0.77 | 1.79E-10 |
| Octadecanamide                                            | Fatty Acyls                      | 0.01  | -0.28 | 0.37 | 0.00 | 8.72E-01 |
| DG(22:5(7Z,10Z,13Z,16Z,19Z)/16:1(9Z)/0:0)                 | Glycerolipids                    | 0.26  | 0.02  | 0.36 | 0.30 | 5.55E-04 |

|                                    |                                               |       |       |      |      |          |
|------------------------------------|-----------------------------------------------|-------|-------|------|------|----------|
| Trimethylaminoacetone              | Organooxygen compounds                        | -0.13 | -0.26 | 0.11 | 0.03 | 1.02E-01 |
| Cholesterol                        | Steroids and steroid derivatives              | -0.22 | -0.40 | 0.08 | 0.25 | 5.31E-03 |
| 1-Salicylate glucuronide           | Organooxygen compounds                        | -0.04 | -0.27 | 0.13 | 0.00 | 6.71E-01 |
| Racemethionine                     | NA                                            | 0.16  | -0.03 | 0.32 | 0.05 | 5.22E-02 |
| Allysine                           | Carboxylic acids and derivatives              | 0.04  | -0.19 | 0.25 | 0.01 | 6.75E-01 |
| Pyro-L-glutaminy-L-glutamine       | Carboxylic acids and derivatives              | 0.43  | 0.04  | 0.64 | 0.41 | 2.42E-09 |
| UDP-N-acetyl-alpha-D-galactosamine | Pyrimidine nucleotides                        | 0.29  | -0.09 | 0.59 | 0.45 | 1.13E-04 |
| 4-Amino-2-methylenebutanoic acid   | Carboxylic acids and derivatives              | -0.04 | -0.19 | 0.11 | 0.00 | 7.08E-01 |
| 2-Furanmethanol                    | Heteroaromatic compounds                      | -0.47 | -0.65 | 0.03 | 0.88 | 5.72E-11 |
| Ecgonine                           | Tropane alkaloids                             | -0.20 | -0.37 | 0.09 | 0.09 | 1.35E-02 |
| 5,6-Dihydroxyindole                | Indoles and derivatives                       | -0.04 | -0.21 | 0.18 | 0.00 | 6.87E-01 |
| Valyl-Lysine                       | Carboxylic acids and derivatives              | 0.09  | -0.32 | 0.39 | 0.01 | 2.81E-01 |
| AICA-riboside                      | Imidazole ribonucleosides and ribonucleotides | 0.19  | -0.05 | 0.35 | 0.15 | 1.79E-02 |
| Beta-D-Glucopyranuronic acid       | Organooxygen compounds                        | 0.02  | -0.52 | 0.32 | 0.00 | 8.63E-01 |
| 3-Oxohexadecanoyl-CoA              | Fatty Acyls                                   | -0.04 | -0.35 | 0.42 | 0.01 | 6.71E-01 |
| Homoarecoline                      |                                               | -0.13 | -0.25 | 0.08 | 0.04 | 1.14E-01 |

|                                  |                                           |       |       |      |      |          |
|----------------------------------|-------------------------------------------|-------|-------|------|------|----------|
| Lacto-N-difucopentaose II        | Organooxygen compounds                    | -0.16 | -0.38 | 0.23 | 0.09 | 5.15E-02 |
| LysoPE(0:0/22:4(7Z,10Z,13Z,16Z)) | Glycerophospholipids                      | 0.59  | 0.11  | 0.69 | 1.35 | 6.22E-18 |
| alpha-Zearalenol                 | Macrolides and analogues                  | 0.34  | 0.00  | 0.52 | 0.25 | 3.36E-06 |
| L-Tyrosine                       | Carboxylic acids and derivatives          | 0.14  | -0.15 | 0.42 | 0.07 | 9.82E-02 |
| LysoPE(20:1(11Z)/0:0)            | Glycerophospholipids                      | 0.58  | 0.14  | 0.68 | 1.39 | 6.70E-18 |
| Thiamine                         | Diazines                                  | 0.23  | -0.23 | 0.52 | 0.22 | 3.12E-03 |
| LysoPE(16:0/0:0)                 | Glycerophospholipids                      | 0.25  | -0.08 | 0.45 | 0.24 | 9.88E-04 |
| Guanosine                        | Purine nucleosides                        | 0.06  | -0.21 | 0.26 | 0.01 | 5.28E-01 |
| LysoPE(0:0/18:3(6Z,9Z,12Z))      | Glycerophospholipids                      | 0.58  | 0.21  | 0.67 | 1.58 | 6.53E-18 |
| beta-Lactose                     | Carbohydrates and carbohydrate conjugates | -0.42 | -0.58 | 0.06 | 1.08 | 6.26E-09 |
| 3,4,5-Trimethoxycinnamic acid    | Cinnamic acids and derivatives            | -0.32 | -0.65 | 0.37 | 0.25 | 1.71E-05 |
| Delta-12-Prostaglandin J2        | Fatty Acyls                               | 0.10  | -0.16 | 0.25 | 0.15 | 2.51E-01 |
| N-Acetyl-L-alanine               | Carboxylic acids and derivatives          | -0.07 | -0.24 | 0.15 | 0.01 | 4.50E-01 |
| 3-Hydroxyisovalerylcarnitine     | Fatty Acyls                               | -0.15 | -0.44 | 0.29 | 0.07 | 7.42E-02 |
| Nicotinic acid                   | Pyridines and derivatives                 | -0.04 | -0.39 | 0.24 | 0.00 | 6.43E-01 |
| 4-Acetyl-3-methylpyridine        | Carbonyl compounds                        | 0.04  | -0.18 | 0.36 | 0.00 | 7.10E-01 |

|                                       |                                     |       |       |      |      |          |
|---------------------------------------|-------------------------------------|-------|-------|------|------|----------|
| Phosphocreatine                       | Carboxylic acids and derivatives    | -0.24 | -0.67 | 0.42 | 0.86 | 1.84E-03 |
| Palmitoylethanolamide                 | Carboximidic acids and derivatives  | -0.05 | -0.27 | 0.25 | 0.01 | 6.22E-01 |
| 3'-Sialyllactose                      | Organooxygen compounds              | -0.11 | -0.51 | 0.40 | 0.02 | 1.71E-01 |
| 2-Aminoacrylic acid                   | Carboxylic acids and derivatives    | 0.32  | -0.11 | 0.61 | 0.73 | 1.98E-05 |
| 2,4-Dimethyloxazole                   | Azoles                              | -0.09 | -0.32 | 0.14 | 0.01 | 2.98E-01 |
| LysoPE(0:0/20:4(5Z,8Z,11Z,14Z))       | Glycerophospholipids                | 0.63  | 0.22  | 0.72 | 1.49 | 1.41E-20 |
| 2-Azetidinecarboxylic acid            | NA                                  | 0.28  | 0.00  | 0.42 | 0.09 | 1.91E-04 |
| Epsilon-caprolactam                   | Lactams                             | 0.15  | -0.19 | 0.36 | 0.06 | 6.94E-02 |
| Polyoxyethylene (600) monoricinoleate | Fatty Acyls                         | 0.07  | -0.26 | 0.36 | 0.02 | 4.54E-01 |
| 1,3-Diisopropylbenzene                | Benzene and substituted derivatives | 0.33  | -0.02 | 0.49 | 0.25 | 6.47E-06 |
| Triethanolamine                       | Amines                              | 0.14  | -0.09 | 0.27 | 0.11 | 8.69E-02 |
| Aminofructose 6-phosphate             | Organooxygen compounds              | 0.15  | -0.23 | 0.43 | 0.05 | 6.20E-02 |
| 1-Methyl-1,3-cyclohexadiene           | Olefins                             | 0.36  | -0.08 | 0.53 | 0.27 | 9.83E-07 |
| Epidermin                             | Organooxygen compounds              | -0.30 | -0.43 | 0.01 | 0.31 | 5.09E-05 |
| Proline betaine                       | Carboxylic acids and derivatives    | -0.04 | -0.21 | 0.25 | 0.01 | 7.10E-01 |
| O-Phosphotyrosine                     | Carboxylic acids and derivatives    | 0.00  | -0.39 | 0.42 | 0.00 | 9.74E-01 |
| N-Acetylputrescine                    | Carboximidic acids and derivatives  | 0.43  | 0.07  | 0.55 | 0.50 | 1.57E-09 |

|                                      |                                     |       |       |      |      |          |
|--------------------------------------|-------------------------------------|-------|-------|------|------|----------|
| Dehydrophytosphingosine              | Organonitrogen compounds            | 0.02  | -0.19 | 0.25 | 0.00 | 8.65E-01 |
| 13S-hydroxyoctadecadienoic acid      | Fatty Acyls                         | 0.14  | -0.06 | 0.27 | 0.09 | 9.20E-02 |
| o-Xylene                             | Benzene and substituted derivatives | 0.24  | -0.13 | 0.42 | 0.15 | 1.72E-03 |
| Asparaginyln-Hydroxyproline          | Carboxylic acids and derivatives    | 0.15  | -0.37 | 0.59 | 0.09 | 6.80E-02 |
| Pivaloylcarnitine                    | Fatty Acyls                         | -0.16 | -0.44 | 0.28 | 0.14 | 4.49E-02 |
| Norvaline                            | Carboxylic acids and derivatives    | -0.04 | -0.19 | 0.12 | 0.00 | 6.63E-01 |
| SM(d18:1/16:0)                       | Sphingolipids                       | -0.07 | -0.35 | 0.40 | 0.01 | 4.55E-01 |
| (2R)-2-Hydroxy-2-methylbutanenitrile | Organooxygen compounds              | -0.06 | -0.26 | 0.13 | 0.01 | 4.92E-01 |
| Nandrolone                           | Steroids and steroid derivatives    | 0.23  | -0.04 | 0.36 | 0.59 | 3.27E-03 |
| Arachidonic acid                     | Fatty Acyls                         | 0.22  | -0.07 | 0.33 | 0.33 | 4.23E-03 |
| 2-trans-6-cis-Dodecadienal           | Organooxygen compounds              | 0.33  | -0.01 | 0.49 | 0.30 | 7.23E-06 |
| MG(22:2(13Z,16Z)/0:0/0:0)            | Glycerolipids                       | -0.10 | -0.31 | 0.25 | 0.04 | 2.42E-01 |
| D-4'-Phosphopantothenate             | Carboxylic acids and derivatives    | 0.03  | -0.15 | 0.24 | 0.00 | 7.12E-01 |
| Bilirubin                            | Organoheterocyclic compounds        | 0.20  | -0.07 | 0.41 | 0.21 | 1.24E-02 |
| Vinylacetylglycine                   | Carboxylic acids and derivatives    | -0.02 | -0.31 | 0.24 | 0.00 | 8.21E-01 |
| Alpha-dimorphecolic acid             | Fatty Acyls                         | 0.34  | 0.03  | 0.43 | 0.80 | 3.57E-06 |

|                                                                                           |                                  |       |       |       |      |          |
|-------------------------------------------------------------------------------------------|----------------------------------|-------|-------|-------|------|----------|
| (alpha-D-mannosyl)7-beta-D-mannosyl-diacetylchitobiosyl-L-asparagine, isoform A (protein) | Carboxylic acids and derivatives | 0.39  | 0.11  | 0.54  | 0.16 | 9.34E-08 |
| Dihydro-6-isopropyl-2,4-dimethyl-4H-1,3,5-dithiazine                                      | Azacyclic compounds              | -0.03 | -0.16 | 0.11  | 0.00 | 8.03E-01 |
| Cohibin A                                                                                 | Fatty Acyls                      | -0.05 | -0.37 | 0.38  | 0.01 | 6.22E-01 |
| L-4-Hydroxyglutamate semialdehyde                                                         | Carboxylic acids and derivatives | -0.10 | -0.30 | 0.10  | 0.02 | 2.39E-01 |
| N2-gamma-Glutamylglutamine                                                                | Carboxylic acids and derivatives | 0.06  | -0.11 | 0.25  | 0.02 | 4.90E-01 |
| 2-Methoxy-3,5-dimethylpyrimidine                                                          | Diazines                         | 0.08  | -0.17 | 0.23  | 0.01 | 3.71E-01 |
| 3-Hydroxy-4-butanolide                                                                    | Organooxygen compounds           | -0.21 | -0.43 | 0.13  | 0.05 | 6.17E-03 |
| N-Methylnicotinamide                                                                      | Pyridines and derivatives        | 0.16  | -0.28 | 0.43  | 0.06 | 5.08E-02 |
| N6-Carbamoyl-L-threonyladenosine                                                          | Purine nucleosides               | -0.42 | -0.61 | -0.02 | 0.26 | 4.79E-09 |
| 6-Chloro-N-(1-methylethyl)-1,3,5-triazine-2,4-diamine                                     | Triazines                        | -0.19 | -0.32 | 0.03  | 0.17 | 1.79E-02 |
| L-alpha-Aspartyl-L-hydroxyproline                                                         | NA                               | -0.07 | -0.34 | 0.32  | 0.02 | 4.50E-01 |
| Glutaminylaspartic acid                                                                   | Carboxylic acids and derivatives | 0.13  | -0.12 | 0.30  | 0.04 | 1.02E-01 |
| N-Acetyldopamine                                                                          | Phenols                          | -0.22 | -0.36 | 0.01  | 0.48 | 4.80E-03 |
| 1,4-Dideoxy-1,4-imino-D-ribitol                                                           | Pyrrolidines                     | -0.03 | -0.17 | 0.11  | 0.00 | 7.19E-01 |
| Butyrylcarnitine                                                                          | Fatty Acyls                      | -0.22 | -0.57 | 0.23  | 0.05 | 4.64E-03 |
| Muricatacin                                                                               |                                  | 0.46  | 0.08  | 0.64  | 0.65 | 1.15E-10 |
| Sonchuionoside C                                                                          | Prenol lipids                    | 0.28  | 0.01  | 0.45  | 0.46 | 1.69E-04 |
| Lactosylceramide (d18:1/16:0)                                                             | Sphingolipids                    | -0.07 | -0.28 | 0.23  | 0.02 | 4.14E-01 |
| N-a-Acetyl-L-arginine                                                                     | Carboxylic acids and derivatives | -0.37 | -0.50 | -0.08 | 0.17 | 3.28E-07 |

|                                                        |                                    |       |       |      |      |          |
|--------------------------------------------------------|------------------------------------|-------|-------|------|------|----------|
| Avocadyne 4-acetate                                    | Fatty Acyls                        | 0.55  | 0.10  | 0.72 | 1.13 | 5.74E-16 |
| 4-(4-Methyl-3-pentenyl)-3-cyclohexene-1-carboxaldehyde | Prenol lipids                      | 0.25  | -0.10 | 0.43 | 0.15 | 1.44E-03 |
| 4-Hydroxymandelonitrile                                | NA                                 | 0.44  | 0.13  | 0.57 | 0.51 | 7.58E-10 |
| L-Aspartic acid                                        | Carboxylic acids and derivatives   | 0.34  | 0.03  | 0.54 | 1.06 | 6.00E-06 |
| LysoPE(0:0/22:1(13Z))                                  | Glycerophospholipids               | 0.47  | 0.06  | 0.60 | 1.54 | 5.36E-11 |
| Quinceoxepine                                          | Ethers                             | 0.18  | -0.10 | 0.31 | 0.15 | 2.16E-02 |
| 1-(beta-D-Ribofuranosyl)-1,4-dihydronicotinamide       | NA                                 | -0.22 | -0.66 | 0.31 | 0.05 | 5.15E-03 |
| LysoPE(0:0/18:0)                                       | Glycerophospholipids               | 0.11  | -0.19 | 0.39 | 0.05 | 1.83E-01 |
| N1-Methyl-4-pyridone-3-carboxamide                     | Pyridines and derivatives          | 0.03  | -0.18 | 0.23 | 0.00 | 7.66E-01 |
| Imidazole-4-acetaldehyde                               | Azoles                             | 0.08  | -0.24 | 0.30 | 0.01 | 3.48E-01 |
| Capsiate                                               | Phenols                            | 0.19  | -0.10 | 0.32 | 0.40 | 1.50E-02 |
| 3-Dehydroxycarnitine                                   | Fatty Acyls                        | 0.07  | -0.33 | 0.52 | 0.01 | 4.73E-01 |
| LysoPE(22:5(4Z,7Z,10Z,13Z,16Z)/0:0)                    | Glycerophospholipids               | 0.51  | 0.06  | 0.69 | 1.08 | 4.02E-13 |
| Corchorifatty acid D                                   | Fatty Acyls                        | 0.21  | -0.07 | 0.32 | 0.32 | 6.24E-03 |
| SM(d18:1/24:1(15Z))                                    | Sphingolipids                      | 0.09  | -0.20 | 0.39 | 0.03 | 2.80E-01 |
| HDmBOA-Glc                                             | Organooxygen compounds             | 0.13  | -0.22 | 0.36 | 0.03 | 1.28E-01 |
| Dieporeticenin                                         | Fatty Acyls                        | 0.38  | 0.09  | 0.65 | 0.29 | 1.42E-07 |
| LysoPE(18:2(9Z,12Z)/0:0)                               | Glycerophospholipids               | 0.61  | 0.22  | 0.71 | 1.51 | 2.65E-19 |
| Acrylamide                                             | Carboximidic acids and derivatives | -0.02 | -0.23 | 0.17 | 0.00 | 8.15E-01 |

|                                                                           |                                  |       |       |       |      |          |
|---------------------------------------------------------------------------|----------------------------------|-------|-------|-------|------|----------|
| N-Acetylneuraminic acid                                                   | Organooxygen compounds           | -0.13 | -0.33 | 0.18  | 0.02 | 1.15E-01 |
| Hydroxyisocaproic acid                                                    | Fatty Acyls                      | 0.02  | -0.23 | 0.23  | 0.00 | 8.67E-01 |
| Dihydrouracil                                                             | Diazines                         | 0.27  | -0.06 | 0.42  | 0.11 | 3.60E-04 |
| PC(16:0/16:0)                                                             | Glycerophospholipids             | 0.05  | -0.19 | 0.45  | 0.01 | 6.22E-01 |
| Indole                                                                    | Indoles and derivatives          | 0.32  | -0.04 | 0.48  | 0.25 | 1.71E-05 |
| Formiminoglutamic acid                                                    | Carboxylic acids and derivatives | -0.42 | -0.55 | -0.06 | 0.25 | 4.18E-09 |
| PC(20:0/14:0)                                                             | Glycerophospholipids             | -0.07 | -0.38 | 0.41  | 0.01 | 4.79E-01 |
| PC(18:1(11Z)/14:0)                                                        | Glycerophospholipids             | 0.18  | -0.12 | 0.61  | 0.07 | 2.52E-02 |
| LysoPE(22:6(4Z,7Z,10Z,13Z,16Z,19Z)/0:0)                                   | Glycerophospholipids             | 0.42  | 0.01  | 0.62  | 0.72 | 4.18E-09 |
| Hypoxanthine                                                              | Imidazopyrimidines               | 0.28  | -0.02 | 0.47  | 0.75 | 2.96E-04 |
| LysoPE(16:1(9Z)/0:0)                                                      | Glycerophospholipids             | 0.47  | 0.08  | 0.59  | 0.80 | 5.82E-11 |
| Glucosamine 6-phosphate                                                   | Organooxygen compounds           | 0.12  | -0.26 | 0.39  | 0.03 | 1.69E-01 |
| 2-Methylpiperidine                                                        | Piperidines                      | 0.02  | -0.22 | 0.22  | 0.00 | 8.27E-01 |
| 2-O-(5,8,11,14,17-Eicosapentaenoyl)-1-O-hexadecylglycero-3-phosphocholine | Glycerophospholipids             | 0.04  | -0.16 | 0.25  | 0.01 | 7.10E-01 |
| PE(16:0/20:4(5Z,8Z,11Z,14Z))                                              | Glycerophospholipids             | 0.16  | -0.07 | 0.38  | 0.10 | 4.38E-02 |
| 10-Nitrolinoleic acid                                                     | Fatty Acyls                      | 0.05  | -0.15 | 0.21  | 0.01 | 6.20E-01 |
| PE(22:5(4Z,7Z,10Z,13Z,16Z)/16:0)                                          | Glycerophospholipids             | 0.09  | -0.14 | 0.36  | 0.02 | 3.34E-01 |

|                                      |                                     |       |       |       |      |          |
|--------------------------------------|-------------------------------------|-------|-------|-------|------|----------|
| 4-Hydroxy-L-glutamic acid            | Organic acids and derivatives       | 0.13  | -0.02 | 0.24  | 0.09 | 1.21E-01 |
| Piperidine                           | Fatty Acyls                         | 0.01  | -0.15 | 0.19  | 0.00 | 8.88E-01 |
| PE(16:0/18:2(9Z,12Z))                | Glycerophospholipids                | 0.12  | -0.16 | 0.49  | 0.03 | 1.51E-01 |
| Montecristin                         | Fatty Acyls                         | 0.12  | -0.18 | 0.49  | 0.03 | 1.64E-01 |
| (4-Hydroxybenzoyl)choline            | Carbonyl compounds                  | -0.08 | -0.29 | 0.14  | 0.01 | 3.81E-01 |
| Deoxyeritadenine                     | Imidazopyrimidines                  | 0.16  | -0.05 | 0.29  | 0.04 | 4.62E-02 |
| PC(18:3(6Z,9Z,12Z)/18:0)             | Glycerophospholipids                | 0.39  | 0.04  | 0.58  | 0.36 | 1.35E-07 |
| Nephritogenoside                     | Fatty Acyls                         | -0.42 | -0.55 | -0.03 | 0.57 | 3.90E-09 |
| o-Ethyltoluene                       | Benzene and substituted derivatives | 0.36  | -0.05 | 0.51  | 0.40 | 1.29E-06 |
| PE(P-18:1(11Z)/18:3(6Z,9Z,12Z))      | Glycerophospholipids                | 0.01  | -0.22 | 0.36  | 0.00 | 8.72E-01 |
| beta-Alanine                         | Carboxylic acids and derivatives    | 0.38  | 0.10  | 0.51  | 0.15 | 1.96E-07 |
| PC(22:2(13Z,16Z)/P-18:0)             | Glycerophospholipids                | 0.02  | -0.26 | 0.36  | 0.00 | 8.67E-01 |
| DG(18:4(6Z,9Z,12Z,15Z)/16:1(9Z)/0:0) | Glycerolipids                       | 0.58  | 0.19  | 0.67  | 0.94 | 1.59E-17 |
| LysoPC(P-18:1(9Z))                   | Glycerophospholipids                | 0.09  | -0.17 | 0.28  | 0.04 | 3.21E-01 |
| MG(0:0/22:4(7Z,10Z,13Z,16Z)/0:0)     | Glycerolipids                       | 0.00  | -0.18 | 0.20  | 0.00 | 9.81E-01 |
| SM(d16:1/24:1(15Z))                  | Sphingolipids                       | 0.09  | -0.12 | 0.36  | 0.04 | 3.02E-01 |
| 4-Aminobutyraldehyde                 | Organooxygen compounds              | 0.17  | -0.09 | 0.37  | 0.04 | 2.98E-02 |

|                                             |                                  |       |       |      |      |          |
|---------------------------------------------|----------------------------------|-------|-------|------|------|----------|
| 1-(Malonylamino)cyclopropanecarboxylic acid | Carboxylic acids and derivatives | 0.16  | -0.35 | 0.40 | 0.09 | 5.21E-02 |
| Quercetin                                   | Flavonoids                       | 0.19  | -0.19 | 0.50 | 0.21 | 1.95E-02 |
| N-Acetyl-a-neuraminic acid                  | Organooxygen compounds           | -0.10 | -0.28 | 0.17 | 0.02 | 2.29E-01 |
| Ethyl trans-p-methoxycinnamate              | Cinnamic acids and derivatives   | 0.09  | -0.16 | 0.24 | 0.11 | 3.12E-01 |
| 4-Oxo-2-nonenal                             | Organooxygen compounds           | 0.02  | -0.19 | 0.20 | 0.00 | 8.27E-01 |
| 3-Methyl sulfolene                          | Dihydrothiophenes                | 0.26  | 0.01  | 0.46 | 0.16 | 6.14E-04 |
| PC(18:2(9Z,12Z)/18:0)                       | Glycerophospholipids             | 0.24  | -0.09 | 0.62 | 0.11 | 1.48E-03 |
| SM(d17:1/24:0)                              | Sphingolipids                    | -0.18 | -0.42 | 0.19 | 0.11 | 2.45E-02 |
| L-Octanoylcarnitine                         | Fatty Acyls                      | -0.12 | -0.30 | 0.15 | 0.03 | 1.37E-01 |
| gamma-Glutamylglutamic acid                 | Carboxylic acids and derivatives | -0.08 | -0.49 | 0.43 | 0.03 | 3.52E-01 |
| Ipomeatetrahydrofuran                       | Prenol lipids                    | 0.56  | 0.13  | 0.70 | 0.72 | 4.45E-16 |
| LysoPE(20:5(5Z,8Z,11Z,14Z,17Z)/0:0)         | Glycerophospholipids             | 0.60  | 0.20  | 0.69 | 1.52 | 8.76E-19 |
| Prolyl-Glutamine                            | Carboxylic acids and derivatives | -0.07 | -0.60 | 0.38 | 0.01 | 4.25E-01 |
| PC(22:5(7Z,10Z,13Z,16Z,19Z)/15:0)           | Glycerophospholipids             | 0.02  | -0.22 | 0.42 | 0.00 | 8.43E-01 |
| PC(20:2(11Z,14Z)/14:0)                      | Glycerophospholipids             | 0.32  | 0.01  | 0.60 | 0.19 | 1.64E-05 |
| PC(20:1(11Z)/14:0)                          | Glycerophospholipids             | 0.13  | -0.17 | 0.44 | 0.05 | 1.24E-01 |
| (R)-2-Hydroxysterculic acid                 | Fatty Acyls                      | 0.48  | 0.09  | 0.62 | 0.81 | 2.02E-11 |

|                                             |                                  |       |       |      |      |          |
|---------------------------------------------|----------------------------------|-------|-------|------|------|----------|
| Fagomine                                    | Piperidines                      | 0.28  | -0.10 | 0.51 | 0.12 | 2.22E-04 |
| Isoleucyl-Alanine                           | Carboxylic acids and derivatives | -0.12 | -0.32 | 0.11 | 0.02 | 1.69E-01 |
| Glutamyllysine                              | Carboxylic acids and derivatives | -0.14 | -0.31 | 0.12 | 0.18 | 7.77E-02 |
| PC(15:0/15:0)                               | Glycerophospholipids             | -0.06 | -0.32 | 0.45 | 0.01 | 5.44E-01 |
| MG(0:0/18:4(6Z,9Z,12Z,15Z)/0:0)             | Glycerolipids                    | 0.45  | 0.04  | 0.59 | 1.13 | 2.53E-10 |
| N2-Maltulosylarginine                       | Saccharolipids                   | -0.17 | -0.31 | 0.06 | 0.27 | 3.44E-02 |
| PC(22:2(13Z,16Z)/16:1(9Z))                  | Glycerophospholipids             | 0.21  | -0.12 | 0.63 | 0.10 | 7.00E-03 |
| SM(d18:1/20:0)                              | Sphingolipids                    | 0.08  | -0.14 | 0.35 | 0.02 | 3.63E-01 |
| Kojibiose                                   | Fatty Acyls                      | -0.44 | -0.64 | 0.15 | 0.59 | 1.22E-09 |
| Cytokinin B                                 | Imidazopyrimidines               | -0.25 | -0.50 | 0.02 | 0.18 | 1.22E-03 |
| DG(18:4(6Z,9Z,12Z,15Z)/14:1(9Z)/0:0)        | Glycerolipids                    | 0.58  | 0.20  | 0.68 | 0.95 | 1.59E-17 |
| PC(20:2(11Z,14Z)/20:4(5Z,8Z,11Z,14Z))       | Glycerophospholipids             | 0.14  | -0.17 | 0.52 | 0.06 | 9.96E-02 |
| SM(d17:1/24:1(15Z))                         | Sphingolipids                    | -0.02 | -0.27 | 0.37 | 0.00 | 8.39E-01 |
| SM(d18:0/18:1(9Z))                          | Sphingolipids                    | 0.06  | -0.18 | 0.39 | 0.01 | 4.99E-01 |
| 5beta-Cholestane-3alpha,7alpha,24,26-tetrol | NA                               | -0.06 | -0.30 | 0.23 | 0.01 | 4.98E-01 |
| PC(22:5(4Z,7Z,10Z,13Z,16Z)/16:0)            | Glycerophospholipids             | 0.30  | -0.03 | 0.63 | 0.17 | 7.46E-05 |
| PC(22:5(4Z,7Z,10Z,13Z,16Z)/P-18:0)          | Glycerophospholipids             | -0.03 | -0.22 | 0.25 | 0.00 | 7.84E-01 |
| PC(24:0/14:1(9Z))                           | Glycerophospholipids             | 0.18  | -0.12 | 0.42 | 0.14 | 2.20E-02 |
| LysoPC(16:0)                                | Glycerophospholipids             | 0.16  | -0.12 | 0.34 | 0.10 | 4.80E-02 |

|                                   |                                     |       |       |      |      |          |
|-----------------------------------|-------------------------------------|-------|-------|------|------|----------|
| Sialyllacto-N-tetraose b          | Organooxygen compounds              | -0.18 | -0.40 | 0.35 | 0.10 | 2.72E-02 |
| SM(d18:1/14:0)                    | Sphingolipids                       | 0.08  | -0.14 | 0.41 | 0.03 | 3.56E-01 |
| PI(22:5(4Z,7Z,10Z,13Z,16Z)/16:0)  | Glycerophospholipids                | 0.01  | -0.32 | 0.51 | 0.00 | 9.08E-01 |
| Lactapiperanol D                  | Prenol lipids                       | 0.10  | -0.17 | 0.25 | 0.05 | 2.54E-01 |
| L-Gulonolactone                   | Lactones                            | -0.19 | -0.39 | 0.04 | 0.05 | 1.79E-02 |
| 2,6-Di-tert-butyl-4-ethylphenol   | Benzene and substituted derivatives | 0.37  | 0.02  | 0.49 | 0.67 | 3.34E-07 |
| PC(18:3(6Z,9Z,12Z)/18:1(11Z))     | Glycerophospholipids                | 0.24  | 0.00  | 0.44 | 0.23 | 2.25E-03 |
| PC(22:4(7Z,10Z,13Z,16Z)/16:0)     | Glycerophospholipids                | 0.24  | -0.02 | 0.53 | 0.27 | 1.70E-03 |
| PC(22:5(4Z,7Z,10Z,13Z,16Z)/15:0)  | Glycerophospholipids                | 0.02  | -0.29 | 0.53 | 0.00 | 8.63E-01 |
| PC(14:0/14:0)                     | Glycerophospholipids                | 0.00  | -0.27 | 0.46 | 0.00 | 9.81E-01 |
| dADP                              | Purine nucleotides                  | -0.04 | -0.25 | 0.11 | 0.00 | 6.81E-01 |
| PC(20:1(11Z)/20:4(5Z,8Z,11Z,14Z)) | Glycerophospholipids                | 0.18  | -0.15 | 0.62 | 0.08 | 2.44E-02 |
| 3-Benzyl-4-heptanone              | Benzene and substituted derivatives | 0.53  | 0.18  | 0.64 | 0.91 | 1.81E-14 |
| Betonicine                        | Carboxylic acids and derivatives    | -0.19 | -0.33 | 0.05 | 0.14 | 1.43E-02 |
| Diepomuricanin A                  | NA                                  | 0.21  | -0.04 | 0.43 | 0.10 | 7.85E-03 |
| LysoPE(0:0/14:0)                  | Glycerophospholipids                | 0.39  | 0.03  | 0.55 | 1.00 | 8.72E-08 |

|                                                                                             |                                          |       |       |      |      |          |
|---------------------------------------------------------------------------------------------|------------------------------------------|-------|-------|------|------|----------|
| SM(d18:0/14:0)                                                                              | Sphingolipids                            | 0.13  | -0.13 | 0.46 | 0.05 | 1.15E-01 |
| PC(20:2(11Z,14Z)/15:0)                                                                      | Glycerophospholipids                     | 0.27  | -0.07 | 0.64 | 0.17 | 3.30E-04 |
| PC(22:2(13Z,16Z)/15:0)                                                                      | Glycerophospholipids                     | 0.32  | -0.02 | 0.55 | 0.33 | 1.36E-05 |
| 2-(acetylamino)-1,5-anhydro-2-deoxy-3-O- $\beta$ -D-galactopyranosyl-D-arabino-Hex-1-enitol | Organooxygen compounds                   | -0.04 | -0.45 | 0.39 | 0.00 | 7.11E-01 |
| PC(20:3(5Z,8Z,11Z)/20:0)                                                                    | Glycerophospholipids                     | 0.23  | -0.07 | 0.48 | 0.28 | 2.63E-03 |
| LysoPC(18:2(9Z,12Z))                                                                        | Glycerophospholipids                     | 0.57  | 0.16  | 0.71 | 1.18 | 3.83E-17 |
| Urothion                                                                                    | Pteridines and derivatives               | -0.13 | -0.43 | 0.29 | 0.18 | 1.15E-01 |
| (2'E,4'Z,7'Z,8E)-Colnelenic acid                                                            | Fatty Acyls                              | 0.16  | -0.10 | 0.28 | 0.22 | 4.80E-02 |
| PC(20:0/20:2(11Z,14Z))                                                                      | Glycerophospholipids                     | 0.24  | -0.06 | 0.48 | 0.35 | 1.56E-03 |
| Glycerylphosphorylethanolamine                                                              | Organic phosphoric acids and derivatives | 0.23  | -0.09 | 0.46 | 0.20 | 2.90E-03 |
| 6,10,14-Trimethyl-5,9,13-pentadecatrien-2-one                                               | Prenol lipids                            | 0.40  | 0.02  | 0.50 | 0.64 | 3.20E-08 |
| trans-3,4-Dihydro-4,8-dihydroxy-3-methyl-1H-2-benzopyran-1-one                              | Benzopyrans                              | -0.38 | -0.57 | 0.09 | 0.27 | 1.60E-07 |
| Pyridoxamine                                                                                | Pyridines and derivatives                | -0.02 | -0.17 | 0.18 | 0.00 | 8.67E-01 |
| PC(22:4(7Z,10Z,13Z,16Z)/14:0)                                                               | Glycerophospholipids                     | 0.32  | -0.02 | 0.61 | 0.24 | 2.19E-05 |
| PE(20:0/18:4(6Z,9Z,12Z,15Z))                                                                | Glycerophospholipids                     | 0.07  | -0.20 | 0.46 | 0.01 | 4.35E-01 |

|                                                |                                     |       |       |       |      |          |
|------------------------------------------------|-------------------------------------|-------|-------|-------|------|----------|
| SM(d18:1/18:1(9Z))                             | Sphingolipids                       | -0.05 | -0.29 | 0.37  | 0.01 | 6.22E-01 |
| Cohibin C                                      | Fatty Acyls                         | 0.10  | -0.25 | 0.56  | 0.03 | 2.34E-01 |
| 8-Hydroxy-2-octene-4,6-diynoic acid            | Fatty Acyls                         | -0.26 | -0.48 | 0.14  | 0.84 | 7.90E-04 |
| 5-Hydroxy-L-tryptophan                         | Indoles and derivatives             | -0.01 | -0.17 | 0.18  | 0.00 | 9.14E-01 |
| PC(20:4(8Z,11Z,14Z,17Z)/P-18:0)                | Glycerophospholipids                | 0.00  | -0.21 | 0.29  | 0.00 | 9.81E-01 |
| Phenylacetylglutamine                          | Carboxylic acids and derivatives    | -0.22 | -0.35 | 0.06  | 0.11 | 4.99E-03 |
| Isoeugenitol                                   | Benzopyrans                         | 0.27  | -0.03 | 0.43  | 0.13 | 3.95E-04 |
| PC(16:1(9Z)/16:1(9Z))                          | Glycerophospholipids                | 0.18  | -0.07 | 0.47  | 0.10 | 2.57E-02 |
| gamma-L-Glutamyl-gamma-L-glutamyl-L-methionine |                                     | -0.32 | -0.46 | -0.03 | 0.45 | 1.98E-05 |
| 3-Oxoadipic acid                               | Keto acids and derivatives          | -0.22 | -0.41 | 0.06  | 0.05 | 4.92E-03 |
| 6-Deoxohomodolichosterone                      | Steroids and steroid derivatives    | -0.08 | -0.33 | 0.28  | 0.02 | 3.43E-01 |
| PC(18:1(9Z)/P-18:1(11Z))                       | Glycerophospholipids                | 0.09  | -0.14 | 0.32  | 0.02 | 2.82E-01 |
| N-Salicyloylaspartic acid                      | Carboxylic acids and derivatives    | 0.13  | -0.19 | 0.30  | 0.02 | 1.08E-01 |
| Vanilpyruvic acid                              | Benzene and substituted derivatives | -0.11 | -0.28 | 0.07  | 0.02 | 1.76E-01 |
| PC(22:5(7Z,10Z,13Z,16Z,19Z)/16:1(9Z))          | Glycerophospholipids                | 0.18  | -0.14 | 0.58  | 0.08 | 2.44E-02 |
| LysoPC(22:6(4Z,7Z,10Z,13Z,16Z,19Z))            | Glycerophospholipids                | 0.34  | -0.02 | 0.52  | 0.39 | 4.58E-06 |

|                                                               |                                  |       |       |       |      |          |
|---------------------------------------------------------------|----------------------------------|-------|-------|-------|------|----------|
| Norsanguinarine                                               | Quinolines and derivatives       | 0.13  | -0.14 | 0.28  | 0.04 | 1.15E-01 |
| 3-Methyl-5-pentyl-2-furanundecanoic acid                      | Fatty Acyls                      | 0.49  | 0.09  | 0.57  | 0.67 | 5.50E-12 |
| 3-Aminopropionaldehyde                                        | Organooxygen compounds           | 0.30  | -0.01 | 0.45  | 0.16 | 6.46E-05 |
| PC(22:5(7Z,10Z,13Z,16Z,19Z)/16:0)                             | Glycerophospholipids             | 0.25  | 0.01  | 0.52  | 0.26 | 1.22E-03 |
| PC(20:3(8Z,11Z,14Z)/14:0)                                     | Glycerophospholipids             | 0.34  | 0.05  | 0.50  | 0.42 | 3.95E-06 |
| Dihydromaleimide                                              | NA                               | 0.21  | -0.08 | 0.33  | 0.10 | 8.76E-03 |
| 2,5-Dioxopentanoate                                           | Keto acids and derivatives       | -0.10 | -0.27 | 0.08  | 0.01 | 2.56E-01 |
| CS-S-Methylcysteine sulfoxide                                 | NA                               | 0.19  | -0.22 | 0.50  | 0.35 | 1.50E-02 |
| Oxonantenine                                                  | Aporphines                       | -0.15 | -0.52 | 0.42  | 0.04 | 6.38E-02 |
| DG(14:1(9Z)/18:3(6Z,9Z,12Z)/0:0)                              | Glycerolipids                    | 0.60  | 0.16  | 0.73  | 0.93 | 7.09E-19 |
| 2-Acetylpyridine                                              | Carbonyl compounds               | 0.05  | -0.15 | 0.23  | 0.00 | 5.73E-01 |
| 2-Hydroxy-6,7-dimethoxybenzoxazole                            | Benzoxazoles                     | -0.52 | -0.61 | -0.18 | 0.47 | 3.85E-14 |
| Perillyl acetate                                              | NA                               | 0.06  | -0.23 | 0.24  | 0.02 | 5.17E-01 |
| N-[(4E,8E)-1,3-dihydroxyoctadeca-4,8-dien-2-yl]hexadecanamide | Sphingolipids                    | -0.10 | -0.32 | 0.12  | 0.04 | 2.56E-01 |
| Dihydro-3-(1-octenyl)-2,5-furandione                          | Oxolanes                         | -0.05 | -0.20 | 0.13  | 0.01 | 6.22E-01 |
| Artonin Q                                                     | Benzopyrans                      | -0.08 | -0.35 | 0.25  | 0.02 | 3.93E-01 |
| 2-Aminomuconic acid semialdehyde                              | Carboxylic acids and derivatives | 0.04  | -0.18 | 0.25  | 0.01 | 6.75E-01 |
| DG(20:4(8Z,11Z,14Z,17Z)/14:0/0:0)                             | Glycerolipids                    | 0.54  | 0.17  | 0.68  | 0.83 | 3.27E-15 |
| Lacto-N-triose I                                              | Organooxygen compounds           | -0.02 | -0.45 | 0.42  | 0.00 | 8.39E-01 |

|                                                                                                                                |                                  |       |       |       |      |          |
|--------------------------------------------------------------------------------------------------------------------------------|----------------------------------|-------|-------|-------|------|----------|
| PC(P-18:1(9Z)/14:1(9Z))                                                                                                        | Glycerophospholipids             | 0.02  | -0.19 | 0.23  | 0.00 | 8.55E-01 |
| (2S,4S)-Pinnatanine                                                                                                            | Carboxylic acids and derivatives | -0.04 | -0.33 | 0.27  | 0.00 | 6.75E-01 |
| O-6-deoxy-a-L-galactopyranosyl-(1->2)-O-b-D-galactopyranosyl-(1->3)-2-(acetylamino)-1,5-anhydro-2-deoxy-D-arabino-Hex-1-enitol | Organooxygen compounds           | -0.25 | -0.44 | 0.12  | 0.18 | 1.34E-03 |
| Persicachrome                                                                                                                  | Prenol lipids                    | 0.42  | 0.01  | 0.62  | 0.60 | 8.73E-09 |
| L-trans-5-Hydroxy-2-piperidinecarboxylic acid                                                                                  | Carboxylic acids and derivatives | -0.08 | -0.26 | 0.14  | 0.01 | 3.93E-01 |
| 2-acetyl-1-alkyl-sn-glycero-3-phosphocholine                                                                                   | Glycerophospholipids             | 0.19  | -0.11 | 0.46  | 0.13 | 1.59E-02 |
| PC(16:1(9Z)/15:0)                                                                                                              | Glycerophospholipids             | 0.12  | -0.24 | 0.58  | 0.04 | 1.39E-01 |
| LysoPC(P-16:0)                                                                                                                 | Glycerophospholipids             | -0.06 | -0.24 | 0.14  | 0.01 | 5.17E-01 |
| Phenol glucuronide                                                                                                             | Organooxygen compounds           | -0.35 | -0.48 | -0.03 | 0.41 | 2.08E-06 |
| PC(18:3(6Z,9Z,12Z)/15:0)                                                                                                       | Glycerophospholipids             | 0.18  | -0.06 | 0.39  | 0.09 | 2.59E-02 |
| PI(20:2(11Z,14Z)/18:2(9Z,12Z))                                                                                                 | Glycerophospholipids             | -0.14 | -0.45 | 0.44  | 0.06 | 9.83E-02 |
| Glycine                                                                                                                        | Carboxylic acids and derivatives | 0.35  | 0.08  | 0.47  | 0.21 | 3.36E-06 |
| DG(14:1(9Z)/18:2(9Z,12Z)/0:0)                                                                                                  | Glycerolipids                    | 0.56  | 0.11  | 0.70  | 0.83 | 2.22E-16 |
| Epomusenin A                                                                                                                   | Fatty Acyls                      | -0.08 | -0.32 | 0.30  | 0.01 | 3.76E-01 |
| Troxerutin                                                                                                                     | Flavonoids                       | 0.30  | -0.24 | 0.60  | 0.41 | 7.53E-05 |

|                                                  |                                  |       |       |      |      |          |
|--------------------------------------------------|----------------------------------|-------|-------|------|------|----------|
| LysoPE(20:2(11Z,14Z)/0:0)                        | Glycerophospholipids             | 0.58  | -0.03 | 0.81 | 1.72 | 6.53E-18 |
| PE(P-18:1(11Z)/22:4(7Z,10Z,13Z,16Z))             | Glycerophospholipids             | 0.10  | -0.13 | 0.41 | 0.03 | 2.60E-01 |
| PC(22:4(7Z,10Z,13Z,16Z)/15:0)                    | Glycerophospholipids             | -0.01 | -0.31 | 0.48 | 0.00 | 9.57E-01 |
| 1-Methylpyrrole                                  | Pyrroles                         | 0.03  | -0.15 | 0.17 | 0.00 | 7.94E-01 |
| LysoPC(22:5(4Z,7Z,10Z,13Z,16Z))                  | Glycerophospholipids             | 0.40  | 0.02  | 0.57 | 1.08 | 2.39E-08 |
| 5-Hydroxyindoleacetic acid                       | Indoles and derivatives          | 0.05  | -0.15 | 0.23 | 0.01 | 5.73E-01 |
| Seryltyrosine                                    | Carboxylic acids and derivatives | -0.10 | -0.22 | 0.05 | 0.01 | 2.41E-01 |
| 5-Hydroxyisourate                                |                                  | 0.29  | 0.04  | 0.44 | 1.61 | 9.70E-05 |
| Lacto-N-biose I                                  | Organooxygen compounds           | 0.19  | -0.12 | 0.38 | 0.08 | 1.45E-02 |
| PE(P-18:1(11Z)/18:2(9Z,12Z))                     | Glycerophospholipids             | 0.21  | 0.00  | 0.51 | 0.16 | 8.26E-03 |
| 3-(3,4-Dihydroxy-5-methoxy)-2-propenoic acid     | Cinnamic acids and derivatives   | -0.05 | -0.26 | 0.20 | 0.00 | 6.24E-01 |
| 4-Hydroxy-3-(16-methylheptadecyl)-2H-pyran-2-one | Pyrans                           | 0.30  | 0.00  | 0.40 | 0.38 | 5.32E-05 |
| LysoPC(20:3(5Z,8Z,11Z))                          | Glycerophospholipids             | 0.31  | -0.07 | 0.56 | 0.34 | 3.74E-05 |
| PI(20:3(5Z,8Z,11Z)/16:0)                         | Glycerophospholipids             | 0.17  | -0.12 | 0.47 | 0.13 | 3.90E-02 |
| 1-(3,5-Dihydroxyphenyl)-2-pentadecanone          | Phenols                          | 0.34  | 0.09  | 0.49 | 0.60 | 4.99E-06 |

|                                                           |                                     |       |       |      |      |          |
|-----------------------------------------------------------|-------------------------------------|-------|-------|------|------|----------|
| Glucocheirolin                                            | Organooxygen compounds              | 0.31  | -0.06 | 0.55 | 0.37 | 3.78E-05 |
| PE(18:1(9Z)/16:0)                                         | Glycerophospholipids                | 0.15  | -0.11 | 0.51 | 0.07 | 7.39E-02 |
| 5-Hydroxy-7-methoxy-2-tritriacontyl-4H-1-benzopyran-4-one | Benzopyrans                         | 0.04  | -0.18 | 0.27 | 0.01 | 6.79E-01 |
| DG(14:1(9Z)/22:5(4Z,7Z,10Z,13Z,16Z)/0:0)                  | Glycerolipids                       | 0.34  | 0.02  | 0.49 | 1.07 | 5.67E-06 |
| 12,13-EpOME                                               | Fatty Acyls                         | 0.32  | -0.06 | 0.45 | 0.41 | 2.45E-05 |
| PE(20:4(8Z,11Z,14Z,17Z)/P-16:0)                           | Glycerophospholipids                | -0.02 | -0.29 | 0.37 | 0.00 | 8.52E-01 |
| 3,5-Dichloro-4-hydroxy-2-methoxy-6-methylbenzoic acid     | Benzene and substituted derivatives | 0.06  | -0.17 | 0.20 | 0.00 | 5.50E-01 |
| Hydroxyphenylacetyl glycine                               | Carboxylic acids and derivatives    | 0.03  | -0.32 | 0.28 | 0.00 | 7.12E-01 |
| DG(22:4(7Z,10Z,13Z,16Z)/18:3(6Z,9Z,12Z)/0:0)              | Glycerolipids                       | 0.24  | -0.05 | 0.35 | 0.31 | 2.28E-03 |
| PC(22:6(4Z,7Z,10Z,13Z,16Z,19Z)/15:0)                      | Glycerophospholipids                | 0.00  | -0.28 | 0.43 | 0.00 | 9.89E-01 |
| PS(14:0/22:2(13Z,16Z))                                    | Glycerophospholipids                | -0.23 | -0.54 | 0.45 | 0.18 | 3.59E-03 |
| PC(20:4(8Z,11Z,14Z,17Z)/15:0)                             | Glycerophospholipids                | 0.10  | -0.13 | 0.46 | 0.04 | 2.57E-01 |
| Epiafzelechin 3-gallate                                   |                                     | 0.10  | -0.43 | 0.61 | 0.05 | 2.60E-01 |
| PE(18:1(11Z)/18:2(9Z,12Z))                                | Glycerophospholipids                | 0.16  | -0.05 | 0.46 | 0.11 | 5.32E-02 |
| PE(P-18:1(9Z)/16:1(9Z))                                   | Glycerophospholipids                | 0.02  | -0.26 | 0.40 | 0.00 | 8.67E-01 |
| Demethylated antipyrine                                   | Azoles                              | 0.21  | -0.01 | 0.35 | 0.13 | 6.57E-03 |

|                                                    |                           |       |       |      |      |          |
|----------------------------------------------------|---------------------------|-------|-------|------|------|----------|
| PE(P-18:1(11Z)/22:5(4Z,7Z,10Z,13Z,16Z))            | Glycerophospholipids      | 0.06  | -0.19 | 0.43 | 0.01 | 4.99E-01 |
| 3-Fucosyllactose                                   | Organooxygen compounds    | 0.18  | -0.23 | 0.46 | 0.13 | 2.09E-02 |
| LysoPI(18:0/0:0)                                   | Glycerophospholipids      | -0.06 | -0.29 | 0.20 | 0.01 | 4.81E-01 |
| Isolinderanolide                                   | Tetrahydrofurans          | 0.62  | 0.24  | 0.73 | 1.46 | 1.41E-20 |
| PE(P-18:1(9Z)/20:3(5Z,8Z,11Z))                     | Glycerophospholipids      | -0.05 | -0.30 | 0.36 | 0.01 | 5.80E-01 |
| Marmesin rhamnoside                                | Coumarins and derivatives | -0.12 | -0.36 | 0.15 | 0.02 | 1.60E-01 |
| 1-Isothiocyanato-6-(methylthio)hexane              | Isothiocyanates           | 0.14  | -0.13 | 0.30 | 0.04 | 7.55E-02 |
| PE(P-18:1(9Z)/20:5(5Z,8Z,11Z,14Z,17Z))             | Glycerophospholipids      | -0.07 | -0.32 | 0.39 | 0.01 | 4.11E-01 |
| PC(P-16:0/18:4(6Z,9Z,12Z,15Z))                     | Glycerophospholipids      | -0.08 | -0.28 | 0.29 | 0.02 | 3.49E-01 |
| Obtusilactone A                                    | Tetrahydrofurans          | 0.55  | 0.18  | 0.65 | 0.72 | 9.37E-16 |
| PE(P-18:1(9Z)/18:1(9Z))                            | Glycerophospholipids      | 0.03  | -0.21 | 0.41 | 0.00 | 7.19E-01 |
| PE(22:6(4Z,7Z,10Z,13Z,16Z,19Z)/P-18:1(11Z))        | Glycerophospholipids      | 0.14  | -0.17 | 0.49 | 0.04 | 9.95E-02 |
| PE(20:4(5Z,8Z,11Z,14Z)/P-18:1(11Z))                | Glycerophospholipids      | 0.16  | -0.15 | 0.52 | 0.04 | 5.19E-02 |
| Cohibin B                                          | Fatty Acyls               | 0.14  | -0.07 | 0.38 | 0.04 | 9.82E-02 |
| Dide-O-methyl-4-O-alpha-D-glucopyranosylsimmondsin | Organooxygen compounds    | -0.05 | -0.30 | 0.28 | 0.01 | 5.73E-01 |
| PC(P-18:1(9Z)/16:1(9Z))                            | Glycerophospholipids      | 0.00  | -0.18 | 0.16 | 0.00 | 9.76E-01 |

|                                          |                      |       |       |      |      |          |
|------------------------------------------|----------------------|-------|-------|------|------|----------|
| 1-Isothiocyanto-6-(methylsulfinyl)hexane | Sulfoxides           | 0.00  | -0.16 | 0.17 | 0.00 | 9.93E-01 |
| PC(20:3(8Z,11Z,14Z)/15:0)                | Glycerophospholipids | 0.04  | -0.28 | 0.53 | 0.00 | 6.97E-01 |
| 3-Isopropenylpentanedioic acid           | Fatty Acyls          | -0.23 | -0.62 | 0.22 | 0.05 | 2.58E-03 |
| PE(P-16:0/20:4(5Z,8Z,11Z,14Z))           | Glycerophospholipids | -0.08 | -0.32 | 0.40 | 0.01 | 3.68E-01 |
| Glaucarubin                              | Prenol lipids        | 0.09  | -0.24 | 0.34 | 0.05 | 3.27E-01 |
| PE(22:2(13Z,16Z)/18:1(11Z))              | Glycerophospholipids | 0.20  | -0.17 | 0.58 | 0.11 | 1.24E-02 |
| PE(P-18:0/18:2(9Z,12Z))                  | Glycerophospholipids | 0.02  | -0.25 | 0.39 | 0.00 | 8.63E-01 |
| Melleolide M                             | Prenol lipids        | 0.12  | -0.16 | 0.34 | 0.11 | 1.38E-01 |
| PE(P-18:0/22:4(7Z,10Z,13Z,16Z))          | Glycerophospholipids | -0.07 | -0.32 | 0.35 | 0.01 | 4.16E-01 |
| Metiamide                                | Azoles               | 0.46  | -0.10 | 0.60 | 0.58 | 7.13E-11 |
| PS(18:0/22:6(4Z,7Z,10Z,13Z,16Z,19Z))     | Glycerophospholipids | -0.19 | -0.49 | 0.43 | 0.18 | 1.43E-02 |

---

**Table S6.** Association between human milk PC scores, infant growth and risk of eczema by sex (n=200)

|                                      |         | Boys (n=114) |         |           |         | Girls (n=86) |         |           |         |
|--------------------------------------|---------|--------------|---------|-----------|---------|--------------|---------|-----------|---------|
|                                      |         | PC 1         |         | PC 2      |         | PC 1         |         | PC 2      |         |
|                                      |         | Estimates    | P value | Estimates | P value | Estimates    | P value | Estimates | P value |
| Maternal BMI<br>(kg/m <sup>2</sup> ) | Model 1 | -0.05        | 0.345   | 0.08      | 0.086   | -0.01        | 0.926   | 0.08      | 0.086   |
|                                      | Model 2 | -0.05        | 0.347   | 0.08      | 0.109   | -0.003       | 0.960   | 0.08      | 0.093   |
| BAZ                                  | Model 1 | -0.03        | 0.501   | 0.001     | 0.869   | -0.02        | 0.637   | -0.01     | 0.890   |
|                                      | Model 2 | -0.03        | 0.397   | -0.02     | 0.518   | -0.03        | 0.517   | -0.01     | 0.817   |
| WAZ                                  | Model 1 | -0.08        | 0.017   | 0.02      | 0.443   | -0.05        | 0.171   | 0.00      | 0.966   |
|                                      | Model 2 | -0.07        | 0.018   | 2.0E-03   | 0.945   | -0.05        | 0.083   | 7.0E-03   | 0.795   |
| LAZ                                  | Model 1 | -0.11        | 0.004   | 0.025     | 0.424   | -0.06        | 0.154   | 0.006     | 0.879   |
|                                      | Model 2 | -0.07        | 0.012   | 0.025     | 0.418   | -0.06        | 0.176   | 0.019     | 0.592   |
| Eczema                               | Model 1 | 0.95         | 0.279   | 1.07      | 0.078   | 0.94         | 0.340   | 1.07      | 0.133   |
|                                      | Model 2 | 0.96         | 0.392   | 1.08      | 0.048   | 0.95         | 0.455   | 1.06      | 0.224   |

Estimates for allergies were presented as odds ratio. Model 1 adjusted for infant age, sex, maternal age and city; model 2 adjusted for infant age, sex, city, maternal age, birth weight and birth length.

WAZ: weight-for-age z score, LAZ: length-for-age z score, BAZ: BMI-for-age z score

**Table S7.** Differentially expressed human milk metabolites between samples collected in summer and winter (n=77)

| Metabolites                                               | Summer (n=20) |          | Winter (n=57) |          | Fold change | FDR      |
|-----------------------------------------------------------|---------------|----------|---------------|----------|-------------|----------|
|                                                           | Mean          | SD       | Mean          | SD       |             |          |
| Solasodine                                                | 8.94E-07      | 2.27E-06 | 4.26E-06      | 6.12E-06 | 0.21        | 6.31E-03 |
| N2-gamma-Glutamylglutamine                                | 2.63E-05      | 1.82E-05 | 1.13E-04      | 8.18E-05 | 0.23        | 1.42E-08 |
| MG(0:0/22:4(7Z,10Z,13Z,16Z)/0:0)                          | 8.31E-06      | 6.36E-06 | 3.20E-05      | 1.72E-05 | 0.26        | 1.68E-10 |
| 5beta-Cholestane-3alpha,7alpha,24,26-tetrol               | 8.95E-06      | 7.65E-06 | 2.76E-05      | 1.20E-05 | 0.32        | 1.22E-08 |
| N2-Maltulosylarginine                                     | 1.95E-06      | 1.91E-06 | 5.69E-06      | 6.54E-06 | 0.34        | 2.33E-03 |
| Biliverdin                                                | 2.92E-05      | 4.11E-05 | 8.29E-05      | 8.35E-05 | 0.35        | 3.71E-03 |
| Betonicine                                                | 3.96E-05      | 2.59E-05 | 1.09E-04      | 1.65E-04 | 0.36        | 2.28E-02 |
| PE(16:0/20:4(5Z,8Z,11Z,14Z))                              | 5.09E-05      | 2.45E-05 | 1.39E-04      | 8.45E-05 | 0.37        | 3.90E-08 |
| 6-Deoxohomodolichosterone                                 | 8.21E-06      | 7.03E-06 | 2.21E-05      | 1.14E-05 | 0.37        | 1.09E-06 |
| gamma-Glutamylglutamic acid                               | 2.70E-06      | 2.01E-06 | 7.26E-06      | 6.12E-06 | 0.37        | 9.07E-05 |
| CS-S-Methylcysteine sulfoxide                             | 2.03E-05      | 1.86E-05 | 5.33E-05      | 5.23E-05 | 0.38        | 1.25E-03 |
| Melleolide M                                              | 4.47E-06      | 3.22E-06 | 1.05E-05      | 6.26E-06 | 0.43        | 1.90E-05 |
| Anserine                                                  | 9.98E-06      | 5.09E-06 | 2.29E-05      | 2.29E-05 | 0.44        | 1.75E-03 |
| 5-Hydroxy-7-methoxy-2-tritriacontyl-4H-1-benzopyran-4-one | 1.49E-05      | 7.69E-06 | 3.38E-05      | 1.51E-05 | 0.44        | 4.25E-08 |
| PC(18:3(6Z,9Z,12Z)/15:0)                                  | 4.33E-04      | 1.69E-04 | 9.43E-04      | 3.64E-04 | 0.46        | 1.22E-09 |
| PE(18:1(11Z)/18:2(9Z,12Z))                                | 1.18E-04      | 4.48E-05 | 2.58E-04      | 1.10E-04 | 0.46        | 4.21E-09 |
| LysoPE(0:0/18:3(6Z,9Z,12Z))                               | 1.10E-05      | 7.00E-06 | 2.38E-05      | 2.74E-05 | 0.46        | 1.36E-02 |
| PI(20:3(5Z,8Z,11Z)/16:0)                                  | 2.70E-06      | 1.25E-06 | 5.83E-06      | 3.09E-06 | 0.46        | 5.72E-07 |
| gamma-L-Glutamyl-gamma-L-glutamyl-L-methionine            | 7.00E-06      | 4.60E-06 | 1.50E-05      | 1.21E-05 | 0.47        | 8.80E-04 |
| Glaucarubin                                               | 1.01E-05      | 8.79E-06 | 2.14E-05      | 1.90E-05 | 0.47        | 5.92E-03 |
| Urocanic acid                                             | 1.29E-04      | 1.22E-04 | 2.71E-04      | 2.44E-04 | 0.48        | 1.01E-02 |
| Sonchuionoside C                                          | 2.64E-05      | 2.04E-05 | 5.32E-05      | 2.48E-05 | 0.50        | 3.53E-04 |
| PE(22:5(4Z,7Z,10Z,13Z,16Z)/16:0)                          | 6.40E-05      | 2.66E-05 | 1.24E-04      | 4.33E-05 | 0.52        | 5.83E-08 |
| PC(20:3(8Z,11Z,14Z)/14:0)                                 | 5.41E-05      | 1.93E-05 | 1.03E-04      | 8.67E-05 | 0.53        | 1.75E-03 |
| 4-Hydroxy-L-glutamic acid                                 | 1.55E-04      | 1.42E-04 | 2.95E-04      | 1.20E-04 | 0.53        | 4.50E-03 |

|                                                           |          |          |          |          |      |          |
|-----------------------------------------------------------|----------|----------|----------|----------|------|----------|
| PC(16:1(9Z)/16:1(9Z))                                     | 3.42E-05 | 2.23E-05 | 6.46E-05 | 3.08E-05 | 0.53 | 3.24E-04 |
| Pyroglutamic acid                                         | 3.53E-05 | 3.11E-05 | 6.62E-05 | 3.13E-05 | 0.53 | 4.94E-03 |
| 5'-Methylthioadenosine                                    | 6.61E-04 | 1.62E-04 | 1.22E-03 | 4.72E-04 | 0.54 | 4.85E-09 |
| Adenine                                                   | 8.16E-05 | 7.25E-05 | 1.48E-04 | 7.84E-05 | 0.55 | 1.08E-02 |
| 5-Hydroxyisourate                                         | 1.77E-04 | 1.79E-04 | 3.13E-04 | 1.63E-04 | 0.57 | 3.45E-02 |
| MG(22:2(13Z,16Z)/0:0/0:0)                                 | 8.03E-05 | 5.43E-05 | 1.36E-04 | 7.33E-05 | 0.59 | 6.77E-03 |
| PC(14:0/14:0)                                             | 1.14E-05 | 8.23E-06 | 1.89E-05 | 1.44E-05 | 0.60 | 3.71E-02 |
| SM(d18:0/14:0)                                            | 2.20E-05 | 9.98E-06 | 3.41E-05 | 2.66E-05 | 0.64 | 3.13E-02 |
| PS(14:0/22:2(13Z,16Z))                                    | 1.01E-04 | 5.29E-05 | 1.57E-04 | 1.06E-04 | 0.65 | 2.44E-02 |
| D-Glutamine                                               | 1.03E-02 | 5.13E-03 | 1.55E-02 | 5.51E-03 | 0.66 | 4.63E-03 |
| Styrene                                                   | 8.62E-05 | 2.23E-05 | 5.53E-05 | 2.61E-05 | 1.56 | 1.55E-04 |
| Indole                                                    | 2.36E-04 | 5.58E-05 | 1.36E-04 | 6.42E-05 | 1.74 | 1.97E-06 |
| LysoPC(22:6(4Z,7Z,10Z,13Z,16Z,19Z))                       | 1.57E-05 | 1.01E-05 | 8.91E-06 | 6.40E-06 | 1.77 | 4.95E-02 |
| Hypoxanthine                                              | 3.89E-05 | 2.19E-05 | 2.20E-05 | 1.97E-05 | 1.77 | 3.13E-02 |
| (R)-2-Hydroxysterculic acid                               | 3.75E-04 | 1.08E-04 | 2.04E-04 | 1.00E-04 | 1.84 | 1.54E-05 |
| Niacinamide                                               | 3.63E-03 | 1.65E-03 | 1.93E-03 | 1.25E-03 | 1.88 | 2.54E-03 |
| N1-Methyl-4-pyridone-3-carboxamide                        | 1.66E-03 | 9.35E-04 | 8.48E-04 | 5.21E-04 | 1.95 | 1.01E-02 |
| Diethanolamine                                            | 1.45E-04 | 1.15E-04 | 6.98E-05 | 2.29E-05 | 2.08 | 4.87E-02 |
| o-Ethyltoluene                                            | 8.10E-05 | 1.92E-05 | 3.69E-05 | 2.23E-05 | 2.19 | 2.00E-08 |
| Perillyl acetate                                          | 4.10E-05 | 2.58E-05 | 1.85E-05 | 4.46E-05 | 2.22 | 4.85E-02 |
| Epsilon-caprolactam                                       | 1.06E-04 | 6.31E-05 | 4.74E-05 | 2.83E-05 | 2.23 | 5.44E-03 |
| PC(P-18:1(9Z)/16:1(9Z))                                   | 5.45E-05 | 1.97E-05 | 2.36E-05 | 2.17E-05 | 2.31 | 2.05E-05 |
| Avocadyne 4-acetate                                       | 2.50E-04 | 1.35E-04 | 1.03E-04 | 4.81E-05 | 2.42 | 1.25E-03 |
| 3-Methyl-5-pentyl-2-furanundecanoic acid                  | 1.34E-03 | 3.69E-04 | 5.30E-04 | 2.17E-04 | 2.53 | 8.07E-08 |
| LysoPE(20:1(11Z)/0:0)                                     | 8.30E-05 | 4.16E-05 | 3.25E-05 | 2.51E-05 | 2.55 | 4.14E-04 |
| (9S,10E,12Z,15Z)-9-Hydroxy-10,12,15-octadecatrienoic acid | 6.87E-05 | 4.07E-05 | 2.46E-05 | 2.88E-05 | 2.79 | 1.47E-03 |
| 12,13-EpOME                                               | 3.00E-05 | 1.40E-05 | 9.96E-06 | 7.31E-06 | 3.01 | 7.03E-05 |
| DG(22:5(7Z,10Z,13Z,16Z,19Z)/16:1(9Z)/0:0)                 | 2.42E-05 | 1.16E-05 | 7.83E-06 | 7.15E-06 | 3.09 | 7.19E-05 |

|                                                      |          |          |          |          |      |          |
|------------------------------------------------------|----------|----------|----------|----------|------|----------|
| Quinceoxepine                                        | 5.48E-05 | 2.74E-05 | 1.71E-05 | 1.91E-05 | 3.22 | 9.69E-05 |
| MG(0:0/18:4(6Z,9Z,12Z,15Z)/0:0)                      | 1.26E-04 | 7.50E-05 | 3.86E-05 | 4.46E-05 | 3.25 | 7.21E-04 |
| LysoPE(0:0/22:1(13Z))                                | 3.71E-05 | 3.41E-05 | 1.11E-05 | 1.70E-05 | 3.35 | 2.38E-02 |
| Dihydro-6-isopropyl-2,4-dimethyl-4H-1,3,5-dithiazine | 3.09E-05 | 1.66E-05 | 9.10E-06 | 1.12E-05 | 3.40 | 1.73E-04 |
| 13S-hydroxyoctadecadienoic acid                      | 1.09E-05 | 6.02E-06 | 3.18E-06 | 3.86E-06 | 3.44 | 2.14E-04 |
| 4-Hydroxy-3-(16-methylheptadecyl)-2H-pyran-2-one     | 2.14E-05 | 8.07E-06 | 6.15E-06 | 6.10E-06 | 3.49 | 7.75E-07 |
| 6,10,14-Trimethyl-5,9,13-pentadecatrien-2-one        | 3.40E-04 | 1.18E-04 | 9.55E-05 | 6.90E-05 | 3.56 | 2.59E-07 |
| 5,12-dihydroxy-6,8,10,14,17-eicosapentaenoic acid    | 1.94E-05 | 1.14E-05 | 5.13E-06 | 7.87E-06 | 3.78 | 3.11E-04 |
| Alpha-dimorphecolic acid                             | 9.44E-04 | 3.34E-04 | 2.38E-04 | 3.44E-04 | 3.96 | 8.07E-08 |
| 2,6-Di-tert-butyl-4-ethylphenol                      | 9.14E-05 | 4.20E-05 | 2.29E-05 | 2.23E-05 | 3.98 | 1.14E-05 |
| Corchorifatty acid D                                 | 2.70E-05 | 1.77E-05 | 6.49E-06 | 1.63E-05 | 4.15 | 9.25E-04 |
| DG(22:4(7Z,10Z,13Z,16Z)/18:3(6Z,9Z,12Z)/0:0)         | 2.37E-05 | 1.13E-05 | 5.60E-06 | 5.64E-06 | 4.24 | 1.54E-05 |
| Nandrolone                                           | 5.93E-05 | 5.43E-05 | 1.38E-05 | 4.88E-05 | 4.29 | 1.73E-02 |
| 4,8 Dimethylnonanoyl carnitine                       | 4.73E-05 | 3.69E-05 | 9.86E-06 | 2.32E-05 | 4.80 | 2.63E-03 |
| (2'E,4'Z,7'Z,8E)-Colnelenic acid                     | 1.68E-04 | 1.57E-04 | 3.25E-05 | 1.09E-04 | 5.17 | 1.08E-02 |
| Arachidonic acid                                     | 4.52E-05 | 1.68E-05 | 7.50E-06 | 1.37E-05 | 6.03 | 4.03E-08 |
| Delta-12-Prostaglandin J2                            | 1.77E-05 | 1.29E-05 | 1.79E-06 | 7.49E-06 | 9.85 | 3.53E-04 |

Results were based on independent sample t-test between samples collected in summer and in winter. Fold change was calculated as summer vs. winter.

**Table S8.** Overlapped human milk metabolites being identified from both PC 1 and t-test

| Metabolites                                               | PC1 loading | Fold change | FDR      |
|-----------------------------------------------------------|-------------|-------------|----------|
| N2-gamma-Glutamylglutamine                                | -0.75       | 0.23        | 1.42E-08 |
| MG(0:0/22:4(7Z,10Z,13Z,16Z)/0:0)                          | -0.69       | 0.26        | 1.68E-10 |
| 5beta-Cholestane-3alpha,7alpha,24,26-tetrol               | -0.56       | 0.32        | 1.22E-08 |
| Biliverdin                                                | -0.83       | 0.35        | 3.71E-03 |
| PE(16:0/20:4(5Z,8Z,11Z,14Z))                              | -0.56       | 0.37        | 3.90E-08 |
| Melleolide M                                              | -0.75       | 0.43        | 1.90E-05 |
| 5-Hydroxy-7-methoxy-2-tritriacontyl-4H-1-benzopyran-4-one | -0.56       | 0.44        | 4.25E-08 |
| PC(18:3(6Z,9Z,12Z)/15:0)                                  | -0.64       | 0.46        | 1.22E-09 |
| Glaucarubin                                               | -0.77       | 0.47        | 5.92E-03 |
| Sonchuionoside C                                          | -0.69       | 0.50        | 3.53E-04 |
| PE(22:5(4Z,7Z,10Z,13Z,16Z)/16:0)                          | -0.55       | 0.52        | 5.83E-08 |
| 4-Hydroxy-L-glutamic acid                                 | -0.87       | 0.53        | 4.50E-03 |
| Pyroglutamic acid                                         | -0.67       | 0.53        | 4.94E-03 |
| 5'-Methylthioadenosine                                    | -0.57       | 0.54        | 4.85E-09 |
| Adenine                                                   | -0.56       | 0.55        | 1.08E-02 |
| 5-Hydroxyisourate                                         | -0.73       | 0.57        | 3.45E-02 |
| D-Glutamine                                               | -0.73       | 0.66        | 4.63E-03 |
| Styrene                                                   | 0.74        | 1.56        | 1.55E-04 |
| Indole                                                    | 0.79        | 1.74        | 1.97E-06 |
| Niacinamide                                               | 0.56        | 1.88        | 2.54E-03 |
| o-Ethyltoluene                                            | 0.77        | 2.19        | 2.00E-08 |
| Perillyl acetate                                          | 0.82        | 2.22        | 4.85E-02 |
| 3-Methyl-5-pentyl-2-furanundecanoic acid                  | 0.69        | 2.53        | 8.07E-08 |
| (9S,10E,12Z,15Z)-9-Hydroxy-10,12,15-octadecatrienoic acid | 0.80        | 2.79        | 1.47E-03 |
| 12,13-EpOME                                               | 0.83        | 3.01        | 7.03E-05 |
| DG(22:5(7Z,10Z,13Z,16Z,19Z)/16:1(9Z)/0:0)                 | 0.69        | 3.09        | 7.19E-05 |
| Quinceoxepine                                             | 0.86        | 3.22        | 9.69E-05 |

|                                                      |      |      |          |
|------------------------------------------------------|------|------|----------|
| MG(0:0/18:4(6Z,9Z,12Z,15Z)/0:0)                      | 0.71 | 3.25 | 7.21E-04 |
| Dihydro-6-isopropyl-2,4-dimethyl-4H-1,3,5-dithiazine | 0.83 | 3.40 | 1.73E-04 |
| 13S-hydroxyoctadecadienoic acid                      | 0.85 | 3.44 | 2.14E-04 |
| 4-Hydroxy-3-(16-methylheptadecyl)-2H-pyran-2-one     | 0.76 | 3.49 | 7.75E-07 |
| 6,10,14-Trimethyl-5,9,13-pentadecatrien-2-one        | 0.79 | 3.56 | 2.59E-07 |
| 5,12-dihydroxy-6,8,10,14,17-eicosapentaenoic acid    | 0.69 | 3.78 | 3.11E-04 |
| Alpha-dimorphecolic acid                             | 0.83 | 3.96 | 8.07E-08 |
| 2,6-Di-tert-butyl-4-ethylphenol                      | 0.76 | 3.98 | 1.14E-05 |
| Corchorifatty acid D                                 | 0.87 | 4.15 | 9.25E-04 |
| DG(22:4(7Z,10Z,13Z,16Z)/18:3(6Z,9Z,12Z)/0:0)         | 0.71 | 4.24 | 1.54E-05 |
| Nandrolone                                           | 0.82 | 4.29 | 1.73E-02 |
| 4,8 Dimethylnonanoyl carnitine                       | 0.87 | 4.80 | 2.63E-03 |
| (2'E,4'Z,7'Z,8E)-Colnelenic acid                     | 0.88 | 5.17 | 1.08E-02 |
| Arachidonic acid                                     | 0.87 | 6.03 | 4.03E-08 |
| Delta-12-Prostaglandin J2                            | 0.84 | 9.85 | 3.53E-04 |

---

Fold change was calculated as summer vs. winter.

**Table S9.** Overlapped human milk metabolites being identified from both PC 2 and t-test

| Metabolites                      | PC2 loading | Fold change | FDR      |
|----------------------------------|-------------|-------------|----------|
| PE(16:0/20:4(5Z,8Z,11Z,14Z))     | 0.54        | 0.37        | 6.44E-16 |
| PE(22:5(4Z,7Z,10Z,13Z,16Z)/16:0) | 0.61        | 0.52        | 4.02E-21 |
| PC(14:0/14:0)                    | 0.61        | 0.60        | 4.02E-21 |
| SM(d18:0/14:0)                   | 0.65        | 0.64        | 7.15E-24 |
| PC(16:1(9Z)/16:1(9Z))            | 0.69        | 0.53        | 1.25E-28 |
| 6-Deoxohomodolichosterone        | 0.54        | 0.37        | 2.08E-15 |
| PC(20:3(8Z,11Z,14Z)/14:0)        | 0.52        | 0.53        | 1.06E-14 |
| PC(18:3(6Z,9Z,12Z)/15:0)         | 0.57        | 0.46        | 1.27E-17 |
| PI(20:3(5Z,8Z,11Z)/16:0)         | 0.55        | 0.46        | 4.55E-16 |
| PS(14:0/22:2(13Z,16Z))           | 0.57        | 0.65        | 2.04E-17 |

Fold change was calculated as summer vs. winter.

**Table S10 Association between weight of milk collected, PC scores, ambient temperature and infant z scores (n = 200).**

|                            | <b>Estimates</b> | <b>P value</b> |
|----------------------------|------------------|----------------|
| <b>PC1 score</b>           | <b>-0.51</b>     | <b>0.007</b>   |
| <b>PC2 score</b>           | <b>0.13</b>      | <b>0.552</b>   |
| <b>Ambient temperature</b> | <b>-0.92</b>     | <b>0.022</b>   |
| <b>WAZ</b>                 | <b>1.86</b>      | <b>0.032</b>   |
| <b>LAZ</b>                 | <b>0.94</b>      | <b>0.210</b>   |

Multiple linear regression adjusted for infant age, sex, maternal age and city.

WAZ: weight-for-age z score, LAZ: length-for-age z score

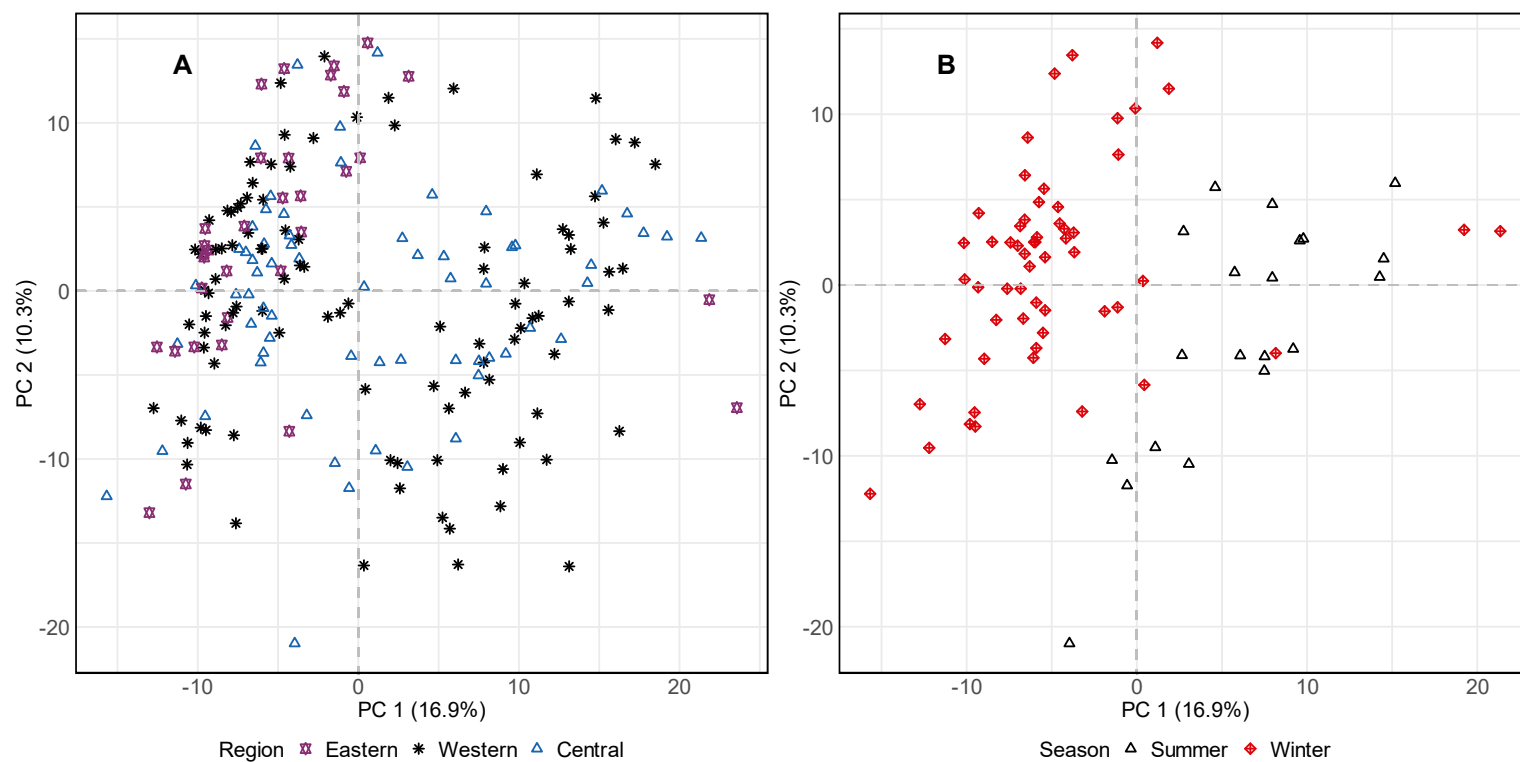

**Figure S1.** PCA score plot of human milk metabolites.

A: PCA score plot across three regions of China. The Eastern includes Beijing, Guangzhou, Jinhua and Weihai; the Western includes Chengdu and Lanzhou, the Central includes Zhengzhou.

B: PCA score plot between summer and winter.

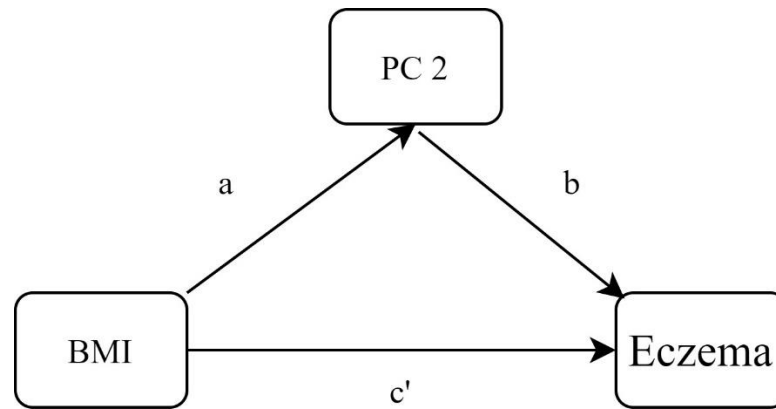

Indirect effect : 1.04 (0.996, 1.142)  
 Direct effect : 1.24 (1.007, 2.255) \*  
 Total effect: 1.285 (1.030, 2.416) \*

**Figure S2.** Mediation analysis between human milk PC scores, maternal postpartum BMI and risk of allergies.

Indirect effect, direct effect and total effect were defined as  $a \times b$ ,  $c'$  and  $a \times b + c'$ , respectively. All the effects were expressed as estimate (95% bootstrap confidence interval). \* indicates significant effect based on 95% bootstrap CI. All the models were adjusted for infant age, infant sex, city, and maternal age.

PC 2: score of principal component 2; BMI: maternal postpartum BMI. <sup>99</sup>

## 2. Materials and Methods

### 2.4. *Untargeted metabolomic analysis*

#### 2.4.1. Metabolites extraction

Metabolites were extracted by mixing 100  $\mu$ L of sample and 400  $\mu$ L of extract solution (acetonitrile: methanol=1:1, containing mixture of three isotopically labelled internal standards). The internal standards were carefully selected to avoid any potential intervene with HM endogenous metabolism. The mixture was vortexed for 30 s, sonicated for 10 min in ice-water bath, and incubated for 1 h at -40 °C to precipitate proteins. The mixture was then centrifuged at 12000 rpm for 15 min at 4 °C. The resulting supernatant was transferred to a fresh glass vial for analysis. Quality control samples (21 in total) were prepared by mixing an equal aliquot of the supernatants from all the samples.

#### 2.4.2. LC-MS/MS Analysis

LC-MS/MS analyses were performed using an UHPLC system (Vanquish, Thermo Fisher Scientific) with a UPLC BEH Amide column (2.1 mm  $\times$  100 mm, 1.7  $\mu$ m) coupled to Q Exactive HFX mass spectrometer (Orbitrap MS, Thermo). The mobile phase consisted of 25 mmol/L ammonium acetate and 25 ammonia hydroxide in water (pH = 9.75) (A) and acetonitrile (B). The auto-sampler temperature was 4 °C, and the injection volume was 3  $\mu$ L. The QE HFX mass spectrometer was used for its ability to acquire MS/MS spectra on information-dependent acquisition (IDA) mode in the control of the acquisition software (Xcalibur, Thermo). In this mode, the acquisition software continuously evaluates the full scan MS spectrum. The ESI source conditions were set as following: sheath gas flow rate as 30 Arb, Aux gas flow rate as 25 Arb, capillary temperature 350 °C, full MS resolution as 60000, MS/MS resolution as 7500, collision energy as 10/30/60 in NCE mode, spray Voltage as 3.6 kV (positive) or -3.2 kV (negative), respectively.

#### 2.4.3. Data preprocessing and annotation

The raw data were converted to the mzXML format using ProteoWizard and processed with an in-house program, which was developed using R and based on XCMS, for peak detection, extraction, alignment, and integration. Then an in-house MS2 database built with over 2,000 chemical standards was applied in metabolite annotation. The similarity score of MS/MS spectra was calculated by using the forward dot-product algorithm [10]. The cutoff for annotation was set at 0.3.
